# Supplementary material for: Near-infrared spectroscopy of H3O+⋯Xn (X = Ar, N2, and CO, n = 1–3)
Source: Royal Society of Chemistry journal article supplement (doi:10.1039/d4cp00458b), 2024-01-01
Supplement: d4cp00458b1.pdf [file d4cp00458b1.pdf]

## Electronic Supplementary Information for

### Near-infrared spectroscopy of $\text{H}_3\text{O}^+\cdots\text{X}_n$ ( $\text{X} = \text{Ar}$ , $\text{N}_2$ , and $\text{CO}$ , $n = 1-3$ ):

Qian-Rui Huang,<sup>a†</sup> Kazuyoshi Yano,<sup>b†</sup> Yaodi Yang,<sup>b</sup> Asuka Fujii,<sup>b\*</sup> Jer-Lai Kuo<sup>a\*</sup>

<sup>a</sup> *Institute of Atomic and Molecular Sciences, Academia Sinica, Taipei, Taiwan*

<sup>b</sup> *Department of Chemistry, Graduate School of Science, Tohoku University, Sendai, Japan.*

\*Corresponding authors: (A.F.) [asuka.fujii.c5@tohoku.ac.jp](mailto:asuka.fujii.c5@tohoku.ac.jp), (J.-L. K.)

[jlkuo@pub.iams.sinica.edu.tw](mailto:jlkuo@pub.iams.sinica.edu.tw)

†Q. -R. Huang and K. Yano contributed equally.

## Contents

**Figure S1.** Infrared Spectra of Bare and Ar-Tagged  $\text{H}_3\text{O}^+\cdots\text{CO}$  in the OH Stretch Fundamental Region.

**Table S1.** Cartesian Coordinates of  $\text{H}_3\text{O}^+\cdots\text{X}_n$  ( $\text{X} = \text{Ar}$ ,  $\text{N}_2$ , and  $\text{CO}$ ,  $n = 1-3$ ) Optimized by MP2/aug-cc-pVDZ.

**Table S2.** Normal Modes Frequencies and Intensities of  $\text{H}_3\text{O}^+\cdots\text{X}_n$  ( $\text{X} = \text{Ar}$ ,  $\text{N}_2$ , and  $\text{CO}$ ,  $n = 1-3$ ) Evaluated by MP2/aug-cc-pVDZ.

**Table S3.** Energy and Intrinsic IR Intensities of Selected FBR Basis

**Table S4.** Assignment, Projection and Transition Dipole Decomposition of the Pronounced Peaks

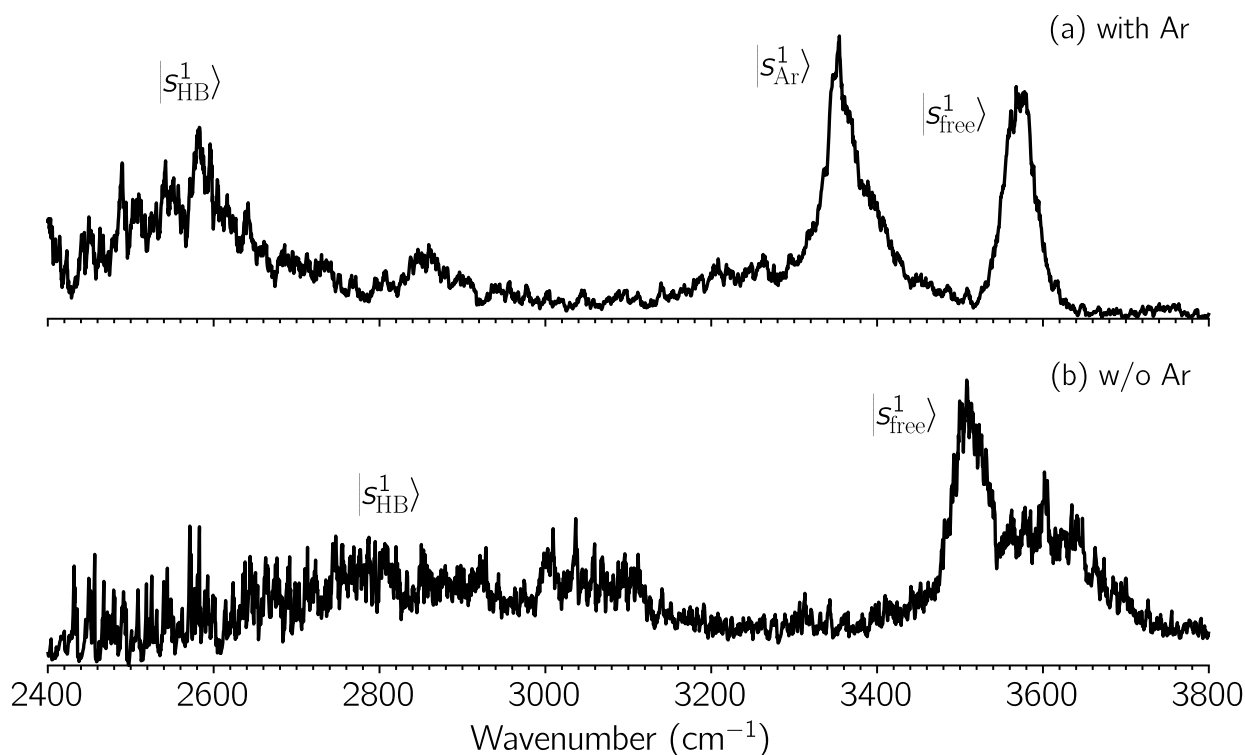

**Figure S1. Infrared Spectra of Bare and Ar-Tagged  $\text{H}_3\text{O}^+\cdots\text{CO}$  in the OH Stretch Fundamental Region.** (a) Ar-tagged  $\text{H}_3\text{O}^+\cdots\text{CO}$ . (b) bare  $\text{H}_3\text{O}^+\cdots\text{CO}$ . The Ar-loss channel was monitored to measure the spectrum of the Ar-tagged cluster. The CO-loss channel was monitored in the spectrum of the bare cluster.

The CO-bound OH stretching vibrational band  $|s_{\text{HB}}^1\rangle$  is observed at 2600 cm<sup>-1</sup> in the Ar-tagged cluster, while that in the bare cluster appears as a very broadened band in the 2600 – 3200 cm<sup>-1</sup> region and its maximum is seen at ~2900 cm<sup>-1</sup>. Because the binding energy of  $\text{H}_3\text{O}^+\cdots\text{CO}$  is estimated to be 5040 cm<sup>-1</sup> (at the MP2/aug-cc-pVDZ level of theory with the zero-point energy and basis set superposition error corrections), only clusters with high internal (thermal) energy can dissociate with excitation of OH-stretching fundamentals. The dissociation yield upon IR absorption in the low frequency region becomes much lower since assistance of higher internal energy is requested to dissociate. Though  $|s_{\text{HB}}^1\rangle$  in the bare cluster would be located at lower than 2600 cm<sup>-1</sup>, absorption in this region was not detected due to the lack of predissociation, and only its long tail to the high frequency side was observed in the spectrum. Since the binding energy with Ar is much less,  $|s_{\text{HB}}^1\rangle$  is observed without modulation by the dissociation yield. We should also note that  $|s_{\text{HB}}^1\rangle$  would be somewhat blue-shifted from that of the bare cluster because of the anti-cooperative effect of the Ar tagging (H-bond formation with Ar).  $|s_{\text{Ar}}^1\rangle$  in the Ar-tagged cluster is the Ar-bound OH-stretching vibrational band, which shows a red shift due to the H-bond formation from the free OH stretch bands,  $|s_{\text{free}}^1\rangle$ .

**Table S1. Cartesian Coordinates of  $\text{H}_3\text{O}^+\cdots\text{X}_n$  (X =Ar, N<sub>2</sub>, and CO,  $n = 1-3$ ) Optimized by MP2/aug-cc-pVDZ**

All the structures were optimized at MP2/aug-cc-pVDZ.

$\text{H}_3\text{O}^+\cdots\text{Ar}$

|    |           |           |           |
|----|-----------|-----------|-----------|
| O  | -0.000000 | 0.010278  | 0.737812  |
| H  | -0.000000 | 0.956580  | 0.429174  |
| H  | -0.807049 | -0.460338 | 0.436903  |
| H  | 0.807049  | -0.460338 | 0.436903  |
| Ar | 0.000000  | 2.987099  | -0.123114 |

$\text{H}_3\text{O}^+\cdots\text{Ar}_2$

|    |           |           |           |
|----|-----------|-----------|-----------|
| O  | 0.000000  | -0.003497 | 0.740036  |
| H  | 0.000000  | 0.928938  | 0.437612  |
| H  | -0.818343 | -0.472551 | 0.433025  |
| H  | 0.818343  | -0.472551 | 0.433025  |
| Ar | -2.603747 | -1.503808 | -0.129049 |
| Ar | 2.603747  | -1.503808 | -0.129049 |

$\text{H}_3\text{O}^+\cdots\text{Ar}_3$

|    |          |           |           |
|----|----------|-----------|-----------|
| O  | 1.430000 | 0.000000  | 0.000000  |
| H  | 1.737403 | 0.000000  | 0.940387  |
| H  | 1.737403 | 0.814399  | -0.470194 |
| H  | 1.737403 | -0.814399 | -0.470194 |
| Ar | 2.308733 | 0.000000  | 3.027277  |
| Ar | 2.308733 | 2.621698  | -1.513638 |
| Ar | 2.308733 | -2.621698 | -1.513638 |

H3O<sup>+</sup>...N<sub>2</sub>

|   |           |           |           |
|---|-----------|-----------|-----------|
| O | -1.836053 | -0.000000 | 0.087678  |
| H | -0.824701 | -0.000000 | 0.003114  |
| H | -2.236235 | 0.803557  | -0.304432 |
| H | -2.236235 | -0.803557 | -0.304432 |
| N | 0.862754  | 0.000000  | -0.015110 |
| N | 1.992331  | 0.000000  | 0.001442  |

H3O<sup>+</sup>...(N<sub>2</sub>)<sub>2</sub>

|   |           |           |           |
|---|-----------|-----------|-----------|
| O | -0.000000 | -0.020285 | 0.647379  |
| H | -0.000000 | 0.909417  | 0.346209  |
| H | -0.834517 | -0.493937 | 0.354150  |
| H | 0.834517  | -0.493937 | 0.354150  |
| N | -2.319600 | -1.332074 | -0.033601 |
| N | 2.319600  | -1.332074 | -0.033601 |
| N | -3.287189 | -1.873597 | -0.250852 |
| N | 3.287189  | -1.873597 | -0.250852 |

H3O<sup>+</sup>...(N<sub>2</sub>)<sub>3</sub>

|   |          |           |           |
|---|----------|-----------|-----------|
| O | 1.430000 | 0.000000  | 0.000000  |
| H | 1.724582 | 0.000000  | 0.951680  |
| H | 1.724582 | 0.824179  | -0.475840 |
| H | 1.724582 | -0.824179 | -0.475840 |
| N | 2.126797 | 0.000000  | 2.700422  |
| N | 2.126797 | 2.338634  | -1.350211 |
| N | 2.126797 | -2.338634 | -1.350211 |
| N | 2.343159 | 0.000000  | 3.809567  |
| N | 2.343159 | 3.299182  | -1.904784 |
| N | 2.343159 | -3.299182 | -1.904784 |

$\text{H}_3\text{O}^+\cdots\text{CO}$ 

|   |           |           |           |
|---|-----------|-----------|-----------|
| O | 0.056624  | -1.888466 | -0.000000 |
| H | -0.013759 | -0.839249 | -0.000000 |
| H | -0.334041 | -2.293732 | 0.799916  |
| H | -0.334041 | -2.293732 | -0.799916 |
| C | -0.000000 | 0.815315  | 0.000000  |
| O | 0.028606  | 1.955319  | 0.000000  |

 $\text{H}_3\text{O}^+\cdots(\text{CO})_2$ 

|   |           |           |           |
|---|-----------|-----------|-----------|
| O | 0.104559  | 1.281489  | -0.000000 |
| H | -0.520429 | 2.030651  | -0.000000 |
| H | 0.016368  | 0.730420  | 0.853980  |
| H | 0.016368  | 0.730420  | -0.853980 |
| C | -0.014729 | -0.175044 | 2.370386  |
| C | -0.014729 | -0.175044 | -2.370386 |
| O | -0.011355 | -0.750710 | 3.356644  |
| O | -0.011355 | -0.750710 | -3.356644 |

 $\text{H}_3\text{O}^+\cdots(\text{CO})_3$ 

|   |          |           |           |
|---|----------|-----------|-----------|
| O | 1.430000 | 0.000000  | 0.000000  |
| H | 1.719273 | 0.000000  | 0.963783  |
| H | 1.719273 | 0.834660  | -0.481891 |
| H | 1.719273 | -0.834660 | -0.481891 |
| C | 2.106746 | 0.000000  | 2.757247  |
| C | 2.106746 | 2.387846  | -1.378623 |
| C | 2.106746 | -2.387846 | -1.378623 |
| O | 2.318608 | 0.000000  | 3.880415  |
| O | 2.318608 | 3.360538  | -1.940208 |
| O | 2.318608 | -3.360538 | -1.940208 |

**Table S2. Normal Modes Frequencies and Intensities of  $\text{H}_3\text{O}^+\cdots\text{X}_n$  Evaluated by MP2/aug-cc-pVDZ.**

$\text{H}_3\text{O}^+\cdots\text{Ar}$

| Freq | Intensity | Symmetry Representation | Assignment                               |
|------|-----------|-------------------------|------------------------------------------|
| 150  | 60.5      | A'                      | OH $\cdots$ Ar Intermolecular Stretching |
| 228  | 5.0       | A''                     | Hindered Rotation                        |
| 313  | 95.1      | A'                      | Rocking                                  |
| 931  | 328.4     | A'                      | Umbrella                                 |
| 1665 | 71.9      | A'                      | Anti-symmetric Bending                   |
| 1671 | 53.3      | A''                     | Anti-symmetric Bending                   |
| 3354 | 956.7     | A'                      | Hydrogen-Bonded OH Stretching            |
| 3618 | 374.7     | A'                      | Symmetric Free OH Stretching             |
| 3698 | 416.2     | A''                     | Anti-symmetric Free OH Stretching        |

$\text{H}_3\text{O}^+\cdots\text{Ar}_2$

| Freq | Intensity | Symmetry Representation | Assignment                                   |
|------|-----------|-------------------------|----------------------------------------------|
| 24   | 6.1       | A'                      | OH $\cdots$ Ar Intermolecular Bending        |
| 126  | 31.0      | A'                      | OH $\cdots$ Ar Intermolecular Stretching     |
| 155  | 70.4      | A''                     | OH $\cdots$ Ar Intermolecular Stretching     |
| 224  | 76.3      | A'                      | Rocking                                      |
| 281  | 7.9       | A''                     | Hindered Rotation                            |
| 384  | 70.1      | A''                     | Rocking                                      |
| 948  | 270.2     | A'                      | Umbrella                                     |
| 1666 | 46.2      | A''                     | Anti-symmetric Bending                       |
| 1671 | 35.3      | A'                      | Anti-symmetric Bending                       |
| 3393 | 380.4     | A'                      | Symmetric Hydrogen-Bonded OH Stretching      |
| 3442 | 1591.3    | A''                     | Anti-symmetric Hydrogen-Bonded OH Stretching |
| 3680 | 417.9     | A'                      | Free OH Stretching                           |

$\text{H}_3\text{O}^+\cdots\text{Ar}_3$ 

| Freq | Intensity | Symmetry Representation | Assignment                               |
|------|-----------|-------------------------|------------------------------------------|
| 19   | 1.7       | E                       | OH $\cdots$ Ar Intermolecular Bending    |
| 19   | 1.7       | E                       | OH $\cdots$ Ar Intermolecular Bending    |
| 36   | 8.7       | A <sub>1</sub>          | OH $\cdots$ Ar Intermolecular Umbrella   |
| 99   | 11.1      | A <sub>1</sub>          | OH $\cdots$ Ar Intermolecular Stretching |
| 151  | 55.8      | E                       | OH $\cdots$ Ar Intermolecular Stretching |
| 151  | 55.8      | E                       | OH $\cdots$ Ar Intermolecular Stretching |
| 339  | 0.0       | A <sub>2</sub>          | Hindered Rotation                        |
| 368  | 69.7      | E                       | Rocking                                  |
| 368  | 69.7      | E                       | Rocking                                  |
| 962  | 226.4     | A <sub>1</sub>          | Umbrella                                 |
| 1669 | 25.1      | E                       | Anti-symmetric Bending                   |
| 1669 | 25.1      | E                       | Anti-symmetric Bending                   |
| 3419 | 103.2     | A <sub>1</sub>          | Symmetric Stretching                     |
| 3492 | 1412.2    | E                       | Anti-symmetric Stretching                |
| 3492 | 1412.2    | E                       | Anti-symmetric Stretching                |

 $\text{H}_3\text{O}^+\cdots\text{N}_2$ 

| Freq | Intensity | Symmetry Representation | Assignment                                           |
|------|-----------|-------------------------|------------------------------------------------------|
| 138  | 1.1       | A''                     | N $\equiv$ N rotation                                |
| 140  | 3.3       | A'                      | N $\equiv$ N rotation                                |
| 244  | 82.2      | A'                      | OH $\cdots$ N <sub>2</sub> Intermolecular Stretching |
| 392  | 2.9       | A''                     | Hindered Rotation                                    |
| 499  | 138.3     | A'                      | Rocking                                              |
| 994  | 288.2     | A'                      | Umbrella                                             |
| 1660 | 38.6      | A'                      | Anti-symmetric Bending                               |
| 1696 | 58.2      | A''                     | Anti-symmetric Bending                               |
| 2173 | 31.9      | A'                      | N $\equiv$ N stretching                              |
| 2975 | 1841.8    | A'                      | Hydrogen-Bonded OH Stretching                        |
| 3635 | 253.2     | A'                      | Symmetric Free OH Stretching                         |
| 3725 | 389.1     | A''                     | Anti-symmetric Free OH Stretching                    |

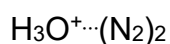

| Freq | Intensity | Symmetry Representation | Assignment                                           |
|------|-----------|-------------------------|------------------------------------------------------|
| 34   | 4.9       | A'                      | OH $\cdots$ N <sub>2</sub> Intermolecular Bending    |
| 128  | 0.1       | A''                     | N $\equiv$ N rotation                                |
| 129  | 5.0       | A'                      | N $\equiv$ N rotation                                |
| 129  | 1.2       | A''                     | N $\equiv$ N rotation                                |
| 152  | 1.8       | A'                      | N $\equiv$ N rotation                                |
| 209  | 26.2      | A'                      | OH $\cdots$ N <sub>2</sub> Intermolecular Stretching |
| 236  | 104.0     | A''                     | OH $\cdots$ N <sub>2</sub> Intermolecular Stretching |
| 349  | 85.2      | A'                      | Rocking                                              |
| 468  | 8.0       | A''                     | Hindered Rotation                                    |
| 658  | 81.0      | A''                     | Rocking                                              |
| 1009 | 255.7     | A'                      | Umbrella                                             |
| 1674 | 21.2      | A''                     | Anti-symmetric Bending                               |
| 1699 | 33.9      | A'                      | Anti-symmetric Bending                               |
| 2171 | 38.4      | A''                     | N $\equiv$ N stretching                              |
| 2171 | 10.7      | A'                      | N $\equiv$ N stretching                              |
| 3170 | 2519.5    | A''                     | Symmetric Hydrogen-Bonded OH Stretching              |
| 3176 | 660.2     | A'                      | Anti-symmetric Hydrogen-Bonded OH Stretching         |
| 3713 | 334.7     | A'                      | Free OH Stretching                                   |

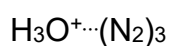

| Freq | Intensity | Symmetry Representation | Assignment                                           |
|------|-----------|-------------------------|------------------------------------------------------|
| 27   | 1.4       | E                       | OH $\cdots$ N <sub>2</sub> Intermolecular Bending    |
| 27   | 1.4       | E                       | OH $\cdots$ N <sub>2</sub> Intermolecular Bending    |
| 44   | 5.4       | A <sub>1</sub>          | OH $\cdots$ N <sub>2</sub> Intermolecular Umbrella   |
| 121  | 0.0       | A <sub>1</sub>          | N $\equiv$ N rotation                                |
| 122  | 1.3       | E                       | N $\equiv$ N rotation                                |
| 122  | 1.3       | E                       | N $\equiv$ N rotation                                |
| 140  | 1.2       | A <sub>2</sub>          | N $\equiv$ N rotation                                |
| 144  | 1.9       | E                       | N $\equiv$ N rotation                                |
| 144  | 1.9       | E                       | N $\equiv$ N rotation                                |
| 176  | 3.5       | A <sub>1</sub>          | OH $\cdots$ N <sub>2</sub> Intermolecular Stretching |



|      |        |                |                                               |
|------|--------|----------------|-----------------------------------------------|
| 228  | 72.4   | E              | OH...N <sub>2</sub> Intermolecular Stretching |
| 228  | 72.4   | E              | OH...N <sub>2</sub> Intermolecular Stretching |
| 557  | 0.0    | A <sub>2</sub> | Hindered Rotation                             |
| 618  | 78.3   | E              | Rocking                                       |
| 618  | 78.3   | E              | Rocking                                       |
| 1014 | 233.6  | A <sub>1</sub> | Umbrella                                      |
| 1692 | 15.1   | E              | Anti-symmetric Bending                        |
| 1692 | 15.1   | E              | Anti-symmetric Bending                        |
| 2169 | 29.0   | A <sub>1</sub> | N≡N stretching                                |
| 2169 | 29.0   | E              | N≡N stretching                                |
| 2170 | 1.5    | E              | N≡N stretching                                |
| 3285 | 122.4  | A <sub>1</sub> | Symmetric Stretching                          |
| 3307 | 2070.4 | E              | Anti-symmetric Stretching                     |
| 3307 | 2070.4 | E              | Anti-symmetric Stretching                     |

### H<sub>3</sub>O<sup>+</sup>...CO

| Freq | Intensity | Symmetry Representation | Assignment                        |
|------|-----------|-------------------------|-----------------------------------|
| 187  | 0.0       | A''                     | C≡O rotation                      |
| 191  | 2.9       | A'                      | C≡O rotation                      |
| 277  | 112.4     | A'                      | OH...CO Intermolecular Stretching |
| 498  | 0.0       | A''                     | Hindered Rotation                 |
| 555  | 190.2     | A'                      | Rocking                           |
| 1075 | 179.5     | A'                      | Umbrella                          |
| 1634 | 15.1      | A'                      | Anti-symmetric Bending            |
| 1687 | 33.5      | A''                     | Anti-symmetric Bending            |
| 2151 | 3.3       | A'                      | C≡O stretching                    |
| 2338 | 2843.8    | A'                      | Hydrogen-Bonded OH Stretching     |
| 3649 | 209.2     | A'                      | Symmetric Free OH Stretching      |
| 3748 | 350.7     | A''                     | Anti-symmetric Free OH Stretching |

### H<sub>3</sub>O<sup>+</sup>...(CO)<sub>2</sub>

| Freq | Intensity | Symmetry Representation | Assignment                     |
|------|-----------|-------------------------|--------------------------------|
| 39   | 3.8       | A'                      | OH...CO Intermolecular Bending |

|      |        |     |                                              |
|------|--------|-----|----------------------------------------------|
| 168  | 6.4    | A'  | C≡O rotation                                 |
| 172  | 2.3    | A'' | C≡O rotation                                 |
| 173  | 1.3    | A'' | C≡O rotation                                 |
| 195  | 15.7   | A'  | C≡O rotation                                 |
| 245  | 8.8    | A'  | OH··CO Intermolecular Stretching             |
| 253  | 126.8  | A'' | OH··CO Intermolecular Stretching             |
| 393  | 92.4   | A'  | Rocking                                      |
| 579  | 12.8   | A'' | Hindered Rotation                            |
| 806  | 64.5   | A'' | Rocking                                      |
| 1053 | 167.1  | A'  | Umbrella                                     |
| 1667 | 0.8    | A'' | Anti-symmetric Bending                       |
| 1693 | 11.7   | A'  | Anti-symmetric Bending                       |
| 2136 | 0.5    | A'  | C≡O stretching                               |
| 2137 | 0.5    | A'' | C≡O stretching                               |
| 2809 | 3538.4 | A'' | Symmetric Hydrogen-Bonded OH Stretching      |
| 2874 | 858.4  | A'  | Anti-symmetric Hydrogen-Bonded OH Stretching |
| 3732 | 280.7  | A'  | Free OH Stretching                           |

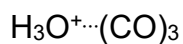

| Freq | Intensity | Symmetry Representation | Assignment                       |
|------|-----------|-------------------------|----------------------------------|
| 31   | 1.0       | E                       | OH··CO Intermolecular Bending    |
| 31   | 1.0       | E                       | OH··CO Intermolecular Bending    |
| 47   | 3.8       | A <sub>1</sub>          | OH··CO Intermolecular Umbrella   |
| 160  | 3.6       | A <sub>1</sub>          | C≡O rotation                     |
| 161  | 3.4       | E                       | C≡O rotation                     |
| 161  | 3.4       | E                       | C≡O rotation                     |
| 162  | 0.0       | A <sub>2</sub>          | C≡O rotation                     |
| 189  | 18.2      | E                       | C≡O rotation                     |
| 189  | 18.2      | E                       | C≡O rotation                     |
| 216  | 0.3       | A <sub>1</sub>          | OH··CO Intermolecular Stretching |
| 249  | 57.2      | E                       | OH··CO Intermolecular Stretching |
| 249  | 57.2      | E                       | OH··CO Intermolecular Stretching |
| 694  | 0.0       | A <sub>2</sub>          | Hindered Rotation                |
| 735  | 62.6      | E                       | Rocking                          |

|      |        |                |                           |
|------|--------|----------------|---------------------------|
| 735  | 62.6   | E              | Rocking                   |
| 1040 | 155.3  | A <sub>1</sub> | Umbrella                  |
| 1690 | 0.5    | E              | Anti-symmetric Bending    |
| 1690 | 0.5    | E              | Anti-symmetric Bending    |
| 2127 | 0.3    | A <sub>1</sub> | C≡O stretching            |
| 2129 | 3.5    | E              | C≡O stretching            |
| 2129 | 3.5    | E              | C≡O stretching            |
| 3079 | 2658.5 | E              | Anti-symmetric Stretching |
| 3079 | 2658.5 | E              | Anti-symmetric Stretching |
| 3096 | 140.4  | A <sub>1</sub> | Symmetric Stretching      |

**Table S3. Energy and Intrinsic IR Intensities of Selected FBR Basis**

As mentioned in the main text, we expand the Hamiltonian using FBR basis function  $|T_i, b_j, s_k\rangle$ . The following tables shows the FBR basis kets in the region of  $4000 - 7000\text{cm}^{-1}$  with their zeroth-order transition energy  $\omega$  (from  $\langle T_0, b_0, s_0 |$ ). This transition energy are plotted in Fig. 4-6 as the filled- and empty-circles. The intrinsic IR Intensities  $I$ , that is, the IR intensity obtained from the transition dipole  $\langle T_0, b_0, s_0 | \hat{\mu} | T_i, b_j, s_k \rangle$ , are also listed in the tables. We call it "intrinsic" IR intensity since the intensity is not borrowed from other bright states in this picture.

---

$\text{H}_3\text{O}^+ \dots \text{Ar}_1$ , CCSD/aTZ 2MR // MP2/aDZ 4MR

---

| $\omega$ | $I$ | Label                                                 |
|----------|-----|-------------------------------------------------------|
| 4761.2   | 0.5 | $ T^0, b^1, s_{\text{HB}}^1\rangle$                   |
| 4800.9   | 2.8 | $ T^0, b^1, s_{\text{HB}}^1\rangle$                   |
| 4930.8   | 0.1 | $ T^0, b^3, s^0\rangle$                               |
| 4933.8   | 0.0 | $ T^0, b^3, s^0\rangle$                               |
| 4947.3   | 0.0 | $ T^1, b^1, s_{\text{HB}}^1\rangle$                   |
| 4958.1   | 0.0 | $ T^0, b^3, s^0\rangle$                               |
| 4960.9   | 0.0 | $ T^0, b^3, s^0\rangle$                               |
| 4987.3   | 0.0 | $ T^1, b^1, s_{\text{HB}}^1\rangle$                   |
| 5109.1   | 0.8 | $ T^0, b^1, s_{\text{free}}^1\rangle$                 |
| 5127.9   | 0.7 | $ T^0, b^1, s_{\text{free}}^1\rangle$                 |
| 5151.4   | 2.2 | $ T^0, b^1, s_{\text{free}}^1\rangle$                 |
| 5178.1   | 2.5 | $ T^0, b^1, s_{\text{free}}^1\rangle$                 |
| 5274.0   | 0.0 | $ T^1, b^1, s_{\text{free}}^1\rangle$                 |
| 5292.2   | 0.0 | $ T^1, b^1, s_{\text{free}}^1\rangle$                 |
| 6164.0   | 2.5 | $ T^0, b^0, s_{\text{HB}}^2\rangle$                   |
| 6372.1   | 0.0 | $ T^1, b^0, s_{\text{HB}}^2\rangle$                   |
| 6382.6   | 0.0 | $ T^0, b^2, s_{\text{HB}}^1\rangle$                   |
| 6401.8   | 0.0 | $ T^0, b^2, s_{\text{HB}}^1\rangle$                   |
| 6407.0   | 0.0 | $ T^0, b^2, s_{\text{HB}}^1\rangle$                   |
| 6656.1   | 0.2 | $ T^0, b^0, s_{\text{HB}}^1 s_{\text{free}}^1\rangle$ |
| 6714.4   | 0.4 | $ T^0, b^0, s_{\text{HB}}^1 s_{\text{free}}^1\rangle$ |
| 6725.8   | 0.0 | $ T^0, b^2, s_{\text{free}}^1\rangle$                 |
| 6746.8   | 0.0 | $ T^0, b^2, s_{\text{free}}^1\rangle$                 |
| 6752.3   | 0.0 | $ T^0, b^2, s_{\text{free}}^1\rangle$                 |
| 6763.0   | 0.0 | $ T^0, b^2, s_{\text{free}}^1\rangle$                 |
| 6787.2   | 0.0 | $ T^0, b^2, s_{\text{free}}^1\rangle$                 |
| 6795.8   | 0.0 | $ T^0, b^2, s_{\text{free}}^1\rangle$                 |
| 6839.8   | 0.0 | $ T^1, b^0, s_{\text{HB}}^1 s_{\text{free}}^1\rangle$ |
| 6876.0   | 2.1 | $ T^0, b^0, s_{\text{free}}^2\rangle$                 |
| 6889.6   | 4.0 | $ T^0, b^0, s_{\text{free}}^2\rangle$                 |
| 6897.9   | 0.0 | $ T^1, b^0, s_{\text{HB}}^1 s_{\text{free}}^1\rangle$ |

| $\omega$ | $I$ | Label                                 |        |     |                                                       |
|----------|-----|---------------------------------------|--------|-----|-------------------------------------------------------|
| 4837.3   | 2.4 | $ T^0, b^1, s_{\text{HB}}^1\rangle$   | 6255.9 | 3.8 | $ T^0, b^0, s_{\text{HB}}^2\rangle$                   |
| 4857.0   | 2.0 | $ T^0, b^1, s_{\text{HB}}^1\rangle$   | 6407.1 | 0.0 | $ T^1, b^0, s_{\text{HB}}^2\rangle$                   |
| 4862.6   | 0.1 | $ T^0, b^1, s_{\text{HB}}^1\rangle$   | 6409.1 | 0.0 | $ T^1, b^0, s_{\text{HB}}^2\rangle$                   |
| 4872.1   | 2.2 | $ T^0, b^1, s_{\text{HB}}^1\rangle$   | 6439.4 | 0.0 | $ T^1, b^0, s_{\text{HB}}^2\rangle$                   |
| 4932.0   | 0.1 | $ T^0, b^3, s^0\rangle$               | 6456.5 | 0.0 | $ T^0, b^2, s_{\text{HB}}^1\rangle$                   |
| 4936.7   | 0.1 | $ T^0, b^3, s^0\rangle$               | 6463.5 | 0.1 | $ T^0, b^2, s_{\text{HB}}^1\rangle$                   |
| 4960.0   | 0.0 | $ T^0, b^3, s^0\rangle$               | 6464.9 | 0.0 | $ T^0, b^2, s_{\text{HB}}^1\rangle$                   |
| 4963.1   | 0.0 | $ T^0, b^3, s^0\rangle$               | 6487.3 | 0.0 | $ T^0, b^2, s_{\text{HB}}^1\rangle$                   |
| 4982.7   | 0.0 | $ T^1, b^1, s_{\text{HB}}^1\rangle$   | 6490.1 | 0.0 | $ T^0, b^2, s_{\text{HB}}^1\rangle$                   |
| 5002.4   | 0.0 | $ T^1, b^1, s_{\text{HB}}^1\rangle$   | 6493.5 | 0.0 | $ T^0, b^2, s_{\text{HB}}^1\rangle$                   |
| 5006.6   | 0.0 | $ T^1, b^1, s_{\text{HB}}^1\rangle$   | 6496.6 | 0.2 | $ T^0, b^0, s_{\text{HB}}^2\rangle$                   |
| 5016.2   | 0.0 | $ T^1, b^1, s_{\text{HB}}^1\rangle$   | 6676.6 | 0.0 | $ T^1, b^0, s_{\text{HB}}^2\rangle$                   |
| 5016.6   | 0.0 | $ T^1, b^1, s_{\text{HB}}^1\rangle$   | 6757.6 | 0.0 | $ T^0, b^2, s_{\text{free}}^1\rangle$                 |
| 5034.1   | 0.0 | $ T^1, b^1, s_{\text{HB}}^1\rangle$   | 6771.4 | 0.1 | $ T^0, b^0, s_{\text{HB}}^1 s_{\text{free}}^1\rangle$ |
| 5038.7   | 0.0 | $ T^1, b^1, s_{\text{HB}}^1\rangle$   | 6777.1 | 0.8 | $ T^0, b^0, s_{\text{HB}}^1 s_{\text{free}}^1\rangle$ |
| 5046.3   | 0.0 | $ T^1, b^1, s_{\text{HB}}^1\rangle$   | 6785.5 | 0.0 | $ T^0, b^2, s_{\text{free}}^1\rangle$                 |
| 5142.5   | 1.9 | $ T^0, b^1, s_{\text{free}}^1\rangle$ | 6805.6 | 0.0 | $ T^0, b^2, s_{\text{free}}^1\rangle$                 |
| 5182.5   | 1.5 | $ T^0, b^1, s_{\text{free}}^1\rangle$ | 6919.5 | 0.0 | $ T^1, b^0, s_{\text{HB}}^1 s_{\text{free}}^1\rangle$ |
| 5310.7   | 0.0 | $ T^1, b^1, s_{\text{free}}^1\rangle$ | 6947.1 | 0.0 | $ T^1, b^0, s_{\text{HB}}^1 s_{\text{free}}^1\rangle$ |
| 5352.6   | 0.0 | $ T^1, b^1, s_{\text{free}}^1\rangle$ | 6949.6 | 0.0 | $ T^1, b^0, s_{\text{HB}}^1 s_{\text{free}}^1\rangle$ |
| 6253.7   | 0.7 | $ T^0, b^0, s_{\text{HB}}^2\rangle$   | 6954.5 | 2.5 | $ T^0, b^0, s_{\text{free}}^2\rangle$                 |

|        |     |                         |        |     |                         |
|--------|-----|-------------------------|--------|-----|-------------------------|
|        |     |                         | 6392.8 | 2.4 | $ T^0, b^0, s^2\rangle$ |
| 4900.3 | 2.2 | $ T^0, b^1, s^1\rangle$ | 6486.8 | 0.0 | $ T^1, b^0, s^2\rangle$ |
| 4902.9 | 2.4 | $ T^0, b^1, s^1\rangle$ | 6500.8 | 0.0 | $ T^1, b^0, s^2\rangle$ |
| 4918.9 | 0.3 | $ T^0, b^1, s^1\rangle$ | 6506.5 | 0.0 | $ T^1, b^0, s^2\rangle$ |
| 4924.5 | 2.3 | $ T^0, b^1, s^1\rangle$ | 6522.4 | 0.1 | $ T^0, b^2, s^1\rangle$ |
| 4925.1 | 0.8 | $ T^0, b^1, s^1\rangle$ | 6522.4 | 0.1 | $ T^0, b^2, s^1\rangle$ |
| 4928.0 | 2.6 | $ T^0, b^1, s^1\rangle$ | 6533.4 | 0.0 | $ T^1, b^0, s^2\rangle$ |
| 4937.2 | 0.1 | $ T^0, b^3, s^0\rangle$ | 6534.0 | 0.0 | $ T^0, b^2, s^1\rangle$ |
| 4937.2 | 0.1 | $ T^0, b^3, s^0\rangle$ | 6534.3 | 0.0 | $ T^0, b^2, s^1\rangle$ |
| 4964.6 | 0.0 | $ T^0, b^3, s^0\rangle$ | 6534.5 | 0.0 | $ T^0, b^2, s^1\rangle$ |
| 5010.8 | 0.0 | $ T^1, b^1, s^1\rangle$ | 6535.0 | 0.0 | $ T^0, b^2, s^1\rangle$ |
| 5013.5 | 0.0 | $ T^1, b^1, s^1\rangle$ | 6540.6 | 0.0 | $ T^0, b^2, s^1\rangle$ |
| 5028.9 | 0.0 | $ T^1, b^1, s^1\rangle$ | 6551.6 | 0.0 | $ T^1, b^0, s^2\rangle$ |
| 5035.1 | 0.0 | $ T^1, b^1, s^1\rangle$ | 6553.0 | 0.0 | $ T^0, b^2, s^1\rangle$ |
| 5035.1 | 0.0 | $ T^1, b^1, s^1\rangle$ | 6553.1 | 0.0 | $ T^1, b^0, s^2\rangle$ |
| 5038.5 | 0.0 | $ T^1, b^1, s^1\rangle$ | 6553.4 | 0.0 | $ T^0, b^2, s^1\rangle$ |
| 5062.2 | 0.0 | $ T^1, b^1, s^1\rangle$ | 6556.3 | 0.0 | $ T^1, b^0, s^2\rangle$ |
| 5066.5 | 0.0 | $ T^1, b^1, s^1\rangle$ | 6558.4 | 0.0 | $ T^1, b^0, s^2\rangle$ |
| 5072.0 | 0.0 | $ T^1, b^1, s^1\rangle$ | 6574.6 | 0.0 | $ T^1, b^0, s^2\rangle$ |
| 5072.9 | 0.0 | $ T^1, b^1, s^1\rangle$ | 6590.6 | 0.2 | $ T^0, b^0, s^2\rangle$ |
| 5082.5 | 0.0 | $ T^1, b^1, s^1\rangle$ | 6596.1 | 0.2 | $ T^0, b^0, s^2\rangle$ |
| 5086.0 | 0.0 | $ T^1, b^1, s^1\rangle$ | 6600.5 | 0.2 | $ T^0, b^0, s^2\rangle$ |
| 5088.8 | 0.0 | $ T^1, b^1, s^1\rangle$ | 6703.4 | 0.0 | $ T^1, b^0, s^2\rangle$ |
| 5089.3 | 0.0 | $ T^1, b^1, s^1\rangle$ | 6708.3 | 0.0 | $ T^1, b^0, s^2\rangle$ |
| 5090.4 | 0.0 | $ T^1, b^1, s^1\rangle$ | 6713.3 | 0.0 | $ T^1, b^0, s^2\rangle$ |
| 5091.6 | 0.0 | $ T^1, b^1, s^1\rangle$ | 6757.5 | 0.0 | $ T^1, b^0, s^2\rangle$ |
| 5093.7 | 0.0 | $ T^1, b^1, s^1\rangle$ | 6761.1 | 0.0 | $ T^1, b^0, s^2\rangle$ |
| 5099.0 | 0.0 | $ T^1, b^1, s^1\rangle$ | 6762.6 | 0.0 | $ T^1, b^0, s^2\rangle$ |
| 6373.2 | 1.1 | $ T^0, b^0, s^2\rangle$ | 6763.7 | 0.0 | $ T^1, b^0, s^2\rangle$ |
| 6387.0 | 1.7 | $ T^0, b^0, s^2\rangle$ | 6766.5 | 0.0 | $ T^1, b^0, s^2\rangle$ |

| $\omega$ | $I$  | Label                                 |        |     |                                                       |
|----------|------|---------------------------------------|--------|-----|-------------------------------------------------------|
| 4367.1   | 0.7  | $ T^0, b^1, s_{\text{HB}}^1\rangle$   | 5981.5 | 0.0 | $ T^0, b^2, s_{\text{HB}}^1\rangle$                   |
| 4378.8   | 4.7  | $ T^0, b^1, s_{\text{HB}}^1\rangle$   | 6001.1 | 0.0 | $ T^0, b^2, s_{\text{HB}}^1\rangle$                   |
| 4661.8   | 0.0  | $ T^1, b^1, s_{\text{HB}}^1\rangle$   | 6004.6 | 0.0 | $ T^0, b^2, s_{\text{HB}}^1\rangle$                   |
| 4676.4   | 0.0  | $ T^1, b^1, s_{\text{HB}}^1\rangle$   | 6267.5 | 0.3 | $ T^0, b^0, s_{\text{HB}}^1 s_{\text{free}}^1\rangle$ |
| 4923.8   | 0.0  | $ T^0, b^3, s^0\rangle$               | 6334.9 | 0.3 | $ T^0, b^0, s_{\text{HB}}^1 s_{\text{free}}^1\rangle$ |
| 4968.9   | 0.0  | $ T^0, b^3, s^0\rangle$               | 6561.7 | 0.0 | $ T^1, b^0, s_{\text{HB}}^1 s_{\text{free}}^1\rangle$ |
| 5003.2   | 0.0  | $ T^0, b^3, s^0\rangle$               | 6628.4 | 0.0 | $ T^1, b^0, s_{\text{HB}}^1 s_{\text{free}}^1\rangle$ |
| 5014.5   | 0.0  | $ T^0, b^3, s^0\rangle$               | 6738.4 | 0.0 | $ T^0, b^2, s_{\text{free}}^1\rangle$                 |
| 5129.2   | 0.5  | $ T^0, b^1, s_{\text{free}}^1\rangle$ | 6777.5 | 0.0 | $ T^0, b^2, s_{\text{free}}^1\rangle$                 |
| 5177.7   | 2.3  | $ T^0, b^1, s_{\text{free}}^1\rangle$ | 6795.3 | 0.0 | $ T^0, b^2, s_{\text{free}}^1\rangle$                 |
| 5180.0   | 0.6  | $ T^0, b^1, s_{\text{free}}^1\rangle$ | 6835.9 | 0.0 | $ T^0, b^2, s_{\text{free}}^1\rangle$                 |
| 5236.1   | 2.4  | $ T^0, b^1, s_{\text{free}}^1\rangle$ | 6841.5 | 0.0 | $ T^0, b^2, s_{\text{free}}^1\rangle$                 |
| 5299.5   | 19.2 | $ T^0, b^0, s_{\text{HB}}^2\rangle$   | 6889.0 | 0.0 | $ T^0, b^2, s_{\text{free}}^1\rangle$                 |
| 5385.4   | 0.0  | $ T^1, b^1, s_{\text{free}}^1\rangle$ | 6926.7 | 2.1 | $ T^0, b^0, s_{\text{free}}^2\rangle$                 |
| 5636.4   | 0.3  | $ T^1, b^0, s_{\text{HB}}^2\rangle$   | 6942.4 | 4.1 | $ T^0, b^0, s_{\text{free}}^2\rangle$                 |

| $\omega$ | $I$ | Label                                 |        |      |                                                       |
|----------|-----|---------------------------------------|--------|------|-------------------------------------------------------|
| 4587.0   | 2.7 | $ T^0, b^1, s_{\text{HB}}^1\rangle$   | 5641.7 | 3.6  | $ T^0, b^0, s_{\text{HB}}^2\rangle$                   |
| 4588.3   | 3.5 | $ T^0, b^1, s_{\text{HB}}^1\rangle$   | 5663.9 | 15.4 | $ T^0, b^0, s_{\text{HB}}^2\rangle$                   |
| 4658.0   | 3.6 | $ T^0, b^1, s_{\text{HB}}^1\rangle$   | 5900.2 | 0.1  | $ T^1, b^0, s_{\text{HB}}^2\rangle$                   |
| 4671.7   | 0.1 | $ T^0, b^1, s_{\text{HB}}^1\rangle$   | 5910.1 | 0.0  | $ T^1, b^0, s_{\text{HB}}^2\rangle$                   |
| 4835.3   | 0.0 | $ T^1, b^1, s_{\text{HB}}^1\rangle$   | 5921.4 | 0.0  | $ T^1, b^0, s_{\text{HB}}^2\rangle$                   |
| 4838.9   | 0.0 | $ T^1, b^1, s_{\text{HB}}^1\rangle$   | 5932.4 | 0.0  | $ T^1, b^0, s_{\text{HB}}^2\rangle$                   |
| 4846.2   | 0.0 | $ T^1, b^1, s_{\text{HB}}^1\rangle$   | 6039.9 | 0.2  | $ T^0, b^0, s_{\text{HB}}^2\rangle$                   |
| 4846.2   | 0.0 | $ T^1, b^1, s_{\text{HB}}^1\rangle$   | 6219.6 | 0.0  | $ T^0, b^2, s_{\text{HB}}^1\rangle$                   |
| 4903.9   | 0.0 | $ T^1, b^1, s_{\text{HB}}^1\rangle$   | 6224.6 | 0.0  | $ T^0, b^2, s_{\text{HB}}^1\rangle$                   |
| 4917.0   | 0.0 | $ T^1, b^1, s_{\text{HB}}^1\rangle$   | 6225.5 | 0.0  | $ T^0, b^2, s_{\text{HB}}^1\rangle$                   |
| 4919.9   | 0.0 | $ T^1, b^1, s_{\text{HB}}^1\rangle$   | 6288.8 | 0.0  | $ T^1, b^0, s_{\text{HB}}^2\rangle$                   |
| 4929.5   | 0.0 | $ T^1, b^1, s_{\text{HB}}^1\rangle$   | 6293.8 | 0.0  | $ T^0, b^2, s_{\text{HB}}^1\rangle$                   |
| 4974.7   | 0.0 | $ T^0, b^3, s^0\rangle$               | 6311.2 | 0.0  | $ T^0, b^2, s_{\text{HB}}^1\rangle$                   |
| 5003.7   | 0.0 | $ T^0, b^3, s^0\rangle$               | 6322.0 | 0.0  | $ T^0, b^2, s_{\text{HB}}^1\rangle$                   |
| 5029.9   | 0.0 | $ T^0, b^3, s^0\rangle$               | 6535.0 | 0.0  | $ T^0, b^0, s_{\text{HB}}^1 s_{\text{free}}^1\rangle$ |
| 5046.7   | 0.0 | $ T^0, b^3, s^0\rangle$               | 6598.5 | 0.6  | $ T^0, b^0, s_{\text{HB}}^1 s_{\text{free}}^1\rangle$ |
| 5199.9   | 1.5 | $ T^0, b^1, s_{\text{free}}^1\rangle$ | 6783.8 | 0.0  | $ T^1, b^0, s_{\text{HB}}^1 s_{\text{free}}^1\rangle$ |
| 5257.0   | 1.6 | $ T^0, b^1, s_{\text{free}}^1\rangle$ | 6792.6 | 0.0  | $ T^1, b^0, s_{\text{HB}}^1 s_{\text{free}}^1\rangle$ |
| 5443.4   | 0.0 | $ T^1, b^1, s_{\text{free}}^1\rangle$ | 6817.9 | 0.0  | $ T^0, b^2, s_{\text{free}}^1\rangle$                 |
| 5451.9   | 0.0 | $ T^1, b^1, s_{\text{free}}^1\rangle$ | 6844.9 | 0.0  | $ T^1, b^0, s_{\text{HB}}^1 s_{\text{free}}^1\rangle$ |
| 5502.7   | 0.0 | $ T^1, b^1, s_{\text{free}}^1\rangle$ | 6856.1 | 0.0  | $ T^1, b^0, s_{\text{HB}}^1 s_{\text{free}}^1\rangle$ |
| 5507.7   | 0.0 | $ T^1, b^1, s_{\text{free}}^1\rangle$ | 6875.0 | 0.0  | $ T^0, b^2, s_{\text{free}}^1\rangle$                 |
|          |     |                                       | 6926.8 | 0.0  | $ T^0, b^2, s_{\text{free}}^1\rangle$                 |



| $\omega$ | $I$ | Label                   | $\omega$ | $I$ | Label                   |
|----------|-----|-------------------------|----------|-----|-------------------------|
| 4753.2   | 2.8 | $ T^0, b^1, s^1\rangle$ | 6019.7   | 6.3 | $ T^0, b^0, s^2\rangle$ |
| 4758.8   | 3.2 | $ T^0, b^1, s^1\rangle$ | 6233.2   | 0.0 | $ T^1, b^0, s^2\rangle$ |
| 4781.2   | 3.6 | $ T^0, b^1, s^1\rangle$ | 6244.2   | 0.0 | $ T^1, b^0, s^2\rangle$ |
| 4782.4   | 3.2 | $ T^0, b^1, s^1\rangle$ | 6258.1   | 0.0 | $ T^1, b^0, s^2\rangle$ |
| 4832.0   | 0.4 | $ T^0, b^1, s^1\rangle$ | 6261.1   | 0.0 | $ T^1, b^0, s^2\rangle$ |
| 4836.9   | 1.1 | $ T^0, b^1, s^1\rangle$ | 6265.4   | 0.0 | $ T^1, b^0, s^2\rangle$ |
| 4998.1   | 0.0 | $ T^1, b^1, s^1\rangle$ | 6271.1   | 0.3 | $ T^0, b^0, s^2\rangle$ |
| 5003.2   | 0.0 | $ T^1, b^1, s^1\rangle$ | 6273.1   | 0.0 | $ T^1, b^0, s^2\rangle$ |
| 5004.2   | 0.0 | $ T^1, b^1, s^1\rangle$ | 6284.8   | 0.2 | $ T^0, b^0, s^2\rangle$ |
| 5008.2   | 0.0 | $ T^1, b^1, s^1\rangle$ | 6296.5   | 0.0 | $ T^1, b^0, s^2\rangle$ |
| 5026.8   | 0.0 | $ T^1, b^1, s^1\rangle$ | 6317.3   | 0.0 | $ T^1, b^0, s^2\rangle$ |
| 5028.5   | 0.0 | $ T^1, b^1, s^1\rangle$ | 6326.9   | 0.0 | $ T^1, b^0, s^2\rangle$ |
| 5029.7   | 0.1 | $ T^0, b^3, s^0\rangle$ | 6341.6   | 0.2 | $ T^0, b^0, s^2\rangle$ |
| 5029.8   | 0.1 | $ T^0, b^3, s^0\rangle$ | 6407.3   | 0.1 | $ T^0, b^2, s^1\rangle$ |
| 5030.7   | 0.0 | $ T^1, b^1, s^1\rangle$ | 6410.8   | 0.1 | $ T^0, b^2, s^1\rangle$ |
| 5031.2   | 0.0 | $ T^1, b^1, s^1\rangle$ | 6417.5   | 0.0 | $ T^0, b^2, s^1\rangle$ |
| 5054.2   | 0.0 | $ T^0, b^3, s^0\rangle$ | 6418.1   | 0.0 | $ T^0, b^2, s^1\rangle$ |
| 5058.1   | 0.0 | $ T^1, b^1, s^1\rangle$ | 6421.1   | 0.0 | $ T^0, b^2, s^1\rangle$ |
| 5063.7   | 0.0 | $ T^1, b^1, s^1\rangle$ | 6421.6   | 0.0 | $ T^0, b^2, s^1\rangle$ |
| 5079.1   | 0.0 | $ T^1, b^1, s^1\rangle$ | 6485.7   | 0.0 | $ T^0, b^2, s^1\rangle$ |
| 5080.5   | 0.0 | $ T^1, b^1, s^1\rangle$ | 6496.5   | 0.0 | $ T^0, b^2, s^1\rangle$ |
| 5084.7   | 0.0 | $ T^1, b^1, s^1\rangle$ | 6497.4   | 0.0 | $ T^0, b^2, s^1\rangle$ |
| 5084.8   | 0.0 | $ T^1, b^1, s^1\rangle$ | 6517.6   | 0.0 | $ T^1, b^0, s^2\rangle$ |
| 5086.2   | 0.0 | $ T^1, b^1, s^1\rangle$ | 6519.7   | 0.0 | $ T^1, b^0, s^2\rangle$ |
| 5087.3   | 0.0 | $ T^1, b^1, s^1\rangle$ | 6531.8   | 0.0 | $ T^1, b^0, s^2\rangle$ |
| 5136.8   | 0.0 | $ T^1, b^1, s^1\rangle$ | 6532.9   | 0.0 | $ T^1, b^0, s^2\rangle$ |
| 5141.8   | 0.0 | $ T^1, b^1, s^1\rangle$ | 6589.3   | 0.0 | $ T^1, b^0, s^2\rangle$ |
| 5989.2   | 1.6 | $ T^0, b^0, s^2\rangle$ | 6589.7   | 0.0 | $ T^1, b^0, s^2\rangle$ |
| 6010.1   | 5.2 | $ T^0, b^0, s^2\rangle$ | 6591.2   | 0.0 | $ T^1, b^0, s^2\rangle$ |

| $\omega$ | $I$   | Label                                 |        |     |                                                       |
|----------|-------|---------------------------------------|--------|-----|-------------------------------------------------------|
| 4136.9   | 0.0   | $ T^1, b^1, s_{\text{HB}}^1\rangle$   | 5421.2 | 0.0 | $ T^1, b^1, s_{\text{free}}^1\rangle$                 |
| 4162.3   | 0.0   | $ T^1, b^1, s_{\text{HB}}^1\rangle$   | 5456.0 | 0.0 | $ T^1, b^1, s_{\text{free}}^1\rangle$                 |
| 4178.9   | 122.0 | $ T^0, b^0, s_{\text{HB}}^2\rangle$   | 5478.5 | 0.0 | $ T^1, b^1, s_{\text{free}}^1\rangle$                 |
| 4595.5   | 2.5   | $ T^1, b^0, s_{\text{HB}}^2\rangle$   | 5736.5 | 0.5 | $ T^0, b^0, s_{\text{HB}}^1 s_{\text{free}}^1\rangle$ |
| 4895.6   | 0.0   | $ T^0, b^3, s^0\rangle$               | 5820.3 | 0.2 | $ T^0, b^0, s_{\text{HB}}^1 s_{\text{free}}^1\rangle$ |
| 4928.0   | 0.0   | $ T^0, b^3, s^0\rangle$               | 6087.2 | 0.0 | $ T^1, b^0, s_{\text{HB}}^1 s_{\text{free}}^1\rangle$ |
| 4952.9   | 0.0   | $ T^0, b^3, s^0\rangle$               | 6169.4 | 0.0 | $ T^1, b^0, s_{\text{HB}}^1 s_{\text{free}}^1\rangle$ |
| 4958.3   | 0.1   | $ T^0, b^3, s^0\rangle$               | 6621.6 | 2.1 | $ T^0, b^0, s_{\text{free}}^2\rangle$                 |
| 5130.4   | 0.2   | $ T^0, b^1, s_{\text{free}}^1\rangle$ | 6731.7 | 0.0 | $ T^0, b^2, s_{\text{free}}^1\rangle$                 |
| 5176.0   | 0.5   | $ T^0, b^1, s_{\text{free}}^1\rangle$ | 6779.7 | 0.0 | $ T^0, b^2, s_{\text{free}}^1\rangle$                 |
| 5187.9   | 2.6   | $ T^0, b^1, s_{\text{free}}^1\rangle$ | 6779.7 | 0.0 | $ T^0, b^2, s_{\text{free}}^1\rangle$                 |
| 5241.2   | 2.1   | $ T^0, b^1, s_{\text{free}}^1\rangle$ | 6815.8 | 0.0 | $ T^0, b^2, s_{\text{free}}^1\rangle$                 |
| 5360.1   | 0.0   | $ T^0, b^2, s_{\text{HB}}^1\rangle$   | 6835.0 | 0.0 | $ T^0, b^2, s_{\text{free}}^1\rangle$                 |
| 5386.1   | 0.0   | $ T^0, b^2, s_{\text{HB}}^1\rangle$   | 6878.3 | 0.0 | $ T^0, b^2, s_{\text{free}}^1\rangle$                 |
| 5398.2   | 0.0   | $ T^0, b^2, s_{\text{HB}}^1\rangle$   | 6951.4 | 2.2 | $ T^0, b^0, s_{\text{free}}^2\rangle$                 |
|          |       |                                       | 6972.3 | 3.9 | $ T^0, b^0, s_{\text{free}}^2\rangle$                 |

| $\omega$ | $I$  | Label                                 |        |     |                                                       |
|----------|------|---------------------------------------|--------|-----|-------------------------------------------------------|
| 4206.8   | 3.5  | $ T^0, b^1, s_{\text{HB}}^1\rangle$   | 5228.9 | 0.2 | $ T^1, b^0, s_{\text{HB}}^2\rangle$                   |
| 4210.1   | 2.2  | $ T^0, b^1, s_{\text{HB}}^1\rangle$   | 5263.1 | 1.5 | $ T^0, b^1, s_{\text{free}}^1\rangle$                 |
| 4341.5   | 6.0  | $ T^0, b^1, s_{\text{HB}}^1\rangle$   | 5445.0 | 0.4 | $ T^0, b^0, s_{\text{HB}}^2\rangle$                   |
| 4354.6   | 0.0  | $ T^0, b^1, s_{\text{HB}}^1\rangle$   | 5469.0 | 0.0 | $ T^1, b^1, s_{\text{free}}^1\rangle$                 |
| 4468.8   | 0.0  | $ T^1, b^1, s_{\text{HB}}^1\rangle$   | 5522.7 | 0.0 | $ T^1, b^1, s_{\text{free}}^1\rangle$                 |
| 4470.2   | 0.0  | $ T^1, b^1, s_{\text{HB}}^1\rangle$   | 5578.6 | 0.0 | $ T^1, b^1, s_{\text{free}}^1\rangle$                 |
| 4530.4   | 0.1  | $ T^1, b^1, s_{\text{HB}}^1\rangle$   | 5704.8 | 0.0 | $ T^1, b^0, s_{\text{HB}}^2\rangle$                   |
| 4536.5   | 0.0  | $ T^1, b^1, s_{\text{HB}}^1\rangle$   | 5823.7 | 0.1 | $ T^0, b^2, s_{\text{HB}}^1\rangle$                   |
| 4599.7   | 0.0  | $ T^1, b^1, s_{\text{HB}}^1\rangle$   | 5827.4 | 0.0 | $ T^0, b^2, s_{\text{HB}}^1\rangle$                   |
| 4614.5   | 0.0  | $ T^1, b^1, s_{\text{HB}}^1\rangle$   | 5827.7 | 0.0 | $ T^0, b^2, s_{\text{HB}}^1\rangle$                   |
| 4668.5   | 0.0  | $ T^1, b^1, s_{\text{HB}}^1\rangle$   | 5962.2 | 0.0 | $ T^0, b^2, s_{\text{HB}}^1\rangle$                   |
| 4678.6   | 0.0  | $ T^1, b^1, s_{\text{HB}}^1\rangle$   | 5977.7 | 0.0 | $ T^0, b^2, s_{\text{HB}}^1\rangle$                   |
| 4847.7   | 15.5 | $ T^0, b^0, s_{\text{HB}}^2\rangle$   | 5988.6 | 0.0 | $ T^0, b^2, s_{\text{HB}}^1\rangle$                   |
| 4891.4   | 57.0 | $ T^0, b^0, s_{\text{HB}}^2\rangle$   | 6193.0 | 0.0 | $ T^0, b^0, s_{\text{HB}}^1 s_{\text{free}}^1\rangle$ |
| 4945.1   | 0.0  | $ T^0, b^3, s^0\rangle$               | 6316.3 | 0.7 | $ T^0, b^0, s_{\text{HB}}^1 s_{\text{free}}^1\rangle$ |
| 4968.8   | 0.0  | $ T^0, b^3, s^0\rangle$               | 6455.3 | 0.0 | $ T^1, b^0, s_{\text{HB}}^1 s_{\text{free}}^1\rangle$ |
| 4992.5   | 0.0  | $ T^0, b^3, s^0\rangle$               | 6516.9 | 0.0 | $ T^1, b^0, s_{\text{HB}}^1 s_{\text{free}}^1\rangle$ |
| 5007.8   | 0.0  | $ T^0, b^3, s^0\rangle$               | 6576.6 | 0.0 | $ T^1, b^0, s_{\text{HB}}^1 s_{\text{free}}^1\rangle$ |
| 5125.5   | 1.0  | $ T^1, b^0, s_{\text{HB}}^2\rangle$   | 6640.7 | 0.0 | $ T^1, b^0, s_{\text{HB}}^1 s_{\text{free}}^1\rangle$ |
| 5169.1   | 0.3  | $ T^1, b^0, s_{\text{HB}}^2\rangle$   | 6822.5 | 0.0 | $ T^0, b^2, s_{\text{free}}^1\rangle$                 |
| 5184.8   | 0.0  | $ T^1, b^0, s_{\text{HB}}^2\rangle$   | 6873.5 | 0.0 | $ T^0, b^2, s_{\text{free}}^1\rangle$                 |
| 5211.2   | 1.3  | $ T^0, b^1, s_{\text{free}}^1\rangle$ | 6920.6 | 0.0 | $ T^0, b^2, s_{\text{free}}^1\rangle$                 |
|          |      |                                       | 6993.0 | 0.3 | $ T^0, b^0, s_{\text{free}}^2\rangle$                 |

| $\omega$ | $I$  | Label                   |        |      |                         |
|----------|------|-------------------------|--------|------|-------------------------|
| 4508.7   | 2.7  | $ T^0, b^1, s^1\rangle$ | 5515.0 | 15.5 | $ T^0, b^0, s^2\rangle$ |
| 4514.7   | 3.0  | $ T^0, b^1, s^1\rangle$ | 5769.9 | 0.2  | $ T^1, b^0, s^2\rangle$ |
| 4536.7   | 3.4  | $ T^0, b^1, s^1\rangle$ | 5770.5 | 0.1  | $ T^1, b^0, s^2\rangle$ |
| 4540.0   | 3.1  | $ T^0, b^1, s^1\rangle$ | 5798.5 | 0.1  | $ T^1, b^0, s^2\rangle$ |
| 4636.9   | 1.2  | $ T^0, b^1, s^1\rangle$ | 5798.8 | 0.1  | $ T^1, b^0, s^2\rangle$ |
| 4640.0   | 1.8  | $ T^0, b^1, s^1\rangle$ | 5809.1 | 0.1  | $ T^1, b^0, s^2\rangle$ |
| 4798.3   | 0.1  | $ T^1, b^1, s^1\rangle$ | 5810.3 | 0.1  | $ T^1, b^0, s^2\rangle$ |
| 4798.3   | 0.0  | $ T^1, b^1, s^1\rangle$ | 5818.8 | 0.0  | $ T^1, b^0, s^2\rangle$ |
| 4804.2   | 0.1  | $ T^1, b^1, s^1\rangle$ | 5842.0 | 0.6  | $ T^0, b^0, s^2\rangle$ |
| 4804.6   | 0.0  | $ T^1, b^1, s^1\rangle$ | 5847.1 | 0.0  | $ T^1, b^0, s^2\rangle$ |
| 4824.7   | 0.0  | $ T^1, b^1, s^1\rangle$ | 5857.9 | 0.0  | $ T^1, b^0, s^2\rangle$ |
| 4828.0   | 0.0  | $ T^1, b^1, s^1\rangle$ | 5858.5 | 0.5  | $ T^0, b^0, s^2\rangle$ |
| 4828.3   | 0.0  | $ T^1, b^1, s^1\rangle$ | 5966.4 | 0.2  | $ T^0, b^0, s^2\rangle$ |
| 4831.1   | 0.0  | $ T^1, b^1, s^1\rangle$ | 6131.8 | 0.0  | $ T^1, b^0, s^2\rangle$ |
| 4848.1   | 0.0  | $ T^1, b^1, s^1\rangle$ | 6134.2 | 0.0  | $ T^1, b^0, s^2\rangle$ |
| 4854.1   | 0.0  | $ T^1, b^1, s^1\rangle$ | 6148.5 | 0.0  | $ T^1, b^0, s^2\rangle$ |
| 4876.1   | 0.0  | $ T^1, b^1, s^1\rangle$ | 6150.5 | 0.0  | $ T^1, b^0, s^2\rangle$ |
| 4879.3   | 0.0  | $ T^1, b^1, s^1\rangle$ | 6150.8 | 0.1  | $ T^0, b^2, s^1\rangle$ |
| 4926.1   | 0.0  | $ T^1, b^1, s^1\rangle$ | 6155.7 | 0.1  | $ T^0, b^2, s^1\rangle$ |
| 4927.4   | 0.0  | $ T^1, b^1, s^1\rangle$ | 6160.5 | 0.0  | $ T^0, b^2, s^1\rangle$ |
| 4928.9   | 0.0  | $ T^1, b^1, s^1\rangle$ | 6160.9 | 0.0  | $ T^0, b^2, s^1\rangle$ |
| 4930.9   | 0.0  | $ T^1, b^1, s^1\rangle$ | 6165.3 | 0.0  | $ T^0, b^2, s^1\rangle$ |
| 4975.9   | 0.0  | $ T^1, b^1, s^1\rangle$ | 6166.4 | 0.0  | $ T^0, b^2, s^1\rangle$ |
| 4979.0   | 0.0  | $ T^1, b^1, s^1\rangle$ | 6183.3 | 0.0  | $ T^1, b^0, s^2\rangle$ |
| 5000.9   | 0.1  | $ T^0, b^3, s^0\rangle$ | 6199.7 | 0.0  | $ T^1, b^0, s^2\rangle$ |
| 5000.9   | 0.1  | $ T^0, b^3, s^0\rangle$ | 6257.4 | 0.0  | $ T^1, b^0, s^2\rangle$ |
| 5024.4   | 0.0  | $ T^0, b^3, s^0\rangle$ | 6257.7 | 0.0  | $ T^1, b^0, s^2\rangle$ |
| 5475.8   | 1.8  | $ T^0, b^0, s^2\rangle$ | 6279.6 | 0.0  | $ T^0, b^2, s^1\rangle$ |
| 5504.2   | 15.1 | $ T^0, b^0, s^2\rangle$ | 6290.9 | 0.0  | $ T^0, b^2, s^1\rangle$ |

## Table S4. Assignment, Projection and Transition Dipole Decomposition of the Pronounced Peaks

Here we listed all of the calculated transitions in the region of  $4000\text{ cm}^{-1}$  -  $7000\text{ cm}^{-1}$  whose IR intensity is larger than  $0.05\text{ km/mol}$ . The *transition energy* ( $\omega$ , in  $\text{cm}^{-1}$ ), the *IR intensity* ( $I$ , in  $\text{km/mol}$ ), and the *components of the transition dipole* ( $\mu_x$ ,  $\mu_y$  and  $\mu_z$ ) are listed in the following tables. In order to make reasonable assignments for these transitions, for each eigenstate  $\psi_a$ , we also listed a few of large components whose contribution ( $|\langle a|T_i, b_j, s_k\rangle|^2$ , or  $|c_{ijk}|^2$ ) are more than 10%.

To analyze the actual source of the transitions, we can decompose the transition dipole moment  $\mu^{g\rightarrow f}$  between ground state  $\langle g|$  and final state  $|f\rangle$  into contribution from its components:

$$\mu^{g\rightarrow f} = \langle g|\hat{\mu}|f\rangle = \sum_{ijk} c_{ijk} \langle g|\hat{\mu}|T_i, b_j, s_k\rangle = \sum_{ijk} \mu^{ijk}$$

in which  $\mu^{ijk}$  represents the contribution of FBR basis function  $|T_i, b_j, s_k\rangle$  to the total transition dipole moment  $\mu^{g\rightarrow f}$ . For each eigenstates, we also listed *the contribution of the FBR components to the total transition moment*, ( $\mu_x^{ijk}$ ,  $\mu_y^{ijk}$  and  $\mu_z^{ijk}$ ), in Debye); we list the first three with largest norm of its transition dipole components (though some of them have small  $|c_{ijk}|^2$ ).

In Figure 4-6, there are some discrepancies between the IR intensity of the bright states *with* and *without* mechanical anharmonicity, and a large portion of them can be explained by analyzing the following table of the transition dipole decomposition. For example, in the calculated spectrum of  $\text{H}_3\text{O}^+ \cdots \text{Ar}_2$ , the small peak located at  $6418\text{ cm}^{-1}$  is assigned as  $|T^1, b^0, s_{\text{HB}}^2\rangle$ , and its intensity mostly comes from  $|T^0, b^0, s_{\text{HB}}^2\rangle$ , which couples to  $|T^1, b^0, s_{\text{HB}}^2\rangle$  by the CB interaction similar to the MIR region. However, although the fundamental OH-stretching  $|T^0, b^0, s_{\text{HB}}^1\rangle$  is  $\approx 3000\text{ cm}^{-1}$  lower, it still has large contribution to the total transition dipole moment; its  $\mu^{ijk}$  is in opposite direction to the contribution from  $|T^0, b^0, s_{\text{HB}}^2\rangle$ , leading to a *destructive interference*. The interference in the transition dipole moment makes the intuitive prediction very difficult, which again highlights the importance of high-quality anharmonic vibrational analysis.

| $\omega$ | $I$ | $\mu_x$ | $\mu_y$ | $\mu_z$ | Assignment                                       | $ c_{ijk}^2 $ | $\mu_x^{ijk}$ | $\mu_y^{ijk}$ | $\mu_z^{ijk}$ |
|----------|-----|---------|---------|---------|--------------------------------------------------|---------------|---------------|---------------|---------------|
| 4701.6   | 1.2 | 0.000   | -0.000  | -0.010  | $\langle 27 T^0, b^1, s_{\text{HB}}^1 \rangle$   | 79.74%        | 0.000         | 0.000         | -0.004        |
|          |     |         |         |         | $\langle 27 T^1, b^1, s_{\text{HB}}^1 \rangle$   | 10.73%        | 0.000         | 0.000         | -0.000        |
|          |     |         |         |         | $\langle 27 T^0, b^0, s_{\text{free}}^1 \rangle$ | 0.03%         | 0.000         | 0.000         | -0.004        |
|          |     |         |         |         | $\langle 27 T^0, b^1, s^0 \rangle$               | 0.06%         | -0.000        | 0.000         | -0.003        |
| 4754.5   | 1.4 | -0.004  | -0.010  | 0.000   | $\langle 28 T^0, b^1, s_{\text{HB}}^1 \rangle$   | 82.24%        | -0.003        | -0.020        | -0.000        |
|          |     |         |         |         | $\langle 28 T^1, b^1, s_{\text{HB}}^1 \rangle$   | 10.37%        | -0.000        | -0.001        | -0.000        |
|          |     |         |         |         | $\langle 28 T^0, b^0, s_{\text{HB}}^1 \rangle$   | 0.07%         | 0.000         | 0.011         | -0.000        |
|          |     |         |         |         | $\langle 28 T^0, b^0, s_{\text{free}}^1 \rangle$ | 0.01%         | -0.001        | -0.002        | -0.000        |
| 4854.6   | 0.2 | -0.001  | -0.004  | 0.000   | $\langle 29 T^0, b^3, s^0 \rangle$               | 85.06%        | 0.002         | 0.005         | -0.000        |
|          |     |         |         |         | $\langle 29 T^0, b^1, s_{\text{free}}^1 \rangle$ | 10.21%        | -0.001        | -0.002        | 0.000         |
|          |     |         |         |         | $\langle 29 T^0, b^1, s^0 \rangle$               | 0.16%         | -0.002        | -0.005        | -0.000        |
|          |     |         |         |         | $\langle 29 T^0, b^0, s_{\text{HB}}^1 \rangle$   | 0.00%         | -0.000        | -0.002        | 0.000         |
| 4913.3   | 0.3 | 0.001   | 0.005   | -0.000  | $\langle 32 T^0, b^3, s^0 \rangle$               | 82.33%        | 0.000         | -0.001        | 0.000         |
|          |     |         |         |         | $\langle 32 T^0, b^1, s_{\text{HB}}^1 \rangle$   | 1.77%         | 0.000         | 0.003         | 0.000         |
|          |     |         |         |         | $\langle 32 T^0, b^1, s_{\text{free}}^1 \rangle$ | 5.11%         | 0.000         | 0.003         | -0.000        |
| 4931.5   | 0.5 | 0.000   | 0.000   | 0.006   | $\langle 33 T^0, b^3, s^0 \rangle$               | 49.08%        | -0.000        | 0.000         | 0.000         |
|          |     |         |         |         | $\langle 33 T^0, b^3, s^0 \rangle$               | 20.92%        | -0.000        | 0.000         | 0.002         |
|          |     |         |         |         | $\langle 33 T^0, b^1, s_{\text{HB}}^1 \rangle$   | 12.35%        | -0.000        | -0.000        | 0.001         |
|          |     |         |         |         | $\langle 33 T^0, b^0, s_{\text{free}}^1 \rangle$ | 0.01%         | -0.000        | -0.000        | 0.002         |
| 4952.9   | 0.3 | -0.001  | -0.004  | -0.000  | $\langle 34 T^1, b^1, s_{\text{HB}}^1 \rangle$   | 60.90%        | 0.000         | 0.003         | 0.000         |
|          |     |         |         |         | $\langle 34 T^0, b^1, s_{\text{HB}}^1 \rangle$   | 14.14%        | -0.001        | -0.008        | -0.000        |
|          |     |         |         |         | $\langle 34 T^2, b^1, s_{\text{HB}}^1 \rangle$   | 11.63%        | 0.000         | 0.001         | 0.000         |
|          |     |         |         |         | $\langle 34 T^0, b^0, s_{\text{HB}}^1 \rangle$   | 0.00%         | 0.000         | 0.003         | -0.000        |
| 5125.8   | 3.3 | -0.005  | -0.015  | 0.000   | $\langle 40 T^0, b^1, s_{\text{free}}^1 \rangle$ | 81.56%        | -0.002        | -0.005        | 0.000         |
|          |     |         |         |         | $\langle 40 T^0, b^3, s^0 \rangle$               | 11.57%        | -0.001        | -0.002        | 0.000         |
|          |     |         |         |         | $\langle 40 T^0, b^1, s^0 \rangle$               | 0.06%         | -0.001        | -0.003        | -0.000        |
|          |     |         |         |         | $\langle 40 T^0, b^0, s_{\text{HB}}^1 \rangle$   | 0.01%         | -0.000        | -0.003        | 0.000         |
| 5131.1   | 0.3 | 0.000   | 0.000   | -0.005  | $\langle 41 T^0, b^1, s_{\text{free}}^1 \rangle$ | 88.97%        | 0.000         | 0.000         | -0.008        |
|          |     |         |         |         | $\langle 41 T^0, b^1, s^0 \rangle$               | 0.01%         | 0.000         | -0.000        | 0.002         |
|          |     |         |         |         | $\langle 41 T^0, b^1, s_{\text{free}}^1 \rangle$ | 1.18%         | 0.000         | 0.000         | 0.001         |
| 5156.3   | 4.0 | -0.000  | -0.000  | -0.018  | $\langle 42 T^0, b^1, s_{\text{free}}^1 \rangle$ | 90.20%        | -0.000        | -0.000        | -0.009        |
|          |     |         |         |         | $\langle 42 T^0, b^0, s_{\text{free}}^1 \rangle$ | 0.06%         | 0.000         | 0.000         | -0.006        |
|          |     |         |         |         | $\langle 42 T^0, b^1, s_{\text{free}}^1 \rangle$ | 2.89%         | 0.000         | 0.000         | -0.001        |
| 5187.7   | 2.7 | 0.002   | 0.014   | -0.000  | $\langle 44 T^0, b^1, s_{\text{free}}^1 \rangle$ | 85.65%        | 0.001         | 0.012         | -0.000        |
|          |     |         |         |         | $\langle 44 T^0, b^0, s_{\text{HB}}^1 \rangle$   | 0.01%         | 0.000         | 0.004         | -0.000        |
|          |     |         |         |         | $\langle 44 T^0, b^1, s_{\text{free}}^1 \rangle$ | 4.84%         | -0.000        | -0.001        | 0.000         |
| 6089.9   | 2.4 | -0.002  | -0.012  | 0.000   | $\langle 57 T^0, b^0, s_{\text{HB}}^2 \rangle$   | 72.66%        | -0.002        | -0.010        | 0.000         |
|          |     |         |         |         | $\langle 57 T^1, b^0, s_{\text{HB}}^2 \rangle$   | 19.90%        | -0.000        | 0.002         | -0.000        |
|          |     |         |         |         | $\langle 57 T^1, b^0, s^0 \rangle$               | 0.00%         | -0.000        | -0.003        | 0.000         |
| 6271.0   | 0.2 | 0.001   | 0.004   | 0.000   | $\langle 58 T^0, b^2, s_{\text{HB}}^1 \rangle$   | 44.77%        | -0.000        | -0.002        | 0.000         |

|        |     |        |        |        |                                                                 |        |        |        |        |
|--------|-----|--------|--------|--------|-----------------------------------------------------------------|--------|--------|--------|--------|
|        |     |        |        |        | $\langle 58 T^0, b^2, s_{\text{HB}}^1\rangle$                   | 29.95% | -0.001 | -0.006 | 0.000  |
|        |     |        |        |        | $\langle 58 T^0, b^0, s_{\text{HB}}^1\rangle$                   | 0.07%  | 0.000  | 0.011  | -0.000 |
| 6333.7 | 0.3 | -0.001 | -0.004 | 0.000  | $\langle 60 T^1, b^0, s_{\text{HB}}^2\rangle$                   | 48.10% | 0.000  | -0.003 | 0.000  |
|        |     |        |        |        | $\langle 60 T^0, b^0, s_{\text{HB}}^2\rangle$                   | 22.69% | -0.001 | -0.006 | 0.000  |
|        |     |        |        |        | $\langle 60 T^2, b^0, s_{\text{HB}}^2\rangle$                   | 19.24% | -0.000 | -0.001 | -0.000 |
|        |     |        |        |        | $\langle 60 T^0, b^0, s_{\text{HB}}^1\rangle$                   | 0.01%  | 0.000  | 0.003  | -0.000 |
| 6634.2 | 0.1 | -0.003 | -0.000 | -0.000 | $\langle 72 T^0, b^0, s_{\text{HB}}^1 s_{\text{free}}^1\rangle$ | 78.93% | -0.003 | 0.004  | -0.000 |
|        |     |        |        |        | $\langle 72 T^0, b^0, s_{\text{HB}}^1\rangle$                   | 0.01%  | -0.000 | -0.004 | 0.000  |
|        |     |        |        |        | $\langle 72 T^0, b^0, s_{\text{free}}^1\rangle$                 | 0.01%  | 0.001  | 0.002  | 0.000  |
| 6685.4 | 0.2 | 0.000  | 0.000  | -0.004 | $\langle 75 T^0, b^0, s_{\text{HB}}^1 s_{\text{free}}^1\rangle$ | 79.33% | 0.000  | -0.000 | -0.006 |
|        |     |        |        |        | $\langle 75 T^0, b^0, s_{\text{free}}^1\rangle$                 | 0.01%  | -0.000 | -0.000 | 0.002  |
|        |     |        |        |        | $\langle 75 T^0, b^1, s^0\rangle$                               | 0.00%  | 0.000  | -0.000 | 0.001  |
| 6726.1 | 0.2 | -0.001 | -0.003 | -0.000 | $\langle 78 T^0, b^2, s_{\text{free}}^1\rangle$                 | 54.44% | -0.002 | -0.004 | -0.000 |
|        |     |        |        |        | $\langle 78 T^0, b^4, s^0\rangle$                               | 17.44% | 0.000  | 0.000  | 0.000  |
|        |     |        |        |        | $\langle 78 T^0, b^0, s_{\text{free}}^2\rangle$                 | 10.99% | -0.002 | -0.004 | 0.000  |
|        |     |        |        |        | $\langle 78 T^0, b^0, s_{\text{free}}^1\rangle$                 | 0.07%  | 0.003  | 0.004  | 0.000  |
| 6735.4 | 0.3 | 0.000  | 0.000  | -0.004 | $\langle 79 T^0, b^2, s_{\text{free}}^1\rangle$                 | 44.44% | 0.000  | 0.000  | -0.004 |
|        |     |        |        |        | $\langle 79 T^0, b^2, s_{\text{free}}^1\rangle$                 | 16.22% | -0.000 | -0.000 | -0.000 |
|        |     |        |        |        | $\langle 79 T^0, b^4, s^0\rangle$                               | 16.03% | 0.000  | 0.000  | 0.000  |
|        |     |        |        |        | $\langle 79 T^0, b^0, s_{\text{free}}^2\rangle$                 | 10.70% | -0.000 | -0.000 | -0.006 |
|        |     |        |        |        | $\langle 79 T^0, b^0, s_{\text{free}}^1\rangle$                 | 0.07%  | -0.000 | -0.000 | 0.006  |
| 6821.5 | 0.1 | -0.000 | 0.000  | 0.002  | $\langle 88 T^0, b^2, s_{\text{free}}^1\rangle$                 | 60.03% | 0.000  | 0.000  | -0.001 |
|        |     |        |        |        | $\langle 88 T^0, b^2, s_{\text{free}}^1\rangle$                 | 14.31% | 0.000  | 0.000  | -0.002 |
|        |     |        |        |        | $\langle 88 T^0, b^0, s_{\text{free}}^1\rangle$                 | 0.01%  | -0.000 | -0.000 | 0.002  |
|        |     |        |        |        | $\langle 88 T^0, b^0, s_{\text{HB}}^1 s_{\text{free}}^1\rangle$ | 4.48%  | -0.000 | 0.000  | 0.001  |
| 6873.3 | 0.1 | 0.000  | 0.000  | 0.003  | $\langle 91 T^1, b^0, s_{\text{HB}}^1 s_{\text{free}}^1\rangle$ | 56.85% | 0.000  | 0.000  | -0.000 |
|        |     |        |        |        | $\langle 91 T^0, b^0, s_{\text{HB}}^1 s_{\text{free}}^1\rangle$ | 10.12% | -0.000 | 0.000  | 0.002  |
|        |     |        |        |        | $\langle 91 T^0, b^0, s_{\text{free}}^2\rangle$                 | 1.74%  | 0.000  | 0.000  | 0.002  |
|        |     |        |        |        | $\langle 91 T^0, b^0, s_{\text{free}}^1\rangle$                 | 0.00%  | 0.000  | 0.000  | -0.001 |
| 6899.0 | 1.8 | -0.004 | -0.009 | -0.000 | $\langle 93 T^0, b^0, s_{\text{free}}^2\rangle$                 | 83.12% | -0.005 | -0.012 | 0.000  |
|        |     |        |        |        | $\langle 93 T^0, b^2, s_{\text{free}}^1\rangle$                 | 6.78%  | 0.001  | 0.002  | 0.000  |
|        |     |        |        |        | $\langle 93 T^0, b^0, s_{\text{free}}^1\rangle$                 | 0.00%  | 0.001  | 0.001  | 0.000  |
| 6912.6 | 3.3 | 0.000  | 0.000  | -0.014 | $\langle 96 T^0, b^0, s_{\text{free}}^2\rangle$                 | 80.59% | -0.000 | -0.000 | -0.016 |
|        |     |        |        |        | $\langle 96 T^0, b^2, s_{\text{free}}^1\rangle$                 | 3.30%  | -0.000 | -0.000 | 0.001  |
|        |     |        |        |        | $\langle 96 T^0, b^0, s_{\text{free}}^1\rangle$                 | 0.00%  | -0.000 | -0.000 | 0.001  |
| 6915.4 | 0.1 | -0.000 | -0.000 | 0.003  | $\langle 97 T^1, b^2, s_{\text{free}}^1\rangle$                 | 56.91% | -0.000 | -0.000 | -0.000 |
|        |     |        |        |        | $\langle 97 T^1, b^2, s_{\text{free}}^1\rangle$                 | 19.38% | -0.000 | 0.000  | 0.000  |
|        |     |        |        |        | $\langle 97 T^0, b^0, s_{\text{free}}^2\rangle$                 | 3.97%  | 0.000  | 0.000  | 0.003  |
|        |     |        |        |        | $\langle 97 T^0, b^2, s_{\text{free}}^1\rangle$                 | 0.55%  | 0.000  | 0.000  | -0.000 |

| $\omega$ | $I$ | $\mu_x$ | $\mu_y$ | $\mu_z$ | Assignment                                      | $ c_{ijk}^2 $ | $\mu_x^{ijk}$ | $\mu_y^{ijk}$ | $\mu_z^{ijk}$ |
|----------|-----|---------|---------|---------|-------------------------------------------------|---------------|---------------|---------------|---------------|
| 4765.8   | 1.0 | -0.000  | 0.000   | 0.009   | $\langle 54 T^0, b^1, s_{\text{HB}}^1\rangle$   | 59.26%        | 0.000         | -0.000        | 0.015         |
|          |     |         |         |         | $\langle 54 T^0, b^1, s_{\text{HB}}^1\rangle$   | 14.53%        | -0.000        | 0.000         | -0.006        |
|          |     |         |         |         | $\langle 54 T^0, b^1, s^0\rangle$               | 0.06%         | -0.000        | -0.000        | 0.003         |
| 4775.3   | 1.9 | -0.006  | 0.011   | -0.000  | $\langle 55 T^0, b^1, s_{\text{HB}}^1\rangle$   | 35.04%        | -0.003        | 0.007         | -0.000        |
|          |     |         |         |         | $\langle 55 T^0, b^1, s_{\text{HB}}^1\rangle$   | 34.64%        | 0.000         | -0.002        | 0.000         |
|          |     |         |         |         | $\langle 55 T^0, b^3, s^0\rangle$               | 20.34%        | 0.001         | -0.002        | 0.000         |
|          |     |         |         |         | $\langle 55 T^0, b^0, s_{\text{free}}^1\rangle$ | 0.04%         | -0.002        | 0.003         | -0.000        |
|          |     |         |         |         | $\langle 55 T^0, b^1, s^0\rangle$               | 0.14%         | -0.002        | 0.003         | 0.000         |
| 4816.9   | 0.2 | 0.003   | -0.003  | -0.000  | $\langle 56 T^0, b^1, s_{\text{HB}}^1\rangle$   | 36.29%        | 0.003         | -0.007        | 0.000         |
|          |     |         |         |         | $\langle 56 T^0, b^1, s_{\text{HB}}^1\rangle$   | 32.72%        | 0.000         | -0.002        | 0.000         |
|          |     |         |         |         | $\langle 56 T^0, b^3, s^0\rangle$               | 20.67%        | -0.000        | -0.001        | 0.000         |
|          |     |         |         |         | $\langle 56 T^0, b^0, s_{\text{HB}}^1\rangle$   | 0.06%         | -0.000        | 0.006         | 0.000         |
| 4845.1   | 2.1 | -0.000  | 0.000   | -0.013  | $\langle 57 T^0, b^1, s_{\text{HB}}^1\rangle$   | 56.10%        | -0.000        | 0.000         | -0.012        |
|          |     |         |         |         | $\langle 57 T^0, b^1, s_{\text{HB}}^1\rangle$   | 18.84%        | -0.000        | 0.000         | -0.008        |
|          |     |         |         |         | $\langle 57 T^0, b^3, s^0\rangle$               | 13.87%        | 0.000         | 0.000         | -0.002        |
|          |     |         |         |         | $\langle 57 T^0, b^0, s_{\text{HB}}^1\rangle$   | 0.02%         | 0.000         | 0.000         | 0.007         |
| 4876.7   | 0.8 | 0.000   | -0.000  | 0.008   | $\langle 58 T^0, b^3, s^0\rangle$               | 61.58%        | 0.000         | 0.000         | -0.004        |
|          |     |         |         |         | $\langle 58 T^0, b^1, s_{\text{HB}}^1\rangle$   | 13.30%        | 0.000         | -0.000        | 0.006         |
|          |     |         |         |         | $\langle 58 T^0, b^1, s^0\rangle$               | 0.07%         | -0.000        | -0.000        | 0.003         |
| 4914.5   | 0.5 | 0.003   | -0.006  | -0.000  | $\langle 60 T^0, b^3, s^0\rangle$               | 42.47%        | 0.002         | -0.003        | 0.000         |
|          |     |         |         |         | $\langle 60 T^1, b^1, s_{\text{HB}}^1\rangle$   | 21.51%        | 0.000         | 0.000         | -0.000        |
|          |     |         |         |         | $\langle 60 T^0, b^1, s_{\text{HB}}^1\rangle$   | 4.03%         | 0.001         | -0.002        | 0.000         |
|          |     |         |         |         | $\langle 60 T^0, b^1, s^0\rangle$               | 0.01%         | -0.001        | 0.001         | 0.000         |
| 4918.6   | 0.1 | -0.001  | 0.003   | 0.000   | $\langle 61 T^1, b^1, s_{\text{HB}}^1\rangle$   | 30.16%        | -0.000        | 0.001         | 0.000         |
|          |     |         |         |         | $\langle 61 T^1, b^1, s_{\text{HB}}^1\rangle$   | 27.48%        | 0.000         | -0.001        | 0.000         |
|          |     |         |         |         | $\langle 61 T^0, b^3, s^0\rangle$               | 17.94%        | -0.001        | 0.002         | -0.000        |
|          |     |         |         |         | $\langle 61 T^1, b^3, s^0\rangle$               | 11.89%        | 0.000         | 0.000         | 0.000         |
|          |     |         |         |         | $\langle 61 T^0, b^1, s^0\rangle$               | 0.01%         | 0.001         | -0.001        | -0.000        |
| 4936.8   | 0.2 | 0.000   | -0.000  | 0.004   | $\langle 62 T^0, b^3, s^0\rangle$               | 52.46%        | -0.000        | -0.000        | 0.000         |
|          |     |         |         |         | $\langle 62 T^1, b^1, s_{\text{HB}}^1\rangle$   | 15.08%        | 0.000         | 0.000         | 0.000         |
|          |     |         |         |         | $\langle 62 T^1, b^1, s_{\text{HB}}^1\rangle$   | 11.89%        | 0.000         | 0.000         | 0.000         |
|          |     |         |         |         | $\langle 62 T^0, b^1, s_{\text{HB}}^1\rangle$   | 2.69%         | 0.000         | -0.000        | 0.003         |
|          |     |         |         |         | $\langle 62 T^0, b^1, s_{\text{HB}}^1\rangle$   | 0.49%         | -0.000        | 0.000         | -0.001        |
|          |     |         |         |         | $\langle 62 T^0, b^3, s^0\rangle$               | 3.71%         | -0.000        | -0.000        | 0.001         |
| 4946.8   | 0.5 | -0.003  | 0.005   | 0.000   | $\langle 63 T^0, b^3, s^0\rangle$               | 61.01%        | -0.000        | -0.001        | 0.000         |
|          |     |         |         |         | $\langle 63 T^0, b^1, s_{\text{HB}}^1\rangle$   | 13.83%        | -0.002        | 0.004         | -0.000        |
|          |     |         |         |         | $\langle 63 T^0, b^1, s_{\text{free}}^1\rangle$ | 2.29%         | -0.001        | 0.001         | 0.000         |
|          |     |         |         |         | $\langle 63 T^0, b^0, s_{\text{free}}^1\rangle$ | 0.00%         | -0.001        | 0.001         | -0.000        |
| 4960.4   | 0.2 | -0.002  | 0.003   | 0.000   | $\langle 64 T^1, b^1, s_{\text{HB}}^1\rangle$   | 27.17%        | 0.000         | -0.001        | -0.000        |
|          |     |         |         |         | $\langle 64 T^1, b^1, s_{\text{HB}}^1\rangle$   | 19.56%        | 0.000         | -0.001        | 0.000         |



|        |     |        |        |        |                                                 |        |        |        |        |
|--------|-----|--------|--------|--------|-------------------------------------------------|--------|--------|--------|--------|
|        |     |        |        |        | $\langle 64 T^1, b^3, s^0\rangle$               | 12.50% | 0.000  | 0.000  | 0.000  |
|        |     |        |        |        | $\langle 64 T^1, b^1, s_{\text{HB}}^1\rangle$   | 12.26% | 0.000  | 0.000  | -0.000 |
|        |     |        |        |        | $\langle 64 T^0, b^1, s_{\text{HB}}^1\rangle$   | 2.79%  | -0.001 | 0.002  | -0.000 |
|        |     |        |        |        | $\langle 64 T^0, b^3, s^0\rangle$               | 6.08%  | -0.001 | 0.001  | -0.000 |
|        |     |        |        |        | $\langle 64 T^0, b^0, s_{\text{free}}^1\rangle$ | 0.00%  | -0.001 | 0.001  | -0.000 |
| 4964.0 | 0.2 | -0.002 | 0.004  | 0.000  | $\langle 65 T^0, b^1, s_{\text{HB}}^1\rangle$   | 16.18% | 0.000  | -0.001 | 0.000  |
|        |     |        |        |        | $\langle 65 T^1, b^1, s_{\text{HB}}^1\rangle$   | 15.99% | -0.000 | -0.000 | -0.000 |
|        |     |        |        |        | $\langle 65 T^1, b^1, s_{\text{HB}}^1\rangle$   | 11.87% | 0.000  | 0.000  | -0.000 |
|        |     |        |        |        | $\langle 65 T^0, b^0, s_{\text{HB}}^1\rangle$   | 0.01%  | -0.000 | 0.002  | 0.000  |
|        |     |        |        |        | $\langle 65 T^0, b^3, s^0\rangle$               | 6.24%  | -0.001 | 0.001  | -0.000 |
| 4967.8 | 0.1 | 0.000  | -0.000 | 0.003  | $\langle 66 T^0, b^3, s^0\rangle$               | 19.63% | -0.000 | -0.000 | 0.000  |
|        |     |        |        |        | $\langle 66 T^1, b^3, s^0\rangle$               | 16.76% | 0.000  | 0.000  | 0.000  |
|        |     |        |        |        | $\langle 66 T^1, b^1, s_{\text{HB}}^1\rangle$   | 16.32% | 0.000  | 0.000  | 0.000  |
|        |     |        |        |        | $\langle 66 T^1, b^1, s_{\text{HB}}^1\rangle$   | 15.63% | 0.000  | 0.000  | 0.000  |
|        |     |        |        |        | $\langle 66 T^0, b^1, s_{\text{HB}}^1\rangle$   | 8.67%  | 0.000  | -0.000 | 0.006  |
|        |     |        |        |        | $\langle 66 T^0, b^1, s_{\text{HB}}^1\rangle$   | 7.21%  | -0.000 | 0.000  | -0.004 |
|        |     |        |        |        | $\langle 66 T^0, b^3, s^0\rangle$               | 3.41%  | -0.000 | -0.000 | 0.001  |
| 5003.4 | 0.2 | 0.000  | -0.000 | 0.004  | $\langle 68 T^1, b^3, s^0\rangle$               | 24.06% | 0.000  | 0.000  | -0.000 |
|        |     |        |        |        | $\langle 68 T^1, b^1, s_{\text{HB}}^1\rangle$   | 15.71% | 0.000  | 0.000  | 0.000  |
|        |     |        |        |        | $\langle 68 T^1, b^1, s_{\text{HB}}^1\rangle$   | 14.02% | 0.000  | 0.000  | 0.000  |
|        |     |        |        |        | $\langle 68 T^1, b^3, s^0\rangle$               | 13.12% | 0.000  | 0.000  | 0.000  |
|        |     |        |        |        | $\langle 68 T^0, b^1, s_{\text{HB}}^1\rangle$   | 3.20%  | 0.000  | -0.000 | 0.004  |
|        |     |        |        |        | $\langle 68 T^0, b^1, s_{\text{HB}}^1\rangle$   | 2.79%  | 0.000  | -0.000 | 0.003  |
|        |     |        |        |        | $\langle 68 T^1, b^1, s_{\text{HB}}^1\rangle$   | 5.03%  | 0.000  | 0.000  | -0.001 |
| 5021.4 | 0.1 | 0.000  | -0.000 | 0.002  | $\langle 69 T^1, b^3, s^0\rangle$               | 36.41% | -0.000 | -0.000 | 0.000  |
|        |     |        |        |        | $\langle 69 T^1, b^1, s_{\text{HB}}^1\rangle$   | 25.28% | 0.000  | -0.000 | -0.001 |
|        |     |        |        |        | $\langle 69 T^0, b^1, s_{\text{HB}}^1\rangle$   | 3.37%  | 0.000  | -0.000 | 0.003  |
|        |     |        |        |        | $\langle 69 T^0, b^1, s_{\text{HB}}^1\rangle$   | 0.57%  | 0.000  | -0.000 | 0.001  |
| 5155.0 | 2.9 | 0.000  | -0.000 | 0.015  | $\langle 86 T^0, b^1, s_{\text{free}}^1\rangle$ | 69.02% | 0.000  | -0.000 | 0.007  |
|        |     |        |        |        | $\langle 86 T^0, b^0, s_{\text{HB}}^1\rangle$   | 0.01%  | 0.000  | 0.000  | 0.005  |
|        |     |        |        |        | $\langle 86 T^0, b^1, s^0\rangle$               | 0.03%  | -0.000 | -0.000 | 0.002  |
| 5156.1 | 0.7 | 0.000  | -0.000 | -0.008 | $\langle 87 T^0, b^1, s_{\text{free}}^1\rangle$ | 19.56% | -0.000 | 0.000  | -0.004 |
|        |     |        |        |        | $\langle 87 T^2, b^3, s^0\rangle$               | 19.34% | 0.000  | 0.000  | 0.000  |
|        |     |        |        |        | $\langle 87 T^0, b^0, s_{\text{HB}}^1\rangle$   | 0.00%  | -0.000 | -0.000 | -0.003 |
|        |     |        |        |        | $\langle 87 T^1, b^0, s^0\rangle$               | 0.00%  | -0.000 | -0.000 | -0.001 |
| 5181.7 | 1.2 | -0.003 | 0.009  | 0.000  | $\langle 89 T^0, b^1, s_{\text{free}}^1\rangle$ | 55.83% | -0.002 | 0.007  | 0.000  |
|        |     |        |        |        | $\langle 89 T^2, b^3, s^0\rangle$               | 12.77% | 0.000  | 0.000  | 0.000  |
|        |     |        |        |        | $\langle 89 T^0, b^0, s_{\text{free}}^1\rangle$ | 0.01%  | -0.001 | 0.002  | -0.000 |
|        |     |        |        |        | $\langle 89 T^0, b^0, s_{\text{HB}}^1\rangle$   | 0.00%  | -0.000 | 0.001  | 0.000  |
| 5183.6 | 0.8 | 0.003  | -0.007 | 0.000  | $\langle 90 T^0, b^1, s_{\text{free}}^1\rangle$ | 37.43% | 0.002  | -0.006 | -0.000 |
|        |     |        |        |        | $\langle 90 T^2, b^3, s^0\rangle$               | 17.13% | 0.000  | 0.000  | 0.000  |
|        |     |        |        |        | $\langle 90 T^0, b^0, s_{\text{free}}^1\rangle$ | 0.01%  | 0.001  | -0.002 | 0.000  |
|        |     |        |        |        | $\langle 90 T^0, b^0, s_{\text{HB}}^1\rangle$   | 0.00%  | 0.000  | -0.001 | -0.000 |
| 6183.0 | 0.6 | 0.003  | -0.006 | 0.000  | $\langle 114 T^0, b^0, s_{\text{HB}}^2\rangle$  | 72.48% | 0.003  | -0.005 | 0.000  |
|        |     |        |        |        | $\langle 114 T^1, b^0, s_{\text{HB}}^2\rangle$  | 12.12% | -0.000 | 0.001  | -0.000 |

|        |     |        |        |        |                                                                  |        |        |        |        |
|--------|-----|--------|--------|--------|------------------------------------------------------------------|--------|--------|--------|--------|
|        |     |        |        |        | $\langle 114 T^0, b^0, s^0\rangle$                               | 0.01%  | -0.000 | -0.002 | -0.000 |
|        |     |        |        |        | $\langle 114 T^1, b^0, s^0\rangle$                               | 0.00%  | 0.000  | -0.001 | 0.000  |
| 6185.2 | 3.1 | -0.000 | 0.000  | 0.014  | $\langle 115 T^0, b^0, s_{\text{HB}}^2\rangle$                   | 72.26% | 0.000  | -0.000 | 0.015  |
|        |     |        |        |        | $\langle 115 T^1, b^0, s_{\text{HB}}^2\rangle$                   | 12.71% | -0.000 | 0.000  | -0.003 |
|        |     |        |        |        | $\langle 115 T^0, b^0, s_{\text{HB}}^1\rangle$                   | 0.01%  | -0.000 | -0.000 | -0.004 |
|        |     |        |        |        | $\langle 115 T^1, b^0, s^0\rangle$                               | 0.01%  | 0.000  | 0.000  | 0.003  |
| 6342.8 | 0.3 | -0.000 | 0.000  | -0.004 | $\langle 118 T^0, b^2, s_{\text{HB}}^1\rangle$                   | 30.11% | 0.000  | 0.000  | 0.007  |
|        |     |        |        |        | $\langle 118 T^1, b^0, s_{\text{HB}}^2\rangle$                   | 23.11% | -0.000 | -0.000 | -0.001 |
|        |     |        |        |        | $\langle 118 T^0, b^2, s_{\text{HB}}^1\rangle$                   | 12.79% | 0.000  | 0.000  | 0.000  |
|        |     |        |        |        | $\langle 118 T^0, b^4, s^0\rangle$                               | 10.72% | 0.000  | 0.000  | 0.000  |
|        |     |        |        |        | $\langle 118 T^0, b^0, s_{\text{HB}}^1\rangle$                   | 0.05%  | -0.000 | -0.000 | -0.011 |
|        |     |        |        |        | $\langle 118 T^0, b^0, s_{\text{HB}}^2\rangle$                   | 0.69%  | -0.000 | 0.000  | -0.001 |
| 6349.4 | 0.1 | -0.001 | 0.002  | 0.000  | $\langle 119 T^0, b^2, s_{\text{HB}}^1\rangle$                   | 34.36% | 0.000  | 0.000  | 0.000  |
|        |     |        |        |        | $\langle 119 T^0, b^2, s_{\text{HB}}^1\rangle$                   | 26.45% | 0.000  | -0.003 | -0.000 |
|        |     |        |        |        | $\langle 119 T^0, b^0, s_{\text{HB}}^1\rangle$                   | 0.04%  | -0.000 | 0.005  | 0.000  |
|        |     |        |        |        | $\langle 119 T^1, b^0, s_{\text{HB}}^2\rangle$                   | 6.27%  | -0.000 | -0.001 | 0.000  |
| 6417.7 | 0.6 | -0.000 | 0.000  | -0.006 | $\langle 122 T^1, b^0, s_{\text{HB}}^2\rangle$                   | 35.50% | -0.000 | 0.000  | -0.004 |
|        |     |        |        |        | $\langle 122 T^0, b^0, s_{\text{HB}}^2\rangle$                   | 21.81% | -0.000 | 0.000  | -0.008 |
|        |     |        |        |        | $\langle 122 T^1, b^0, s_{\text{HB}}^2\rangle$                   | 10.28% | 0.000  | 0.000  | 0.000  |
|        |     |        |        |        | $\langle 122 T^0, b^0, s_{\text{HB}}^1\rangle$                   | 0.01%  | 0.000  | 0.000  | 0.005  |
| 6418.0 | 0.1 | -0.001 | 0.002  | 0.000  | $\langle 123 T^1, b^0, s_{\text{HB}}^2\rangle$                   | 35.13% | -0.000 | 0.001  | -0.000 |
|        |     |        |        |        | $\langle 123 T^0, b^0, s_{\text{HB}}^2\rangle$                   | 20.65% | -0.001 | 0.003  | -0.000 |
|        |     |        |        |        | $\langle 123 T^1, b^0, s_{\text{HB}}^2\rangle$                   | 10.61% | 0.000  | 0.001  | -0.000 |
|        |     |        |        |        | $\langle 123 T^0, b^0, s_{\text{HB}}^1\rangle$                   | 0.01%  | 0.000  | -0.002 | -0.000 |
| 6504.8 | 0.1 | -0.001 | -0.002 | 0.000  | $\langle 129 T^0, b^0, s_{\text{HB}}^2\rangle$                   | 25.05% | -0.000 | -0.004 | -0.000 |
|        |     |        |        |        | $\langle 129 T^2, b^0, s_{\text{HB}}^2\rangle$                   | 16.44% | 0.000  | -0.001 | 0.000  |
|        |     |        |        |        | $\langle 129 T^2, b^0, s_{\text{HB}}^2\rangle$                   | 15.68% | -0.000 | 0.001  | -0.000 |
|        |     |        |        |        | $\langle 129 T^0, b^2, s_{\text{HB}}^1\rangle$                   | 8.63%  | -0.000 | 0.002  | 0.000  |
| 6514.1 | 0.1 | -0.000 | -0.002 | -0.000 | $\langle 131 T^2, b^0, s_{\text{HB}}^2\rangle$                   | 27.85% | -0.000 | 0.001  | -0.000 |
|        |     |        |        |        | $\langle 131 T^0, b^0, s_{\text{HB}}^2\rangle$                   | 22.97% | -0.000 | -0.003 | -0.000 |
|        |     |        |        |        | $\langle 131 T^2, b^0, s_{\text{HB}}^2\rangle$                   | 14.67% | 0.000  | -0.001 | 0.000  |
|        |     |        |        |        | $\langle 131 T^0, b^0, s_{\text{HB}}^1\rangle$                   | 0.00%  | -0.000 | 0.001  | 0.000  |
| 6734.5 | 0.4 | 0.004  | -0.003 | 0.000  | $\langle 167 T^0, b^2, s_{\text{free}}^1\rangle$                 | 43.62% | 0.002  | -0.004 | 0.000  |
|        |     |        |        |        | $\langle 167 T^0, b^0, s_{\text{HB}}^1 s_{\text{free}}^1\rangle$ | 41.27% | 0.004  | -0.003 | -0.000 |
|        |     |        |        |        | $\langle 167 T^0, b^0, s_{\text{free}}^1\rangle$                 | 0.09%  | -0.004 | 0.005  | -0.000 |
| 6827.3 | 0.2 | -0.003 | 0.002  | -0.000 | $\langle 185 T^0, b^2, s_{\text{free}}^1\rangle$                 | 43.80% | 0.000  | -0.000 | 0.000  |
|        |     |        |        |        | $\langle 185 T^0, b^0, s_{\text{HB}}^1 s_{\text{free}}^1\rangle$ | 21.58% | -0.003 | 0.002  | 0.000  |
|        |     |        |        |        | $\langle 185 T^0, b^2, s_{\text{free}}^1\rangle$                 | 19.46% | 0.001  | -0.003 | 0.000  |
|        |     |        |        |        | $\langle 185 T^0, b^0, s_{\text{free}}^1\rangle$                 | 0.01%  | -0.001 | 0.001  | -0.000 |
| 6911.9 | 0.1 | -0.001 | 0.001  | -0.000 | $\langle 200 T^1, b^2, s_{\text{free}}^1\rangle$                 | 27.96% | 0.000  | 0.001  | 0.000  |
|        |     |        |        |        | $\langle 200 T^1, b^0, s_{\text{HB}}^1 s_{\text{free}}^1\rangle$ | 15.87% | -0.000 | 0.000  | 0.000  |
|        |     |        |        |        | $\langle 200 T^1, b^2, s_{\text{free}}^1\rangle$                 | 14.62% | 0.000  | 0.000  | 0.000  |
|        |     |        |        |        | $\langle 200 T^1, b^0, s_{\text{HB}}^1 s_{\text{free}}^1\rangle$ | 13.85% | 0.000  | -0.000 | -0.000 |
|        |     |        |        |        | $\langle 200 T^0, b^0, s_{\text{HB}}^1 s_{\text{free}}^1\rangle$ | 4.58%  | -0.001 | 0.001  | 0.000  |
|        |     |        |        |        | $\langle 200 T^1, b^0, s^0\rangle$                               | 0.00%  | 0.000  | -0.001 | 0.000  |

|        |     |        |        |        |                                                                  |        |        |        |        |
|--------|-----|--------|--------|--------|------------------------------------------------------------------|--------|--------|--------|--------|
|        |     |        |        |        | $\langle 200 T^0, b^0, s_{\text{free}}^2\rangle$                 | 0.34%  | -0.000 | 0.001  | -0.000 |
| 6965.0 | 1.2 | 0.004  | -0.007 | -0.000 | $\langle 208 T^0, b^0, s_{\text{free}}^2\rangle$                 | 41.20% | 0.005  | -0.008 | 0.000  |
|        |     |        |        |        | $\langle 208 T^1, b^2, s_{\text{free}}^1\rangle$                 | 22.61% | 0.000  | 0.001  | 0.000  |
|        |     |        |        |        | $\langle 208 T^1, b^0, s_{\text{HB}}^1 s_{\text{free}}^1\rangle$ | 12.49% | -0.000 | 0.000  | 0.000  |
|        |     |        |        |        | $\langle 208 T^1, b^2, s_{\text{free}}^1\rangle$                 | 10.54% | 0.000  | -0.001 | 0.000  |
|        |     |        |        |        | $\langle 208 T^0, b^2, s_{\text{free}}^1\rangle$                 | 2.70%  | -0.001 | 0.001  | -0.000 |
|        |     |        |        |        | $\langle 208 T^0, b^0, s_{\text{HB}}^1 s_{\text{free}}^1\rangle$ | 1.32%  | 0.001  | -0.001 | -0.000 |
| 6970.0 | 0.1 | 0.001  | -0.002 | -0.000 | $\langle 210 T^2, b^4, s^0\rangle$                               | 35.69% | 0.000  | 0.000  | 0.000  |
|        |     |        |        |        | $\langle 210 T^2, b^2, s_{\text{HB}}^1\rangle$                   | 15.80% | 0.000  | 0.000  | 0.000  |
|        |     |        |        |        | $\langle 210 T^2, b^4, s^0\rangle$                               | 11.86% | 0.000  | 0.000  | 0.000  |
|        |     |        |        |        | $\langle 210 T^0, b^0, s_{\text{free}}^2\rangle$                 | 3.29%  | 0.001  | -0.002 | 0.000  |
|        |     |        |        |        | $\langle 210 T^0, b^0, s_{\text{free}}^1\rangle$                 | 0.00%  | -0.000 | 0.000  | -0.000 |
|        |     |        |        |        | $\langle 210 T^1, b^2, s_{\text{free}}^1\rangle$                 | 1.05%  | -0.000 | 0.000  | -0.000 |
| 6972.9 | 1.1 | -0.004 | 0.007  | 0.000  | $\langle 211 T^0, b^0, s_{\text{free}}^2\rangle$                 | 39.00% | -0.004 | 0.008  | -0.000 |
|        |     |        |        |        | $\langle 211 T^1, b^2, s_{\text{free}}^1\rangle$                 | 12.96% | 0.000  | 0.000  | 0.000  |
|        |     |        |        |        | $\langle 211 T^1, b^0, s_{\text{HB}}^1 s_{\text{free}}^1\rangle$ | 10.63% | -0.000 | 0.000  | 0.000  |
|        |     |        |        |        | $\langle 211 T^0, b^0, s_{\text{free}}^1\rangle$                 | 0.00%  | 0.000  | -0.001 | 0.000  |
|        |     |        |        |        | $\langle 211 T^1, b^2, s_{\text{free}}^1\rangle$                 | 6.83%  | 0.000  | -0.001 | 0.000  |

| $\omega$ | $I$ | $\mu_x$ | $\mu_y$ | $\mu_z$ | Assignment                        | $ c_{ijk}^2 $ | $\mu_x^{ijk}$ | $\mu_y^{ijk}$ | $\mu_z^{ijk}$ |
|----------|-----|---------|---------|---------|-----------------------------------|---------------|---------------|---------------|---------------|
| 4813.6   | 0.7 | -0.006  | -0.004  | 0.000   | $\langle 90 T^0, b^1, s^1\rangle$ | 32.26%        | -0.008        | -0.002        | 0.000         |
|          |     |         |         |         | $\langle 90 T^0, b^3, s^0\rangle$ | 15.02%        | 0.002         | 0.000         | 0.000         |
|          |     |         |         |         | $\langle 90 T^0, b^1, s^1\rangle$ | 12.79%        | 0.004         | -0.001        | -0.000        |
|          |     |         |         |         | $\langle 90 T^0, b^3, s^0\rangle$ | 11.52%        | 0.000         | 0.000         | 0.000         |
|          |     |         |         |         | $\langle 90 T^0, b^1, s^1\rangle$ | 11.13%        | -0.001        | 0.003         | 0.000         |
|          |     |         |         |         | $\langle 90 T^0, b^0, s^1\rangle$ | 0.01%         | -0.001        | -0.003        | 0.000         |
| 4815.8   | 1.4 | -0.004  | 0.010   | -0.000  | $\langle 91 T^0, b^3, s^0\rangle$ | 32.88%        | 0.000         | -0.003        | 0.000         |
|          |     |         |         |         | $\langle 91 T^0, b^1, s^1\rangle$ | 20.42%        | 0.001         | -0.004        | -0.000        |
|          |     |         |         |         | $\langle 91 T^0, b^1, s^1\rangle$ | 12.97%        | -0.000        | 0.005         | 0.000         |
|          |     |         |         |         | $\langle 91 T^0, b^0, s^1\rangle$ | 0.01%         | 0.001         | 0.005         | -0.000        |
|          |     |         |         |         | $\langle 91 T^0, b^1, s^1\rangle$ | 9.30%         | -0.001        | 0.004         | -0.000        |
| 4818.4   | 0.7 | 0.007   | 0.002   | -0.000  | $\langle 92 T^0, b^1, s^1\rangle$ | 45.90%        | 0.009         | 0.002         | 0.000         |
|          |     |         |         |         | $\langle 92 T^0, b^3, s^0\rangle$ | 20.25%        | -0.002        | -0.000        | -0.000        |
|          |     |         |         |         | $\langle 92 T^0, b^3, s^0\rangle$ | 11.72%        | 0.000         | 0.000         | 0.000         |
|          |     |         |         |         | $\langle 92 T^0, b^0, s^1\rangle$ | 0.01%         | 0.004         | -0.001        | 0.000         |
|          |     |         |         |         | $\langle 92 T^0, b^1, s^1\rangle$ | 8.13%         | -0.003        | 0.001         | 0.000         |
| 4904.3   | 4.4 | 0.016   | -0.010  | -0.000  | $\langle 94 T^0, b^1, s^1\rangle$ | 28.46%        | 0.006         | -0.001        | -0.000        |
|          |     |         |         |         | $\langle 94 T^0, b^1, s^1\rangle$ | 15.21%        | 0.001         | -0.006        | 0.000         |
|          |     |         |         |         | $\langle 94 T^0, b^1, s^1\rangle$ | 14.43%        | 0.005         | 0.001         | 0.000         |
|          |     |         |         |         | $\langle 94 T^0, b^1, s^1\rangle$ | 10.92%        | 0.004         | 0.001         | -0.000        |
|          |     |         |         |         | $\langle 94 T^0, b^1, s^1\rangle$ | 10.02%        | 0.001         | -0.002        | -0.000        |
| 4911.4   | 4.6 | 0.010   | 0.017   | 0.000   | $\langle 95 T^0, b^1, s^1\rangle$ | 21.93%        | -0.001        | 0.007         | -0.000        |
|          |     |         |         |         | $\langle 95 T^0, b^1, s^1\rangle$ | 19.41%        | -0.000        | 0.006         | 0.000         |
|          |     |         |         |         | $\langle 95 T^0, b^1, s^1\rangle$ | 16.72%        | 0.006         | 0.002         | -0.000        |
|          |     |         |         |         | $\langle 95 T^0, b^1, s^1\rangle$ | 10.94%        | 0.004         | 0.001         | 0.000         |
| 4923.8   | 0.1 | -0.002  | -0.002  | -0.000  | $\langle 96 T^1, b^1, s^1\rangle$ | 23.22%        | 0.001         | 0.000         | 0.000         |
|          |     |         |         |         | $\langle 96 T^1, b^3, s^0\rangle$ | 16.95%        | 0.000         | 0.000         | 0.000         |
|          |     |         |         |         | $\langle 96 T^1, b^1, s^1\rangle$ | 12.68%        | -0.001        | 0.000         | -0.000        |
|          |     |         |         |         | $\langle 96 T^1, b^1, s^1\rangle$ | 12.14%        | 0.000         | -0.001        | -0.000        |
|          |     |         |         |         | $\langle 96 T^0, b^1, s^1\rangle$ | 2.04%         | -0.002        | -0.001        | 0.000         |
|          |     |         |         |         | $\langle 96 T^0, b^0, s^1\rangle$ | 0.00%         | -0.000        | -0.001        | 0.000         |
| 4925.6   | 0.1 | -0.001  | 0.002   | 0.000   | $\langle 97 T^1, b^3, s^0\rangle$ | 29.79%        | 0.000         | 0.000         | 0.000         |
|          |     |         |         |         | $\langle 97 T^1, b^1, s^1\rangle$ | 15.83%        | -0.000        | 0.001         | 0.000         |
|          |     |         |         |         | $\langle 97 T^1, b^1, s^1\rangle$ | 10.32%        | -0.000        | -0.001        | 0.000         |
|          |     |         |         |         | $\langle 97 T^0, b^1, s^1\rangle$ | 1.26%         | -0.000        | 0.002         | 0.000         |
|          |     |         |         |         | $\langle 97 T^0, b^1, s^1\rangle$ | 1.00%         | -0.000        | 0.001         | -0.000        |
|          |     |         |         |         | $\langle 97 T^0, b^0, s^1\rangle$ | 0.00%         | 0.000         | 0.001         | -0.000        |
| 4950.1   | 0.1 | 0.001   | 0.003   | 0.000   | $\langle 99 T^0, b^3, s^0\rangle$ | 38.51%        | -0.000        | 0.003         | -0.000        |
|          |     |         |         |         | $\langle 99 T^0, b^1, s^1\rangle$ | 25.65%        | 0.001         | -0.004        | -0.000        |
|          |     |         |         |         | $\langle 99 T^0, b^0, s^1\rangle$ | 0.01%         | 0.001         | 0.003         | -0.000        |

|        |     |        |        |        |                                    |        |        |        |        |
|--------|-----|--------|--------|--------|------------------------------------|--------|--------|--------|--------|
| 4951.6 | 0.2 | -0.004 | 0.001  | 0.000  | $\langle 100 T^0, b^3, s^0\rangle$ | 38.88% | -0.003 | -0.000 | -0.000 |
|        |     |        |        |        | $\langle 100 T^0, b^1, s^1\rangle$ | 22.52% | 0.005  | -0.001 | -0.000 |
|        |     |        |        |        | $\langle 100 T^0, b^0, s^1\rangle$ | 0.01%  | -0.003 | 0.001  | -0.000 |
| 4994.3 | 0.1 | -0.002 | -0.002 | 0.000  | $\langle 107 T^1, b^3, s^0\rangle$ | 24.83% | 0.000  | 0.000  | 0.000  |
|        |     |        |        |        | $\langle 107 T^1, b^1, s^1\rangle$ | 15.97% | 0.000  | 0.000  | 0.000  |
|        |     |        |        |        | $\langle 107 T^0, b^1, s^1\rangle$ | 4.78%  | -0.003 | -0.001 | 0.000  |
|        |     |        |        |        | $\langle 107 T^0, b^1, s^1\rangle$ | 2.76%  | 0.000  | -0.002 | -0.000 |
|        |     |        |        |        | $\langle 107 T^0, b^1, s^1\rangle$ | 2.16%  | 0.002  | -0.000 | -0.000 |
| 4996.9 | 0.3 | 0.000  | -0.005 | 0.000  | $\langle 108 T^1, b^1, s^1\rangle$ | 18.85% | 0.000  | 0.000  | 0.000  |
|        |     |        |        |        | $\langle 108 T^1, b^3, s^0\rangle$ | 14.22% | 0.000  | 0.000  | 0.000  |
|        |     |        |        |        | $\langle 108 T^0, b^0, s^1\rangle$ | 0.00%  | -0.001 | -0.003 | 0.000  |
|        |     |        |        |        | $\langle 108 T^0, b^1, s^1\rangle$ | 3.09%  | 0.000  | -0.002 | -0.000 |
| 4999.8 | 0.4 | 0.005  | -0.001 | 0.000  | $\langle 109 T^1, b^1, s^1\rangle$ | 26.35% | 0.000  | 0.000  | 0.000  |
|        |     |        |        |        | $\langle 109 T^1, b^3, s^0\rangle$ | 16.30% | 0.000  | 0.000  | 0.000  |
|        |     |        |        |        | $\langle 109 T^1, b^3, s^0\rangle$ | 14.53% | 0.000  | 0.000  | 0.000  |
|        |     |        |        |        | $\langle 109 T^0, b^1, s^1\rangle$ | 5.46%  | -0.003 | 0.000  | 0.000  |
|        |     |        |        |        | $\langle 109 T^0, b^0, s^1\rangle$ | 0.00%  | 0.003  | -0.001 | 0.000  |
|        |     |        |        |        | $\langle 109 T^0, b^1, s^1\rangle$ | 3.74%  | 0.002  | 0.000  | 0.000  |
| 5021.8 | 0.2 | -0.003 | 0.002  | -0.000 | $\langle 112 T^1, b^3, s^0\rangle$ | 22.61% | 0.000  | 0.000  | 0.000  |
|        |     |        |        |        | $\langle 112 T^1, b^1, s^1\rangle$ | 14.14% | 0.000  | 0.000  | 0.000  |
|        |     |        |        |        | $\langle 112 T^0, b^1, s^1\rangle$ | 0.92%  | -0.001 | -0.000 | 0.000  |
|        |     |        |        |        | $\langle 112 T^0, b^1, s^1\rangle$ | 0.78%  | -0.000 | 0.001  | -0.000 |
|        |     |        |        |        | $\langle 112 T^0, b^1, s^1\rangle$ | 1.26%  | -0.001 | 0.000  | 0.000  |
| 5025.9 | 0.1 | 0.002  | 0.003  | -0.000 | $\langle 113 T^1, b^1, s^1\rangle$ | 14.85% | 0.000  | -0.001 | -0.000 |
|        |     |        |        |        | $\langle 113 T^1, b^1, s^1\rangle$ | 13.06% | -0.000 | -0.001 | 0.000  |
|        |     |        |        |        | $\langle 113 T^1, b^1, s^1\rangle$ | 11.78% | -0.001 | -0.000 | -0.000 |
|        |     |        |        |        | $\langle 113 T^0, b^1, s^1\rangle$ | 1.11%  | -0.000 | 0.002  | -0.000 |
|        |     |        |        |        | $\langle 113 T^0, b^1, s^1\rangle$ | 1.26%  | -0.000 | 0.002  | 0.000  |
|        |     |        |        |        | $\langle 113 T^0, b^1, s^1\rangle$ | 1.07%  | 0.001  | 0.000  | -0.000 |
| 5119.1 | 0.1 | 0.000  | 0.002  | -0.000 | $\langle 132 T^1, b^3, s^0\rangle$ | 26.63% | 0.000  | 0.000  | 0.000  |
|        |     |        |        |        | $\langle 132 T^1, b^1, s^1\rangle$ | 20.22% | 0.000  | -0.000 | -0.000 |
|        |     |        |        |        | $\langle 132 T^1, b^3, s^0\rangle$ | 13.28% | 0.000  | 0.000  | 0.000  |
|        |     |        |        |        | $\langle 132 T^1, b^1, s^1\rangle$ | 10.60% | -0.000 | 0.000  | 0.000  |
|        |     |        |        |        | $\langle 132 T^0, b^1, s^1\rangle$ | 0.57%  | -0.000 | 0.001  | 0.000  |
|        |     |        |        |        | $\langle 132 T^0, b^1, s^1\rangle$ | 0.18%  | -0.000 | 0.001  | -0.000 |
| 5124.9 | 0.1 | 0.002  | 0.000  | 0.000  | $\langle 136 T^1, b^3, s^0\rangle$ | 21.85% | 0.000  | 0.000  | 0.000  |
|        |     |        |        |        | $\langle 136 T^1, b^3, s^0\rangle$ | 17.05% | 0.000  | 0.000  | 0.000  |
|        |     |        |        |        | $\langle 136 T^1, b^1, s^1\rangle$ | 13.34% | 0.000  | 0.000  | 0.000  |
|        |     |        |        |        | $\langle 136 T^1, b^1, s^1\rangle$ | 12.32% | 0.000  | 0.000  | 0.000  |
|        |     |        |        |        | $\langle 136 T^0, b^1, s^1\rangle$ | 0.47%  | 0.001  | 0.000  | 0.000  |
|        |     |        |        |        | $\langle 136 T^0, b^1, s^1\rangle$ | 0.23%  | 0.001  | 0.000  | -0.000 |
|        |     |        |        |        | $\langle 136 T^0, b^1, s^1\rangle$ | 0.08%  | -0.000 | 0.000  | 0.000  |
| 6306.1 | 1.0 | -0.007 | 0.004  | -0.000 | $\langle 190 T^0, b^0, s^2\rangle$ | 64.60% | -0.007 | 0.004  | -0.000 |

|        |     |        |        |        |                                    |        |        |        |        |
|--------|-----|--------|--------|--------|------------------------------------|--------|--------|--------|--------|
|        |     |        |        |        | $\langle 190 T^0, b^0, s^1\rangle$ | 0.01%  | 0.004  | -0.001 | 0.000  |
|        |     |        |        |        | $\langle 190 T^0, b^0, s^2\rangle$ | 1.85%  | -0.002 | 0.000  | 0.000  |
| 6317.6 | 1.0 | -0.007 | -0.003 | 0.000  | $\langle 191 T^0, b^0, s^2\rangle$ | 56.21% | -0.009 | 0.001  | 0.000  |
|        |     |        |        |        | $\langle 191 T^0, b^0, s^1\rangle$ | 0.01%  | 0.005  | -0.001 | 0.000  |
|        |     |        |        |        | $\langle 191 T^0, b^0, s^2\rangle$ | 6.14%  | -0.001 | -0.004 | -0.000 |
| 6323.3 | 1.1 | -0.001 | -0.008 | -0.000 | $\langle 192 T^0, b^0, s^2\rangle$ | 56.71% | -0.003 | -0.011 | -0.000 |
|        |     |        |        |        | $\langle 192 T^0, b^0, s^1\rangle$ | 0.02%  | 0.001  | 0.006  | -0.000 |
|        |     |        |        |        | $\langle 192 T^0, b^0, s^2\rangle$ | 6.26%  | 0.003  | -0.000 | -0.000 |
| 6399.3 | 0.4 | -0.005 | 0.001  | 0.000  | $\langle 193 T^0, b^2, s^1\rangle$ | 25.64% | 0.006  | -0.001 | 0.000  |
|        |     |        |        |        | $\langle 193 T^0, b^4, s^0\rangle$ | 21.91% | 0.000  | 0.000  | 0.000  |
|        |     |        |        |        | $\langle 193 T^0, b^2, s^1\rangle$ | 11.80% | 0.000  | 0.000  | 0.000  |
|        |     |        |        |        | $\langle 193 T^0, b^0, s^1\rangle$ | 0.03%  | -0.008 | 0.002  | -0.000 |
|        |     |        |        |        | $\langle 193 T^0, b^0, s^2\rangle$ | 4.25%  | -0.003 | 0.000  | 0.000  |
| 6402.7 | 0.1 | 0.002  | 0.001  | -0.000 | $\langle 194 T^0, b^4, s^0\rangle$ | 27.03% | 0.000  | 0.000  | 0.000  |
|        |     |        |        |        | $\langle 194 T^0, b^2, s^1\rangle$ | 21.90% | 0.001  | -0.001 | -0.001 |
|        |     |        |        |        | $\langle 194 T^0, b^2, s^1\rangle$ | 11.13% | -0.000 | -0.000 | 0.000  |
|        |     |        |        |        | $\langle 194 T^0, b^0, s^1\rangle$ | 0.01%  | 0.004  | -0.001 | 0.000  |
|        |     |        |        |        | $\langle 194 T^0, b^2, s^1\rangle$ | 7.25%  | -0.003 | 0.001  | -0.000 |
|        |     |        |        |        | $\langle 194 T^0, b^0, s^2\rangle$ | 6.58%  | 0.003  | -0.000 | -0.000 |
| 6405.9 | 0.5 | -0.000 | 0.005  | 0.000  | $\langle 195 T^0, b^2, s^1\rangle$ | 32.23% | -0.001 | -0.007 | 0.000  |
|        |     |        |        |        | $\langle 195 T^0, b^4, s^0\rangle$ | 21.02% | 0.000  | 0.000  | 0.000  |
|        |     |        |        |        | $\langle 195 T^0, b^2, s^1\rangle$ | 11.40% | 0.000  | 0.000  | 0.000  |
|        |     |        |        |        | $\langle 195 T^0, b^0, s^2\rangle$ | 10.03% | 0.001  | 0.005  | 0.000  |
|        |     |        |        |        | $\langle 195 T^0, b^0, s^1\rangle$ | 0.04%  | 0.002  | 0.009  | -0.000 |
| 6419.4 | 0.3 | 0.003  | 0.003  | 0.000  | $\langle 196 T^0, b^2, s^1\rangle$ | 20.19% | -0.000 | -0.000 | -0.000 |
|        |     |        |        |        | $\langle 196 T^0, b^2, s^1\rangle$ | 18.49% | 0.000  | 0.000  | 0.000  |
|        |     |        |        |        | $\langle 196 T^0, b^4, s^0\rangle$ | 11.52% | 0.000  | 0.000  | 0.000  |
|        |     |        |        |        | $\langle 196 T^0, b^0, s^2\rangle$ | 3.43%  | 0.001  | 0.003  | 0.000  |
|        |     |        |        |        | $\langle 196 T^0, b^0, s^2\rangle$ | 4.31%  | 0.001  | 0.002  | -0.000 |
|        |     |        |        |        | $\langle 196 T^0, b^0, s^2\rangle$ | 2.20%  | 0.001  | -0.001 | 0.000  |
| 6420.3 | 0.1 | 0.001  | -0.002 | -0.000 | $\langle 197 T^1, b^0, s^2\rangle$ | 16.34% | -0.000 | 0.000  | -0.001 |
|        |     |        |        |        | $\langle 197 T^0, b^2, s^1\rangle$ | 14.19% | 0.000  | 0.000  | 0.000  |
|        |     |        |        |        | $\langle 197 T^0, b^2, s^1\rangle$ | 12.82% | 0.000  | 0.000  | 0.000  |
|        |     |        |        |        | $\langle 197 T^0, b^0, s^2\rangle$ | 2.98%  | 0.001  | -0.001 | 0.000  |
|        |     |        |        |        | $\langle 197 T^0, b^0, s^2\rangle$ | 2.37%  | -0.001 | -0.001 | 0.000  |
|        |     |        |        |        | $\langle 197 T^0, b^0, s^2\rangle$ | 0.48%  | -0.000 | -0.001 | -0.000 |
| 6425.3 | 0.1 | -0.002 | 0.002  | 0.000  | $\langle 198 T^1, b^0, s^2\rangle$ | 44.44% | -0.001 | 0.000  | -0.001 |
|        |     |        |        |        | $\langle 198 T^1, b^0, s^0\rangle$ | 0.01%  | -0.000 | -0.000 | 0.002  |
|        |     |        |        |        | $\langle 198 T^0, b^0, s^2\rangle$ | 1.61%  | -0.001 | 0.000  | -0.000 |
| 6521.1 | 0.1 | -0.002 | 0.001  | 0.000  | $\langle 209 T^1, b^0, s^2\rangle$ | 11.95% | -0.002 | 0.001  | 0.000  |
|        |     |        |        |        | $\langle 209 T^0, b^0, s^2\rangle$ | 8.25%  | -0.002 | 0.002  | -0.000 |
|        |     |        |        |        | $\langle 209 T^1, b^0, s^0\rangle$ | 0.00%  | 0.001  | -0.000 | -0.000 |
| 6526.7 | 0.1 | -0.002 | -0.001 | -0.000 | $\langle 211 T^0, b^2, s^1\rangle$ | 12.81% | 0.001  | 0.004  | -0.000 |
|        |     |        |        |        | $\langle 211 T^0, b^0, s^1\rangle$ | 0.01%  | -0.001 | -0.003 | 0.000  |
|        |     |        |        |        | $\langle 211 T^0, b^0, s^2\rangle$ | 3.43%  | -0.002 | 0.000  | 0.000  |

|        |     |        |        |        |                                    |        |        |        |        |
|--------|-----|--------|--------|--------|------------------------------------|--------|--------|--------|--------|
| 6533.6 | 0.1 | -0.002 | -0.000 | -0.000 | $\langle 214 T^1, b^2, s^1\rangle$ | 12.91% | 0.000  | 0.000  | 0.000  |
|        |     |        |        |        | $\langle 214 T^1, b^2, s^1\rangle$ | 11.41% | 0.000  | 0.000  | 0.000  |
|        |     |        |        |        | $\langle 214 T^1, b^4, s^0\rangle$ | 11.09% | 0.000  | 0.000  | 0.000  |
|        |     |        |        |        | $\langle 214 T^0, b^0, s^1\rangle$ | 0.00%  | 0.003  | -0.001 | 0.000  |
|        |     |        |        |        | $\langle 214 T^0, b^0, s^2\rangle$ | 2.85%  | -0.002 | 0.000  | 0.000  |
|        |     |        |        |        | $\langle 214 T^0, b^2, s^1\rangle$ | 1.27%  | -0.001 | 0.000  | -0.000 |
| 6537.8 | 0.1 | 0.000  | 0.003  | 0.000  | $\langle 215 T^1, b^2, s^1\rangle$ | 13.61% | 0.000  | 0.001  | 0.000  |
|        |     |        |        |        | $\langle 215 T^1, b^0, s^2\rangle$ | 10.79% | -0.000 | 0.001  | -0.000 |
|        |     |        |        |        | $\langle 215 T^0, b^0, s^1\rangle$ | 0.01%  | -0.001 | -0.005 | 0.000  |
|        |     |        |        |        | $\langle 215 T^0, b^0, s^2\rangle$ | 9.06%  | 0.001  | 0.004  | 0.000  |
|        |     |        |        |        | $\langle 215 T^0, b^2, s^1\rangle$ | 2.05%  | 0.000  | 0.002  | -0.000 |
| 6562.4 | 0.1 | -0.002 | -0.001 | 0.000  | $\langle 218 T^0, b^0, s^2\rangle$ | 19.62% | -0.002 | -0.003 | 0.000  |
|        |     |        |        |        | $\langle 218 T^2, b^0, s^2\rangle$ | 12.63% | 0.000  | 0.000  | 0.000  |
|        |     |        |        |        | $\langle 218 T^0, b^4, s^0\rangle$ | 12.50% | 0.000  | 0.000  | 0.000  |
|        |     |        |        |        | $\langle 218 T^0, b^0, s^1\rangle$ | 0.00%  | 0.003  | -0.001 | 0.000  |
|        |     |        |        |        | $\langle 218 T^0, b^0, s^1\rangle$ | 0.00%  | 0.001  | 0.003  | -0.000 |
| 6567.3 | 0.1 | -0.001 | 0.002  | 0.000  | $\langle 220 T^0, b^4, s^0\rangle$ | 14.57% | 0.000  | 0.000  | 0.000  |
|        |     |        |        |        | $\langle 220 T^0, b^0, s^2\rangle$ | 12.97% | 0.001  | 0.003  | -0.000 |
|        |     |        |        |        | $\langle 220 T^0, b^0, s^1\rangle$ | 0.01%  | -0.001 | -0.003 | 0.000  |
|        |     |        |        |        | $\langle 220 T^0, b^0, s^2\rangle$ | 9.21%  | -0.002 | 0.001  | -0.000 |
| 6619.1 | 0.1 | 0.002  | -0.001 | -0.000 | $\langle 235 T^0, b^4, s^0\rangle$ | 13.90% | 0.000  | 0.000  | 0.000  |
|        |     |        |        |        | $\langle 235 T^0, b^2, s^1\rangle$ | 10.50% | 0.000  | 0.000  | 0.000  |
|        |     |        |        |        | $\langle 235 T^0, b^2, s^1\rangle$ | 3.19%  | -0.002 | 0.000  | -0.000 |
|        |     |        |        |        | $\langle 235 T^0, b^0, s^1\rangle$ | 0.00%  | 0.002  | -0.000 | 0.000  |
|        |     |        |        |        | $\langle 235 T^0, b^0, s^2\rangle$ | 1.10%  | 0.001  | -0.000 | -0.000 |
| 6621.8 | 0.1 | 0.000  | 0.003  | 0.000  | $\langle 236 T^0, b^4, s^0\rangle$ | 15.69% | 0.000  | 0.000  | 0.000  |
|        |     |        |        |        | $\langle 236 T^0, b^2, s^1\rangle$ | 10.80% | 0.000  | 0.000  | 0.000  |
|        |     |        |        |        | $\langle 236 T^0, b^0, s^2\rangle$ | 2.32%  | 0.001  | 0.002  | 0.000  |
|        |     |        |        |        | $\langle 236 T^0, b^2, s^1\rangle$ | 2.80%  | -0.000 | -0.002 | 0.000  |
|        |     |        |        |        | $\langle 236 T^0, b^0, s^1\rangle$ | 0.00%  | 0.000  | 0.002  | -0.000 |
| 6622.3 | 0.1 | -0.002 | -0.001 | 0.000  | $\langle 237 T^2, b^0, s^2\rangle$ | 19.48% | 0.000  | 0.000  | 0.000  |
|        |     |        |        |        | $\langle 237 T^0, b^0, s^2\rangle$ | 0.71%  | -0.000 | -0.001 | -0.000 |
|        |     |        |        |        | $\langle 237 T^0, b^2, s^1\rangle$ | 0.89%  | 0.000  | 0.001  | -0.000 |
|        |     |        |        |        | $\langle 237 T^0, b^0, s^1\rangle$ | 0.00%  | -0.000 | -0.001 | 0.000  |

| $\omega$ | $I$  | $\mu_x$ | $\mu_y$ | $\mu_z$ | Assignment                                      | $ c_{ijk}^2 $ | $\mu_x^{ijk}$ | $\mu_y^{ijk}$ | $\mu_z^{ijk}$ |
|----------|------|---------|---------|---------|-------------------------------------------------|---------------|---------------|---------------|---------------|
| 4259.1   | 2.1  | -0.000  | 0.000   | 0.014   | $\langle 27 T^0, b^1, s_{\text{HB}}^1\rangle$   | 74.39%        | 0.000         | -0.000        | 0.006         |
|          |      |         |         |         | $\langle 27 T^1, b^1, s_{\text{HB}}^1\rangle$   | 20.34%        | -0.000        | 0.000         | 0.001         |
|          |      |         |         |         | $\langle 27 T^0, b^0, s_{\text{free}}^1\rangle$ | 0.05%         | -0.000        | 0.000         | 0.005         |
|          |      |         |         |         | $\langle 27 T^0, b^1, s^0\rangle$               | 0.01%         | 0.000         | 0.000         | 0.001         |
| 4268.1   | 0.5  | 0.005   | -0.005  | 0.000   | $\langle 28 T^0, b^1, s_{\text{HB}}^1\rangle$   | 73.01%        | 0.003         | 0.038         | -0.000        |
|          |      |         |         |         | $\langle 28 T^1, b^1, s_{\text{HB}}^1\rangle$   | 19.44%        | 0.000         | 0.005         | -0.000        |
|          |      |         |         |         | $\langle 28 T^0, b^0, s_{\text{HB}}^1\rangle$   | 0.55%         | -0.000        | -0.042        | -0.000        |
|          |      |         |         |         | $\langle 28 T^1, b^0, s_{\text{HB}}^1\rangle$   | 0.24%         | -0.000        | -0.007        | 0.000         |
| 4607.9   | 0.2  | -0.000  | -0.000  | 0.005   | $\langle 29 T^1, b^1, s_{\text{HB}}^1\rangle$   | 54.50%        | 0.000         | -0.000        | -0.002        |
|          |      |         |         |         | $\langle 29 T^0, b^1, s_{\text{HB}}^1\rangle$   | 22.87%        | 0.000         | -0.000        | 0.003         |
|          |      |         |         |         | $\langle 29 T^2, b^1, s_{\text{HB}}^1\rangle$   | 20.25%        | -0.000        | -0.000        | -0.000        |
|          |      |         |         |         | $\langle 29 T^0, b^1, s^0\rangle$               | 0.04%         | 0.000         | 0.000         | 0.003         |
|          |      |         |         |         | $\langle 29 T^0, b^0, s_{\text{free}}^1\rangle$ | 0.01%         | -0.000        | 0.000         | 0.002         |
| 4619.4   | 0.3  | -0.001  | -0.005  | -0.000  | $\langle 30 T^1, b^1, s_{\text{HB}}^1\rangle$   | 53.58%        | 0.000         | 0.009         | -0.000        |
|          |      |         |         |         | $\langle 30 T^0, b^1, s_{\text{HB}}^1\rangle$   | 22.88%        | -0.002        | -0.021        | 0.000         |
|          |      |         |         |         | $\langle 30 T^2, b^1, s_{\text{HB}}^1\rangle$   | 19.92%        | 0.000         | 0.002         | -0.000        |
|          |      |         |         |         | $\langle 30 T^0, b^0, s_{\text{HB}}^1\rangle$   | 0.09%         | 0.000         | 0.017         | 0.000         |
| 4846.2   | 0.1  | -0.000  | -0.002  | 0.000   | $\langle 31 T^0, b^3, s^0\rangle$               | 84.75%        | 0.002         | 0.003         | 0.000         |
|          |      |         |         |         | $\langle 31 T^0, b^1, s^0\rangle$               | 0.14%         | -0.002        | -0.003        | -0.000        |
|          |      |         |         |         | $\langle 31 T^0, b^0, s_{\text{HB}}^1\rangle$   | 0.00%         | -0.000        | -0.003        | -0.000        |
| 4955.5   | 0.1  | -0.001  | -0.002  | -0.000  | $\langle 33 T^0, b^3, s^0\rangle$               | 89.01%        | -0.000        | 0.002         | 0.000         |
|          |      |         |         |         | $\langle 33 T^0, b^1, s_{\text{free}}^1\rangle$ | 4.97%         | -0.000        | -0.003        | 0.000         |
|          |      |         |         |         | $\langle 33 T^0, b^1, s_{\text{HB}}^1\rangle$   | 0.24%         | -0.000        | -0.002        | 0.000         |
| 4983.8   | 0.2  | 0.000   | -0.000  | 0.004   | $\langle 34 T^0, b^3, s^0\rangle$               | 93.34%        | -0.000        | 0.000         | 0.004         |
|          |      |         |         |         | $\langle 34 T^0, b^1, s^0\rangle$               | 0.03%         | -0.000        | -0.000        | -0.002        |
|          |      |         |         |         | $\langle 34 T^0, b^0, s_{\text{free}}^1\rangle$ | 0.00%         | -0.000        | 0.000         | 0.001         |
| 5126.3   | 18.9 | -0.002  | -0.038  | -0.000  | $\langle 38 T^0, b^0, s_{\text{HB}}^2\rangle$   | 62.24%        | -0.002        | -0.025        | -0.000        |
|          |      |         |         |         | $\langle 38 T^1, b^0, s_{\text{HB}}^2\rangle$   | 25.99%        | -0.000        | 0.002         | 0.000         |
|          |      |         |         |         | $\langle 38 T^0, b^0, s_{\text{HB}}^1\rangle$   | 0.01%         | -0.000        | -0.006        | -0.000        |
|          |      |         |         |         | $\langle 38 T^1, b^0, s^0\rangle$               | 0.01%         | -0.000        | -0.004        | -0.000        |
| 5145.1   | 4.8  | -0.004  | -0.019  | -0.000  | $\langle 39 T^0, b^1, s_{\text{free}}^1\rangle$ | 82.11%        | -0.003        | -0.006        | 0.000         |
|          |      |         |         |         | $\langle 39 T^0, b^0, s_{\text{HB}}^1\rangle$   | 0.01%         | -0.000        | -0.005        | -0.000        |
|          |      |         |         |         | $\langle 39 T^0, b^0, s_{\text{HB}}^2\rangle$   | 1.82%         | -0.000        | -0.004        | -0.000        |
| 5177.4   | 2.1  | 0.000   | 0.000   | -0.013  | $\langle 41 T^0, b^1, s_{\text{free}}^1\rangle$ | 71.10%        | -0.000        | -0.000        | -0.005        |
|          |      |         |         |         | $\langle 41 T^0, b^1, s_{\text{free}}^1\rangle$ | 11.06%        | -0.000        | -0.000        | 0.003         |
|          |      |         |         |         | $\langle 41 T^0, b^3, s^0\rangle$               | 10.31%        | -0.000        | 0.000         | -0.001        |
|          |      |         |         |         | $\langle 41 T^0, b^0, s_{\text{free}}^1\rangle$ | 0.13%         | 0.000         | -0.000        | -0.008        |
| 5186.3   | 2.4  | -0.000  | 0.000   | -0.014  | $\langle 42 T^0, b^1, s_{\text{free}}^1\rangle$ | 80.01%        | 0.000         | 0.000         | -0.008        |
|          |      |         |         |         | $\langle 42 T^0, b^1, s_{\text{free}}^1\rangle$ | 15.87%        | -0.000        | -0.000        | -0.002        |
|          |      |         |         |         | $\langle 42 T^0, b^0, s_{\text{free}}^1\rangle$ | 0.04%         | 0.000         | -0.000        | -0.005        |



|        |     |        |        |        |                                                                 |        |        |        |        |
|--------|-----|--------|--------|--------|-----------------------------------------------------------------|--------|--------|--------|--------|
| 5243.2 | 4.2 | -0.002 | -0.018 | 0.000  | $\langle 45 T^0, b^1, s_{\text{free}}^1\rangle$                 | 88.86% | -0.001 | -0.012 | 0.000  |
|        |     |        |        |        | $\langle 45 T^0, b^0, s_{\text{HB}}^1\rangle$                   | 0.01%  | -0.000 | -0.005 | -0.000 |
|        |     |        |        |        | $\langle 45 T^0, b^0, s_{\text{HB}}^2\rangle$                   | 0.13%  | -0.000 | -0.001 | -0.000 |
| 5569.9 | 1.6 | -0.001 | -0.011 | 0.000  | $\langle 54 T^1, b^0, s_{\text{HB}}^2\rangle$                   | 39.55% | 0.000  | -0.003 | -0.000 |
|        |     |        |        |        | $\langle 54 T^0, b^0, s_{\text{HB}}^2\rangle$                   | 30.86% | -0.001 | -0.018 | -0.000 |
|        |     |        |        |        | $\langle 54 T^2, b^0, s_{\text{HB}}^2\rangle$                   | 26.18% | -0.000 | -0.004 | -0.000 |
|        |     |        |        |        | $\langle 54 T^0, b^0, s_{\text{HB}}^1\rangle$                   | 0.05%  | 0.000  | 0.012  | 0.000  |
| 5843.5 | 0.3 | -0.000 | -0.004 | 0.000  | $\langle 59 T^0, b^2, s_{\text{HB}}^1\rangle$                   | 51.19% | 0.000  | 0.006  | -0.000 |
|        |     |        |        |        | $\langle 59 T^0, b^2, s_{\text{HB}}^1\rangle$                   | 19.35% | 0.000  | 0.006  | -0.000 |
|        |     |        |        |        | $\langle 59 T^1, b^2, s_{\text{HB}}^1\rangle$                   | 15.33% | 0.000  | 0.000  | 0.000  |
|        |     |        |        |        | $\langle 59 T^0, b^0, s_{\text{HB}}^1\rangle$                   | 0.07%  | -0.000 | -0.015 | -0.000 |
| 5866.0 | 0.1 | -0.000 | 0.002  | 0.000  | $\langle 61 T^0, b^2, s_{\text{HB}}^1\rangle$                   | 48.72% | 0.000  | 0.009  | -0.000 |
|        |     |        |        |        | $\langle 61 T^0, b^2, s_{\text{HB}}^1\rangle$                   | 20.40% | -0.000 | -0.004 | 0.000  |
|        |     |        |        |        | $\langle 61 T^1, b^2, s_{\text{HB}}^1\rangle$                   | 13.53% | -0.000 | 0.002  | -0.000 |
|        |     |        |        |        | $\langle 61 T^0, b^1, s_{\text{HB}}^1\rangle$                   | 0.71%  | -0.000 | -0.004 | 0.000  |
| 6199.2 | 0.2 | 0.002  | 0.003  | -0.000 | $\langle 63 T^0, b^0, s_{\text{HB}}^1 s_{\text{free}}^1\rangle$ | 39.42% | 0.002  | -0.003 | 0.000  |
|        |     |        |        |        | $\langle 63 T^1, b^2, s_{\text{HB}}^1\rangle$                   | 17.43% | 0.000  | 0.000  | 0.000  |
|        |     |        |        |        | $\langle 63 T^1, b^2, s_{\text{HB}}^1\rangle$                   | 12.82% | -0.000 | 0.002  | -0.000 |
|        |     |        |        |        | $\langle 63 T^0, b^0, s_{\text{HB}}^1\rangle$                   | 0.02%  | 0.000  | 0.008  | 0.000  |
|        |     |        |        |        | $\langle 63 T^0, b^2, s_{\text{HB}}^1\rangle$                   | 7.33%  | -0.000 | -0.002 | 0.000  |
| 6201.1 | 0.1 | -0.002 | -0.001 | -0.000 | $\langle 64 T^0, b^0, s_{\text{HB}}^1 s_{\text{free}}^1\rangle$ | 37.52% | -0.002 | 0.003  | -0.000 |
|        |     |        |        |        | $\langle 64 T^1, b^2, s_{\text{HB}}^1\rangle$                   | 18.96% | 0.000  | 0.000  | 0.000  |
|        |     |        |        |        | $\langle 64 T^1, b^0, s_{\text{HB}}^1 s_{\text{free}}^1\rangle$ | 11.68% | -0.000 | 0.001  | 0.000  |
|        |     |        |        |        | $\langle 64 T^0, b^2, s_{\text{HB}}^1\rangle$                   | 10.13% | -0.000 | -0.003 | 0.000  |
|        |     |        |        |        | $\langle 64 T^0, b^2, s_{\text{HB}}^1\rangle$                   | 4.93%  | -0.000 | -0.003 | 0.000  |
| 6258.9 | 0.2 | -0.000 | -0.000 | -0.003 | $\langle 67 T^0, b^0, s_{\text{HB}}^1 s_{\text{free}}^1\rangle$ | 76.13% | 0.000  | 0.000  | -0.004 |
|        |     |        |        |        | $\langle 67 T^1, b^0, s_{\text{HB}}^1 s_{\text{free}}^1\rangle$ | 17.53% | 0.000  | 0.000  | 0.000  |
|        |     |        |        |        | $\langle 67 T^0, b^1, s^0\rangle$                               | 0.00%  | 0.000  | 0.000  | 0.001  |
|        |     |        |        |        | $\langle 67 T^1, b^0, s_{\text{free}}^1\rangle$                 | 0.01%  | 0.000  | -0.000 | -0.000 |
| 6683.0 | 0.1 | 0.000  | 0.000  | -0.003 | $\langle 78 T^0, b^1, s_{\text{HB}}^2\rangle$                   | 61.57% | -0.000 | -0.000 | 0.000  |
|        |     |        |        |        | $\langle 78 T^1, b^1, s_{\text{HB}}^2\rangle$                   | 26.35% | -0.000 | -0.000 | 0.001  |
|        |     |        |        |        | $\langle 78 T^0, b^1, s^0\rangle$                               | 0.03%  | -0.000 | -0.000 | -0.002 |
|        |     |        |        |        | $\langle 78 T^0, b^0, s_{\text{free}}^1\rangle$                 | 0.00%  | 0.000  | -0.000 | -0.001 |
| 6749.2 | 0.2 | 0.001  | 0.003  | -0.000 | $\langle 81 T^0, b^1, s_{\text{HB}}^2\rangle$                   | 33.04% | 0.001  | -0.001 | -0.000 |
|        |     |        |        |        | $\langle 81 T^0, b^2, s_{\text{free}}^1\rangle$                 | 29.88% | 0.001  | 0.003  | 0.000  |
|        |     |        |        |        | $\langle 81 T^1, b^1, s_{\text{HB}}^2\rangle$                   | 13.82% | 0.000  | -0.002 | 0.000  |
|        |     |        |        |        | $\langle 81 T^0, b^0, s_{\text{HB}}^1\rangle$                   | 0.00%  | 0.000  | 0.004  | 0.000  |
|        |     |        |        |        | $\langle 81 T^0, b^0, s_{\text{free}}^1\rangle$                 | 0.03%  | -0.001 | -0.002 | -0.000 |
| 6755.5 | 0.1 | -0.000 | -0.000 | -0.003 | $\langle 82 T^0, b^2, s_{\text{free}}^1\rangle$                 | 57.71% | 0.000  | 0.000  | -0.004 |
|        |     |        |        |        | $\langle 82 T^1, b^4, s^0\rangle$                               | 25.77% | 0.000  | 0.000  | 0.000  |
|        |     |        |        |        | $\langle 82 T^0, b^0, s_{\text{free}}^1\rangle$                 | 0.05%  | -0.000 | 0.000  | 0.005  |
|        |     |        |        |        | $\langle 82 T^0, b^0, s_{\text{free}}^2\rangle$                 | 4.32%  | -0.000 | -0.000 | -0.004 |
| 6794.1 | 0.1 | -0.000 | 0.000  | -0.002 | $\langle 84 T^0, b^2, s_{\text{free}}^1\rangle$                 | 78.04% | 0.000  | 0.000  | -0.001 |
|        |     |        |        |        | $\langle 84 T^0, b^0, s_{\text{free}}^2\rangle$                 | 3.38%  | -0.000 | -0.000 | -0.003 |

|        |     |        |        |        |                                                 |        |        |        |        |
|--------|-----|--------|--------|--------|-------------------------------------------------|--------|--------|--------|--------|
|        |     |        |        |        | $\langle 84 T^0, b^2, s_{\text{free}}^1\rangle$ | 3.86%  | -0.000 | -0.000 | 0.001  |
|        |     |        |        |        | $\langle 84 T^0, b^0, s_{\text{free}}^1\rangle$ | 0.00%  | -0.000 | 0.000  | 0.001  |
| 6949.8 | 1.9 | 0.004  | 0.010  | -0.000 | $\langle 92 T^0, b^0, s_{\text{free}}^2\rangle$ | 88.48% | 0.005  | 0.012  | 0.000  |
|        |     |        |        |        | $\langle 92 T^0, b^2, s_{\text{free}}^1\rangle$ | 5.19%  | -0.000 | -0.001 | -0.000 |
|        |     |        |        |        | $\langle 92 T^0, b^0, s_{\text{free}}^1\rangle$ | 0.00%  | -0.001 | -0.001 | -0.000 |
| 6964.1 | 3.6 | -0.000 | -0.000 | -0.014 | $\langle 93 T^0, b^0, s_{\text{free}}^2\rangle$ | 89.13% | -0.000 | -0.000 | -0.016 |
|        |     |        |        |        | $\langle 93 T^0, b^0, s_{\text{free}}^1\rangle$ | 0.00%  | -0.000 | 0.000  | 0.001  |
|        |     |        |        |        | $\langle 93 T^0, b^2, s_{\text{free}}^1\rangle$ | 3.63%  | -0.000 | -0.000 | 0.001  |

| $\omega$ | $I$ | $\mu_x$ | $\mu_y$ | $\mu_z$ | Assignment                                      | $ c_{ijk}^2 $ | $\mu_x^{ijk}$ | $\mu_y^{ijk}$ | $\mu_z^{ijk}$ |
|----------|-----|---------|---------|---------|-------------------------------------------------|---------------|---------------|---------------|---------------|
| 4523.1   | 1.1 | -0.000  | 0.000   | 0.010   | $\langle 54 T^0, b^1, s_{\text{HB}}^1\rangle$   | 80.63%        | -0.000        | -0.000        | 0.030         |
|          |     |         |         |         | $\langle 54 T^0, b^0, s_{\text{HB}}^1\rangle$   | 0.05%         | 0.000         | 0.000         | -0.014        |
|          |     |         |         |         | $\langle 54 T^0, b^1, s_{\text{HB}}^1\rangle$   | 5.04%         | 0.000         | -0.000        | -0.005        |
| 4526.3   | 2.1 | -0.008  | 0.011   | -0.000  | $\langle 55 T^0, b^1, s_{\text{HB}}^1\rangle$   | 83.15%        | -0.004        | 0.015         | -0.000        |
|          |     |         |         |         | $\langle 55 T^0, b^0, s_{\text{HB}}^1\rangle$   | 0.05%         | -0.000        | -0.007        | -0.000        |
|          |     |         |         |         | $\langle 55 T^0, b^0, s_{\text{free}}^1\rangle$ | 0.06%         | -0.002        | 0.004         | -0.000        |
| 4598.0   | 0.2 | -0.000  | 0.000   | 0.004   | $\langle 56 T^0, b^1, s_{\text{HB}}^1\rangle$   | 73.57%        | -0.000        | 0.000         | 0.020         |
|          |     |         |         |         | $\langle 56 T^1, b^1, s_{\text{HB}}^1\rangle$   | 15.20%        | 0.000         | -0.000        | 0.001         |
|          |     |         |         |         | $\langle 56 T^0, b^0, s_{\text{HB}}^1\rangle$   | 0.12%         | 0.000         | 0.000         | -0.022        |
|          |     |         |         |         | $\langle 56 T^0, b^1, s_{\text{HB}}^1\rangle$   | 5.05%         | -0.000        | -0.000        | 0.008         |
| 4601.8   | 1.0 | 0.001   | -0.009  | 0.000   | $\langle 57 T^0, b^1, s_{\text{HB}}^1\rangle$   | 72.42%        | 0.000         | 0.006         | 0.000         |
|          |     |         |         |         | $\langle 57 T^1, b^1, s_{\text{HB}}^1\rangle$   | 15.74%        | 0.000         | 0.000         | -0.000        |
|          |     |         |         |         | $\langle 57 T^0, b^0, s_{\text{HB}}^1\rangle$   | 0.22%         | -0.000        | -0.015        | -0.000        |
|          |     |         |         |         | $\langle 57 T^0, b^1, s_{\text{HB}}^1\rangle$   | 3.61%         | -0.001        | 0.003         | -0.000        |
| 4777.9   | 0.1 | -0.000  | 0.000   | -0.003  | $\langle 58 T^1, b^1, s_{\text{HB}}^1\rangle$   | 49.91%        | -0.000        | -0.000        | 0.006         |
|          |     |         |         |         | $\langle 58 T^1, b^1, s_{\text{HB}}^1\rangle$   | 13.81%        | 0.000         | -0.000        | 0.001         |
|          |     |         |         |         | $\langle 58 T^1, b^1, s_{\text{HB}}^1\rangle$   | 12.52%        | 0.000         | 0.000         | -0.001        |
|          |     |         |         |         | $\langle 58 T^0, b^1, s_{\text{HB}}^1\rangle$   | 1.31%         | 0.000         | 0.000         | -0.004        |
|          |     |         |         |         | $\langle 58 T^0, b^1, s_{\text{HB}}^1\rangle$   | 2.01%         | 0.000         | -0.000        | -0.003        |
| 4798.5   | 0.2 | 0.001   | -0.004  | 0.000   | $\langle 61 T^1, b^1, s_{\text{HB}}^1\rangle$   | 46.31%        | -0.000        | -0.000        | 0.000         |
|          |     |         |         |         | $\langle 61 T^1, b^1, s_{\text{HB}}^1\rangle$   | 27.76%        | -0.000        | 0.001         | -0.000        |
|          |     |         |         |         | $\langle 61 T^0, b^0, s_{\text{HB}}^1\rangle$   | 0.01%         | -0.000        | -0.004        | -0.000        |
|          |     |         |         |         | $\langle 61 T^0, b^1, s_{\text{HB}}^1\rangle$   | 9.48%         | 0.000         | 0.002         | 0.000         |
|          |     |         |         |         | $\langle 61 T^0, b^1, s^0\rangle$               | 0.04%         | 0.001         | -0.002        | -0.000        |
| 4853.0   | 0.1 | 0.001   | -0.003  | -0.000  | $\langle 62 T^1, b^1, s_{\text{HB}}^1\rangle$   | 51.41%        | -0.000        | 0.001         | -0.000        |
|          |     |         |         |         | $\langle 62 T^1, b^1, s_{\text{HB}}^1\rangle$   | 15.81%        | -0.000        | -0.001        | 0.000         |
|          |     |         |         |         | $\langle 62 T^2, b^1, s_{\text{HB}}^1\rangle$   | 12.68%        | 0.000         | 0.000         | 0.000         |
|          |     |         |         |         | $\langle 62 T^0, b^1, s_{\text{HB}}^1\rangle$   | 5.86%         | 0.001         | -0.004        | 0.000         |
|          |     |         |         |         | $\langle 62 T^0, b^0, s_{\text{HB}}^1\rangle$   | 0.00%         | 0.000         | 0.001         | 0.000         |
| 4857.1   | 0.1 | -0.000  | 0.000   | -0.003  | $\langle 63 T^1, b^1, s_{\text{HB}}^1\rangle$   | 44.00%        | -0.000        | -0.000        | 0.001         |
|          |     |         |         |         | $\langle 63 T^1, b^1, s_{\text{HB}}^1\rangle$   | 29.08%        | -0.000        | 0.000         | -0.001        |
|          |     |         |         |         | $\langle 63 T^2, b^1, s_{\text{HB}}^1\rangle$   | 10.56%        | -0.000        | 0.000         | 0.001         |
|          |     |         |         |         | $\langle 63 T^0, b^1, s_{\text{HB}}^1\rangle$   | 4.50%         | 0.000         | 0.000         | -0.007        |
|          |     |         |         |         | $\langle 63 T^0, b^0, s_{\text{HB}}^1\rangle$   | 0.00%         | -0.000        | -0.000        | 0.002         |
| 4880.3   | 0.3 | 0.000   | -0.000  | 0.005   | $\langle 64 T^1, b^1, s_{\text{HB}}^1\rangle$   | 42.33%        | -0.000        | 0.000         | -0.002        |
|          |     |         |         |         | $\langle 64 T^1, b^1, s_{\text{HB}}^1\rangle$   | 15.55%        | 0.000         | 0.000         | -0.001        |
|          |     |         |         |         | $\langle 64 T^0, b^1, s_{\text{HB}}^1\rangle$   | 3.84%         | -0.000        | -0.000        | 0.007         |
|          |     |         |         |         | $\langle 64 T^0, b^1, s_{\text{HB}}^1\rangle$   | 5.91%         | -0.000        | 0.000         | 0.006         |
|          |     |         |         |         | $\langle 64 T^0, b^0, s_{\text{HB}}^1\rangle$   | 0.01%         | 0.000         | 0.000         | -0.005        |
| 4919.8   | 0.1 | -0.000  | -0.000  | 0.003   | $\langle 66 T^0, b^3, s^0\rangle$               | 88.65%        | -0.000        | 0.000         | -0.004        |

|        |     |        |        |        |                                                  |        |        |        |        |
|--------|-----|--------|--------|--------|--------------------------------------------------|--------|--------|--------|--------|
|        |     |        |        |        | $\langle 66 T^0, b^1, s^0\rangle$                | 0.09%  | 0.000  | 0.000  | 0.003  |
|        |     |        |        |        | $\langle 66 T^0, b^1, s_{\text{free}}^1\rangle$  | 6.50%  | -0.000 | 0.000  | 0.002  |
| 4970.7 | 0.4 | 0.002  | -0.005 | 0.000  | $\langle 67 T^0, b^3, s^0\rangle$                | 90.89% | 0.002  | -0.003 | -0.000 |
|        |     |        |        |        | $\langle 67 T^0, b^1, s_{\text{HB}}^1\rangle$    | 2.47%  | 0.001  | -0.003 | 0.000  |
|        |     |        |        |        | $\langle 67 T^0, b^1, s^0\rangle$                | 0.03%  | -0.001 | 0.002  | 0.000  |
| 5005.4 | 0.1 | -0.000 | 0.000  | 0.003  | $\langle 68 T^0, b^3, s^0\rangle$                | 91.56% | 0.000  | 0.000  | 0.002  |
|        |     |        |        |        | $\langle 68 T^0, b^1, s_{\text{HB}}^1\rangle$    | 1.99%  | -0.000 | -0.000 | 0.005  |
|        |     |        |        |        | $\langle 68 T^0, b^1, s_{\text{HB}}^1\rangle$    | 0.64%  | 0.000  | -0.000 | -0.002 |
| 5207.7 | 2.6 | -0.000 | 0.000  | 0.014  | $\langle 82 T^0, b^1, s_{\text{free}}^1\rangle$  | 86.01% | -0.000 | 0.000  | 0.006  |
|        |     |        |        |        | $\langle 82 T^0, b^0, s_{\text{HB}}^1\rangle$    | 0.01%  | -0.000 | -0.000 | 0.006  |
|        |     |        |        |        | $\langle 82 T^0, b^1, s^0\rangle$                | 0.04%  | 0.000  | 0.000  | 0.002  |
| 5216.9 | 0.1 | -0.000 | -0.000 | -0.003 | $\langle 83 T^1, b^3, s^0\rangle$                | 36.31% | 0.000  | 0.000  | 0.000  |
|        |     |        |        |        | $\langle 83 T^2, b^1, s_{\text{HB}}^1\rangle$    | 22.85% | -0.000 | -0.000 | 0.001  |
|        |     |        |        |        | $\langle 83 T^0, b^0, s_{\text{HB}}^1\rangle$    | 0.00%  | 0.000  | 0.000  | -0.002 |
|        |     |        |        |        | $\langle 83 T^1, b^1, s_{\text{HB}}^1\rangle$    | 2.07%  | 0.000  | 0.000  | -0.001 |
|        |     |        |        |        | $\langle 83 T^1, b^0, s^0\rangle$                | 0.00%  | 0.000  | 0.000  | -0.001 |
| 5220.6 | 0.1 | -0.000 | 0.000  | 0.002  | $\langle 85 T^1, b^3, s^0\rangle$                | 37.51% | 0.000  | 0.000  | 0.000  |
|        |     |        |        |        | $\langle 85 T^2, b^1, s_{\text{HB}}^1\rangle$    | 18.10% | 0.000  | -0.000 | 0.000  |
|        |     |        |        |        | $\langle 85 T^2, b^1, s_{\text{HB}}^1\rangle$    | 11.21% | -0.000 | -0.000 | 0.000  |
|        |     |        |        |        | $\langle 85 T^0, b^1, s_{\text{free}}^1\rangle$  | 2.37%  | -0.000 | 0.000  | 0.001  |
|        |     |        |        |        | $\langle 85 T^1, b^1, s_{\text{HB}}^1\rangle$    | 1.21%  | 0.000  | 0.000  | -0.001 |
|        |     |        |        |        | $\langle 85 T^0, b^1, s_{\text{HB}}^1\rangle$    | 0.09%  | -0.000 | 0.000  | 0.001  |
| 5249.8 | 0.6 | -0.002 | 0.006  | -0.000 | $\langle 87 T^1, b^3, s^0\rangle$                | 60.27% | 0.000  | 0.000  | 0.000  |
|        |     |        |        |        | $\langle 87 T^0, b^1, s_{\text{free}}^1\rangle$  | 27.79% | -0.001 | 0.004  | -0.000 |
|        |     |        |        |        | $\langle 87 T^0, b^0, s_{\text{free}}^1\rangle$  | 0.02%  | -0.001 | 0.002  | -0.000 |
|        |     |        |        |        | $\langle 87 T^0, b^0, s_{\text{HB}}^1\rangle$    | 0.00%  | 0.000  | 0.001  | 0.000  |
| 5256.2 | 1.5 | 0.003  | -0.010 | -0.000 | $\langle 88 T^0, b^1, s_{\text{free}}^1\rangle$  | 66.25% | 0.001  | -0.006 | 0.000  |
|        |     |        |        |        | $\langle 88 T^1, b^3, s^0\rangle$                | 24.19% | 0.000  | 0.000  | 0.000  |
|        |     |        |        |        | $\langle 88 T^0, b^0, s_{\text{free}}^1\rangle$  | 0.05%  | 0.002  | -0.004 | 0.000  |
|        |     |        |        |        | $\langle 88 T^0, b^0, s_{\text{HB}}^1\rangle$    | 0.00%  | -0.000 | -0.002 | -0.000 |
| 5493.8 | 0.1 | -0.000 | 0.000  | -0.003 | $\langle 100 T^1, b^1, s_{\text{free}}^1\rangle$ | 53.13% | 0.000  | -0.000 | 0.001  |
|        |     |        |        |        | $\langle 100 T^2, b^3, s^0\rangle$               | 40.35% | 0.000  | 0.000  | 0.000  |
|        |     |        |        |        | $\langle 100 T^0, b^0, s_{\text{HB}}^2\rangle$   | 0.61%  | 0.000  | -0.000 | -0.002 |
|        |     |        |        |        | $\langle 100 T^1, b^0, s^0\rangle$               | 0.00%  | 0.000  | 0.000  | -0.001 |
| 5500.9 | 0.7 | -0.000 | 0.000  | -0.007 | $\langle 101 T^2, b^3, s^0\rangle$               | 52.85% | 0.000  | 0.000  | 0.000  |
|        |     |        |        |        | $\langle 101 T^1, b^1, s_{\text{free}}^1\rangle$ | 37.51% | 0.000  | -0.000 | 0.001  |
|        |     |        |        |        | $\langle 101 T^0, b^0, s_{\text{HB}}^2\rangle$   | 2.73%  | 0.000  | -0.000 | -0.005 |
|        |     |        |        |        | $\langle 101 T^1, b^0, s^0\rangle$               | 0.00%  | 0.000  | 0.000  | -0.002 |
|        |     |        |        |        | $\langle 101 T^0, b^0, s_{\text{HB}}^1\rangle$   | 0.00%  | 0.000  | 0.000  | -0.002 |
| 5501.9 | 4.0 | 0.002  | -0.017 | 0.000  | $\langle 102 T^0, b^0, s_{\text{HB}}^2\rangle$   | 64.90% | 0.002  | -0.012 | -0.000 |
|        |     |        |        |        | $\langle 102 T^1, b^0, s_{\text{HB}}^2\rangle$   | 20.17% | 0.000  | 0.002  | 0.000  |
|        |     |        |        |        | $\langle 102 T^0, b^0, s_{\text{HB}}^1\rangle$   | 0.01%  | -0.000 | -0.003 | -0.000 |
| 5503.0 | 0.1 | 0.000  | -0.002 | -0.000 | $\langle 103 T^1, b^1, s_{\text{free}}^1\rangle$ | 69.30% | 0.000  | -0.001 | 0.000  |
|        |     |        |        |        | $\langle 103 T^2, b^3, s^0\rangle$               | 23.05% | 0.000  | 0.000  | 0.000  |
|        |     |        |        |        | $\langle 103 T^0, b^0, s_{\text{HB}}^2\rangle$   | 0.88%  | 0.000  | -0.001 | -0.000 |

|        |      |        |        |        |                                                  |        |        |        |        |
|--------|------|--------|--------|--------|--------------------------------------------------|--------|--------|--------|--------|
|        |      |        |        |        | $\langle 103 T^0, b^1, s_{\text{free}}^1\rangle$ | 0.63%  | -0.000 | 0.001  | -0.000 |
| 5513.8 | 14.9 | 0.000  | -0.000 | -0.033 | $\langle 105 T^0, b^0, s_{\text{HB}}^2\rangle$   | 58.95% | 0.000  | -0.000 | -0.024 |
|        |      |        |        |        | $\langle 105 T^1, b^0, s_{\text{HB}}^2\rangle$   | 22.46% | -0.000 | 0.000  | 0.005  |
|        |      |        |        |        | $\langle 105 T^1, b^0, s^0\rangle$               | 0.02%  | 0.000  | 0.000  | -0.005 |
|        |      |        |        |        | $\langle 105 T^0, b^0, s_{\text{HB}}^1\rangle$   | 0.01%  | 0.000  | 0.000  | -0.005 |
| 5515.0 | 0.1  | 0.000  | -0.002 | -0.000 | $\langle 106 T^2, b^3, s^0\rangle$               | 89.12% | -0.000 | 0.000  | -0.000 |
|        |      |        |        |        | $\langle 106 T^0, b^0, s_{\text{HB}}^2\rangle$   | 0.99%  | 0.000  | -0.001 | -0.000 |
|        |      |        |        |        | $\langle 106 T^0, b^0, s_{\text{HB}}^1\rangle$   | 0.00%  | -0.000 | -0.000 | -0.000 |
|        |      |        |        |        | $\langle 106 T^1, b^0, s_{\text{HB}}^2\rangle$   | 0.19%  | 0.000  | 0.000  | 0.000  |
| 5522.8 | 0.1  | 0.000  | -0.000 | -0.002 | $\langle 107 T^2, b^3, s^0\rangle$               | 83.74% | 0.000  | 0.000  | 0.000  |
|        |      |        |        |        | $\langle 107 T^0, b^0, s_{\text{HB}}^2\rangle$   | 0.31%  | 0.000  | -0.000 | -0.002 |
|        |      |        |        |        | $\langle 107 T^0, b^0, s_{\text{HB}}^1\rangle$   | 0.00%  | 0.000  | 0.000  | -0.000 |
|        |      |        |        |        | $\langle 107 T^1, b^0, s_{\text{HB}}^2\rangle$   | 0.09%  | -0.000 | 0.000  | 0.000  |
| 5524.5 | 0.2  | 0.000  | -0.000 | -0.004 | $\langle 108 T^2, b^3, s^0\rangle$               | 82.18% | 0.000  | 0.000  | 0.000  |
|        |      |        |        |        | $\langle 108 T^0, b^0, s_{\text{HB}}^2\rangle$   | 1.04%  | 0.000  | -0.000 | -0.003 |
|        |      |        |        |        | $\langle 108 T^1, b^0, s_{\text{HB}}^2\rangle$   | 0.36%  | -0.000 | 0.000  | 0.001  |
|        |      |        |        |        | $\langle 108 T^1, b^0, s^0\rangle$               | 0.00%  | 0.000  | 0.000  | -0.000 |
| 5759.2 | 0.1  | -0.000 | 0.002  | -0.000 | $\langle 115 T^1, b^0, s_{\text{HB}}^2\rangle$   | 47.39% | -0.000 | -0.001 | 0.000  |
|        |      |        |        |        | $\langle 115 T^1, b^0, s_{\text{HB}}^2\rangle$   | 23.09% | 0.000  | 0.002  | 0.000  |
|        |      |        |        |        | $\langle 115 T^1, b^0, s^0\rangle$               | 0.01%  | -0.000 | 0.002  | -0.000 |
|        |      |        |        |        | $\langle 115 T^0, b^0, s_{\text{HB}}^2\rangle$   | 1.60%  | -0.000 | 0.002  | 0.000  |
| 5772.7 | 0.9  | -0.000 | 0.000  | 0.008  | $\langle 117 T^1, b^0, s_{\text{HB}}^2\rangle$   | 48.30% | -0.000 | 0.000  | 0.002  |
|        |      |        |        |        | $\langle 117 T^1, b^0, s_{\text{HB}}^2\rangle$   | 25.01% | -0.000 | 0.000  | 0.006  |
|        |      |        |        |        | $\langle 117 T^0, b^0, s_{\text{HB}}^2\rangle$   | 3.54%  | -0.000 | 0.000  | 0.006  |
|        |      |        |        |        | $\langle 117 T^0, b^0, s_{\text{HB}}^1\rangle$   | 0.01%  | 0.000  | 0.000  | -0.005 |
| 5887.8 | 0.2  | 0.001  | -0.004 | -0.000 | $\langle 118 T^0, b^0, s_{\text{HB}}^2\rangle$   | 26.17% | 0.001  | -0.007 | -0.000 |
|        |      |        |        |        | $\langle 118 T^1, b^0, s_{\text{HB}}^2\rangle$   | 22.27% | -0.000 | -0.001 | 0.000  |
|        |      |        |        |        | $\langle 118 T^1, b^0, s_{\text{HB}}^2\rangle$   | 22.20% | -0.000 | -0.002 | -0.000 |
|        |      |        |        |        | $\langle 118 T^2, b^0, s_{\text{HB}}^2\rangle$   | 13.41% | -0.000 | -0.000 | 0.000  |
|        |      |        |        |        | $\langle 118 T^0, b^0, s_{\text{HB}}^1\rangle$   | 0.02%  | 0.000  | 0.005  | 0.000  |
| 5896.9 | 1.5  | 0.000  | -0.000 | 0.010  | $\langle 119 T^0, b^0, s_{\text{HB}}^2\rangle$   | 28.94% | -0.000 | 0.000  | 0.017  |
|        |      |        |        |        | $\langle 119 T^1, b^0, s_{\text{HB}}^2\rangle$   | 22.73% | 0.000  | -0.000 | -0.001 |
|        |      |        |        |        | $\langle 119 T^1, b^0, s_{\text{HB}}^2\rangle$   | 21.93% | -0.000 | 0.000  | 0.005  |
|        |      |        |        |        | $\langle 119 T^2, b^0, s_{\text{HB}}^2\rangle$   | 12.50% | -0.000 | -0.000 | 0.002  |
|        |      |        |        |        | $\langle 119 T^2, b^0, s_{\text{HB}}^2\rangle$   | 10.77% | -0.000 | -0.000 | 0.002  |
|        |      |        |        |        | $\langle 119 T^0, b^0, s_{\text{HB}}^1\rangle$   | 0.04%  | 0.000  | 0.000  | -0.013 |
| 6001.7 | 0.3  | -0.001 | -0.004 | -0.000 | $\langle 120 T^0, b^0, s_{\text{HB}}^2\rangle$   | 78.45% | -0.001 | -0.007 | 0.000  |
|        |      |        |        |        | $\langle 120 T^0, b^0, s_{\text{HB}}^1\rangle$   | 0.02%  | 0.000  | 0.005  | 0.000  |
|        |      |        |        |        | $\langle 120 T^0, b^0, s_{\text{HB}}^2\rangle$   | 0.99%  | 0.000  | -0.001 | -0.000 |
| 6122.5 | 0.3  | -0.000 | 0.000  | -0.005 | $\langle 123 T^0, b^2, s_{\text{HB}}^1\rangle$   | 50.12% | -0.000 | -0.000 | 0.009  |
|        |      |        |        |        | $\langle 123 T^0, b^2, s_{\text{HB}}^1\rangle$   | 24.80% | -0.000 | -0.000 | 0.005  |
|        |      |        |        |        | $\langle 123 T^0, b^0, s_{\text{HB}}^1\rangle$   | 0.08%  | 0.000  | 0.000  | -0.017 |
| 6137.1 | 0.1  | -0.001 | 0.002  | 0.000  | $\langle 124 T^0, b^2, s_{\text{HB}}^1\rangle$   | 64.55% | -0.000 | 0.000  | -0.000 |
|        |      |        |        |        | $\langle 124 T^0, b^2, s_{\text{HB}}^1\rangle$   | 12.11% | 0.000  | -0.002 | -0.000 |
|        |      |        |        |        | $\langle 124 T^0, b^0, s_{\text{HB}}^1\rangle$   | 0.03%  | 0.000  | 0.005  | 0.000  |

|        |     |        |       |        |                                                                  |        |        |        |        |
|--------|-----|--------|-------|--------|------------------------------------------------------------------|--------|--------|--------|--------|
|        |     |        |       |        | $\langle 124 T^0, b^0, s_{\text{HB}}^2\rangle$                   | 0.51%  | -0.000 | 0.001  | 0.000  |
| 6149.4 | 0.1 | 0.000  | 0.000 | -0.003 | $\langle 125 T^0, b^2, s_{\text{HB}}^1\rangle$                   | 53.66% | -0.000 | -0.000 | 0.008  |
|        |     |        |       |        | $\langle 125 T^0, b^2, s_{\text{HB}}^1\rangle$                   | 29.26% | 0.000  | 0.000  | -0.007 |
|        |     |        |       |        | $\langle 125 T^0, b^0, s_{\text{HB}}^2\rangle$                   | 0.15%  | 0.000  | -0.000 | -0.001 |
| 6557.8 | 0.4 | -0.004 | 0.004 | -0.000 | $\langle 150 T^0, b^0, s_{\text{HB}}^1 s_{\text{free}}^1\rangle$ | 77.14% | -0.005 | 0.003  | -0.000 |
|        |     |        |       |        | $\langle 150 T^1, b^0, s_{\text{HB}}^1 s_{\text{free}}^1\rangle$ | 12.30% | 0.000  | -0.000 | 0.000  |
|        |     |        |       |        | $\langle 150 T^0, b^0, s_{\text{HB}}^1\rangle$                   | 0.00%  | 0.000  | 0.002  | 0.000  |
|        |     |        |       |        | $\langle 150 T^0, b^0, s_{\text{free}}^1\rangle$                 | 0.00%  | 0.001  | -0.001 | 0.000  |
| 6763.1 | 0.1 | -0.001 | 0.001 | -0.000 | $\langle 167 T^1, b^0, s_{\text{HB}}^1 s_{\text{free}}^1\rangle$ | 66.87% | -0.000 | 0.001  | -0.000 |
|        |     |        |       |        | $\langle 167 T^0, b^0, s_{\text{free}}^1\rangle$                 | 0.02%  | 0.001  | -0.002 | 0.000  |
|        |     |        |       |        | $\langle 167 T^0, b^0, s_{\text{HB}}^1 s_{\text{free}}^1\rangle$ | 9.37%  | -0.002 | 0.001  | -0.000 |
| 6819.9 | 0.1 | -0.001 | 0.002 | -0.000 | $\langle 174 T^0, b^2, s_{\text{free}}^1\rangle$                 | 56.31% | -0.002 | 0.004  | -0.000 |
|        |     |        |       |        | $\langle 174 T^1, b^0, s_{\text{HB}}^1 s_{\text{free}}^1\rangle$ | 21.47% | 0.000  | 0.000  | -0.000 |
|        |     |        |       |        | $\langle 174 T^0, b^4, s^0\rangle$                               | 10.52% | 0.000  | 0.000  | 0.000  |
|        |     |        |       |        | $\langle 174 T^0, b^0, s_{\text{free}}^1\rangle$                 | 0.05%  | 0.002  | -0.004 | 0.000  |
|        |     |        |       |        | $\langle 174 T^0, b^0, s_{\text{free}}^2\rangle$                 | 3.52%  | -0.001 | 0.003  | -0.000 |

| $\omega$ | $I$ | $\mu_x$ | $\mu_y$ | $\mu_z$ | Assignment                         | $ c_{ijk}^2 $ | $\mu_x^{ijk}$ | $\mu_y^{ijk}$ | $\mu_z^{ijk}$ |
|----------|-----|---------|---------|---------|------------------------------------|---------------|---------------|---------------|---------------|
| 4716.3   | 4.8 | -0.000  | -0.020  | -0.000  | $\langle 91 T^0, b^1, s^1\rangle$  | 40.03%        | -0.001        | -0.011        | -0.001        |
|          |     |         |         |         | $\langle 91 T^0, b^1, s^1\rangle$  | 36.54%        | -0.001        | -0.011        | 0.001         |
|          |     |         |         |         | $\langle 91 T^0, b^1, s^1\rangle$  | 10.67%        | -0.001        | 0.003         | 0.000         |
| 4719.9   | 4.5 | 0.020   | -0.000  | -0.000  | $\langle 92 T^0, b^1, s^1\rangle$  | 44.24%        | 0.012         | -0.001        | -0.000        |
|          |     |         |         |         | $\langle 92 T^0, b^1, s^1\rangle$  | 33.58%        | 0.009         | -0.001        | 0.000         |
|          |     |         |         |         | $\langle 92 T^0, b^1, s^1\rangle$  | 8.31%         | -0.004        | -0.000        | -0.000        |
| 4746.6   | 0.1 | -0.000  | 0.000   | 0.003   | $\langle 93 T^0, b^1, s^1\rangle$  | 45.75%        | 0.001         | 0.013         | -0.001        |
|          |     |         |         |         | $\langle 93 T^0, b^1, s^1\rangle$  | 40.16%        | -0.001        | -0.011        | -0.001        |
|          |     |         |         |         | $\langle 93 T^0, b^0, s^1\rangle$  | 0.11%         | -0.000        | 0.002         | 0.004         |
| 4792.9   | 0.2 | -0.000  | -0.004  | 0.000   | $\langle 94 T^0, b^1, s^1\rangle$  | 71.68%        | 0.001         | -0.009        | -0.000        |
|          |     |         |         |         | $\langle 94 T^0, b^0, s^1\rangle$  | 0.05%         | 0.000         | 0.012         | -0.000        |
|          |     |         |         |         | $\langle 94 T^0, b^1, s^1\rangle$  | 7.52%         | -0.001        | -0.005        | -0.000        |
| 4799.3   | 0.5 | -0.007  | 0.000   | -0.000  | $\langle 95 T^0, b^1, s^1\rangle$  | 74.70%        | -0.013        | -0.001        | -0.000        |
|          |     |         |         |         | $\langle 95 T^0, b^0, s^1\rangle$  | 0.05%         | 0.012         | -0.000        | 0.000         |
|          |     |         |         |         | $\langle 95 T^0, b^1, s^1\rangle$  | 7.18%         | -0.005        | 0.000         | 0.000         |
| 4936.0   | 0.1 | 0.000   | -0.003  | -0.000  | $\langle 96 T^1, b^1, s^1\rangle$  | 48.03%        | 0.000         | 0.002         | 0.000         |
|          |     |         |         |         | $\langle 96 T^1, b^1, s^1\rangle$  | 20.19%        | 0.001         | 0.000         | -0.000        |
|          |     |         |         |         | $\langle 96 T^0, b^0, s^1\rangle$  | 0.01%         | -0.000        | -0.005        | 0.000         |
|          |     |         |         |         | $\langle 96 T^0, b^1, s^1\rangle$  | 0.52%         | -0.000        | -0.001        | 0.000         |
| 4937.7   | 0.1 | -0.003  | -0.000  | 0.000   | $\langle 97 T^1, b^1, s^1\rangle$  | 38.02%        | 0.002         | -0.000        | 0.000         |
|          |     |         |         |         | $\langle 97 T^1, b^1, s^1\rangle$  | 27.92%        | 0.000         | -0.001        | 0.000         |
|          |     |         |         |         | $\langle 97 T^0, b^0, s^1\rangle$  | 0.01%         | -0.005        | 0.000         | -0.000        |
|          |     |         |         |         | $\langle 97 T^0, b^1, s^1\rangle$  | 1.22%         | -0.002        | 0.000         | -0.000        |
| 4997.4   | 0.2 | -0.004  | -0.000  | -0.000  | $\langle 102 T^1, b^1, s^1\rangle$ | 35.30%        | -0.001        | -0.001        | 0.000         |
|          |     |         |         |         | $\langle 102 T^1, b^1, s^1\rangle$ | 21.27%        | 0.001         | 0.000         | -0.000        |
|          |     |         |         |         | $\langle 102 T^0, b^1, s^1\rangle$ | 1.49%         | -0.002        | 0.000         | 0.000         |
|          |     |         |         |         | $\langle 102 T^0, b^1, s^1\rangle$ | 0.95%         | -0.001        | -0.000        | -0.000        |
|          |     |         |         |         | $\langle 102 T^0, b^1, s^1\rangle$ | 0.54%         | -0.001        | 0.000         | -0.000        |
| 4998.5   | 0.1 | 0.002   | 0.000   | -0.000  | $\langle 103 T^1, b^1, s^1\rangle$ | 38.79%        | -0.001        | 0.000         | -0.000        |
|          |     |         |         |         | $\langle 103 T^1, b^1, s^1\rangle$ | 33.24%        | 0.001         | -0.000        | -0.000        |
|          |     |         |         |         | $\langle 103 T^0, b^1, s^1\rangle$ | 1.17%         | 0.002         | -0.000        | 0.000         |
| 4998.6   | 0.3 | 0.000   | -0.005  | 0.000   | $\langle 104 T^1, b^1, s^1\rangle$ | 32.51%        | -0.000        | 0.001         | -0.000        |
|          |     |         |         |         | $\langle 104 T^1, b^1, s^1\rangle$ | 30.95%        | 0.001         | -0.001        | 0.000         |
|          |     |         |         |         | $\langle 104 T^0, b^1, s^1\rangle$ | 1.98%         | -0.000        | -0.003        | 0.000         |
|          |     |         |         |         | $\langle 104 T^0, b^1, s^1\rangle$ | 1.20%         | -0.000        | -0.002        | -0.000        |
| 5017.2   | 0.3 | -0.005  | -0.000  | -0.000  | $\langle 105 T^0, b^3, s^0\rangle$ | 67.81%        | -0.004        | -0.000        | -0.000        |
|          |     |         |         |         | $\langle 105 T^0, b^1, s^1\rangle$ | 9.32%         | 0.004         | 0.000         | 0.000         |
|          |     |         |         |         | $\langle 105 T^0, b^0, s^1\rangle$ | 0.00%         | -0.002        | 0.000         | -0.000        |
| 5018.8   | 0.3 | -0.000  | 0.005   | 0.000   | $\langle 106 T^0, b^3, s^0\rangle$ | 66.66%        | -0.000        | 0.004         | 0.000         |
|          |     |         |         |         | $\langle 106 T^0, b^1, s^1\rangle$ | 11.37%        | 0.001         | -0.003        | -0.000        |

|        |     |        |        |        |                                    |        |        |        |        |
|--------|-----|--------|--------|--------|------------------------------------|--------|--------|--------|--------|
|        |     |        |        |        | $\langle 106 T^0, b^0, s^1\rangle$ | 0.00%  | 0.000  | 0.002  | -0.000 |
| 5045.1 | 0.1 | -0.003 | -0.000 | 0.000  | $\langle 111 T^1, b^1, s^1\rangle$ | 45.47% | -0.000 | -0.000 | -0.000 |
|        |     |        |        |        | $\langle 111 T^0, b^3, s^0\rangle$ | 18.77% | 0.000  | 0.000  | 0.000  |
|        |     |        |        |        | $\langle 111 T^0, b^1, s^1\rangle$ | 3.69%  | -0.003 | 0.000  | 0.000  |
|        |     |        |        |        | $\langle 111 T^0, b^1, s^1\rangle$ | 0.26%  | 0.001  | -0.000 | 0.000  |
|        |     |        |        |        | $\langle 111 T^1, b^0, s^1\rangle$ | 0.03%  | -0.000 | -0.000 | 0.000  |
| 5045.4 | 0.3 | 0.000  | -0.004 | -0.000 | $\langle 112 T^1, b^1, s^1\rangle$ | 33.28% | 0.000  | -0.000 | -0.000 |
|        |     |        |        |        | $\langle 112 T^1, b^1, s^1\rangle$ | 27.38% | 0.000  | 0.000  | 0.000  |
|        |     |        |        |        | $\langle 112 T^0, b^1, s^1\rangle$ | 2.46%  | -0.000 | -0.003 | 0.000  |
|        |     |        |        |        | $\langle 112 T^0, b^1, s^1\rangle$ | 0.41%  | -0.000 | -0.001 | -0.000 |
|        |     |        |        |        | $\langle 112 T^1, b^0, s^1\rangle$ | 0.02%  | 0.000  | -0.000 | 0.000  |
| 5049.7 | 0.1 | -0.003 | -0.000 | 0.000  | $\langle 113 T^1, b^1, s^1\rangle$ | 61.08% | -0.000 | 0.000  | 0.000  |
|        |     |        |        |        | $\langle 113 T^0, b^1, s^1\rangle$ | 1.10%  | -0.002 | 0.000  | -0.000 |
|        |     |        |        |        | $\langle 113 T^0, b^1, s^1\rangle$ | 0.87%  | -0.001 | -0.000 | -0.000 |
|        |     |        |        |        | $\langle 113 T^0, b^1, s^1\rangle$ | 0.32%  | -0.001 | 0.000  | 0.000  |
| 5892.0 | 2.3 | 0.000  | -0.012 | 0.002  | $\langle 190 T^0, b^0, s^2\rangle$ | 72.44% | 0.000  | -0.009 | 0.001  |
|        |     |        |        |        | $\langle 190 T^1, b^0, s^2\rangle$ | 11.05% | 0.001  | 0.002  | -0.000 |
|        |     |        |        |        | $\langle 190 T^1, b^0, s^0\rangle$ | 0.00%  | -0.001 | -0.002 | 0.000  |
| 5910.5 | 4.4 | -0.000 | -0.017 | -0.001 | $\langle 191 T^0, b^0, s^2\rangle$ | 71.22% | -0.000 | -0.016 | -0.001 |
|        |     |        |        |        | $\langle 191 T^1, b^0, s^2\rangle$ | 11.96% | -0.000 | 0.001  | 0.000  |
|        |     |        |        |        | $\langle 191 T^1, b^0, s^0\rangle$ | 0.01%  | -0.001 | -0.003 | 0.000  |
|        |     |        |        |        | $\langle 191 T^1, b^0, s^2\rangle$ | 6.06%  | 0.001  | 0.002  | -0.000 |
| 5917.6 | 6.2 | 0.020  | -0.000 | -0.000 | $\langle 192 T^0, b^0, s^2\rangle$ | 71.02% | 0.018  | -0.000 | -0.000 |
|        |     |        |        |        | $\langle 192 T^1, b^0, s^2\rangle$ | 11.92% | -0.002 | 0.000  | 0.000  |
|        |     |        |        |        | $\langle 192 T^1, b^0, s^0\rangle$ | 0.01%  | 0.004  | -0.001 | 0.000  |
| 6194.2 | 0.2 | -0.000 | 0.004  | 0.000  | $\langle 196 T^1, b^0, s^2\rangle$ | 27.24% | 0.000  | 0.000  | 0.000  |
|        |     |        |        |        | $\langle 196 T^1, b^0, s^2\rangle$ | 20.04% | 0.001  | 0.003  | -0.000 |
|        |     |        |        |        | $\langle 196 T^0, b^0, s^2\rangle$ | 10.85% | -0.000 | 0.004  | -0.000 |
|        |     |        |        |        | $\langle 196 T^0, b^0, s^1\rangle$ | 0.01%  | -0.000 | -0.006 | 0.000  |
| 6209.9 | 0.1 | 0.000  | 0.003  | -0.000 | $\langle 197 T^1, b^0, s^2\rangle$ | 19.90% | 0.000  | 0.000  | 0.000  |
|        |     |        |        |        | $\langle 197 T^1, b^0, s^2\rangle$ | 18.75% | -0.000 | 0.001  | 0.000  |
|        |     |        |        |        | $\langle 197 T^0, b^0, s^2\rangle$ | 11.93% | 0.000  | 0.007  | 0.000  |
|        |     |        |        |        | $\langle 197 T^0, b^0, s^1\rangle$ | 0.01%  | -0.000 | -0.005 | 0.000  |
|        |     |        |        |        | $\langle 197 T^1, b^0, s^2\rangle$ | 5.38%  | 0.000  | 0.002  | -0.000 |
| 6210.5 | 0.1 | -0.003 | 0.000  | -0.000 | $\langle 198 T^0, b^0, s^2\rangle$ | 21.63% | 0.004  | -0.000 | 0.000  |
|        |     |        |        |        | $\langle 198 T^1, b^0, s^2\rangle$ | 14.68% | -0.002 | 0.000  | 0.000  |
|        |     |        |        |        | $\langle 198 T^1, b^0, s^2\rangle$ | 13.03% | -0.001 | 0.000  | -0.000 |
|        |     |        |        |        | $\langle 198 T^0, b^0, s^2\rangle$ | 12.13% | -0.008 | 0.000  | 0.000  |
|        |     |        |        |        | $\langle 198 T^0, b^0, s^1\rangle$ | 0.01%  | 0.006  | -0.000 | 0.000  |
| 6230.1 | 0.5 | -0.006 | 0.000  | -0.000 | $\langle 199 T^0, b^0, s^2\rangle$ | 51.99% | -0.007 | 0.000  | -0.000 |
|        |     |        |        |        | $\langle 199 T^1, b^0, s^2\rangle$ | 12.89% | -0.001 | 0.000  | -0.000 |
|        |     |        |        |        | $\langle 199 T^0, b^0, s^1\rangle$ | 0.03%  | 0.009  | -0.000 | 0.000  |
|        |     |        |        |        | $\langle 199 T^0, b^0, s^2\rangle$ | 3.43%  | -0.004 | 0.000  | 0.000  |
| 6242.1 | 0.2 | 0.000  | 0.004  | 0.000  | $\langle 201 T^0, b^0, s^2\rangle$ | 55.86% | 0.000  | 0.007  | -0.000 |
|        |     |        |        |        | $\langle 201 T^1, b^0, s^2\rangle$ | 16.48% | 0.000  | 0.001  | -0.000 |



|        |     |        |        |        |                                    |        |        |        |        |
|--------|-----|--------|--------|--------|------------------------------------|--------|--------|--------|--------|
|        |     |        |        |        | $\langle 201 T^0, b^0, s^1\rangle$ | 0.01%  | -0.000 | -0.005 | 0.000  |
|        |     |        |        |        | $\langle 201 T^0, b^2, s^1\rangle$ | 1.14%  | 0.000  | 0.002  | -0.000 |
| 6253.3 | 0.2 | 0.000  | 0.004  | -0.001 | $\langle 202 T^1, b^0, s^2\rangle$ | 37.31% | -0.000 | -0.001 | 0.000  |
|        |     |        |        |        | $\langle 202 T^0, b^0, s^2\rangle$ | 14.70% | 0.000  | 0.004  | -0.000 |
|        |     |        |        |        | $\langle 202 T^1, b^0, s^2\rangle$ | 11.18% | -0.000 | 0.001  | 0.000  |
|        |     |        |        |        | $\langle 202 T^0, b^0, s^1\rangle$ | 0.03%  | -0.000 | -0.009 | 0.000  |
|        |     |        |        |        | $\langle 202 T^0, b^0, s^2\rangle$ | 8.87%  | 0.000  | 0.006  | 0.000  |
| 6258.1 | 0.1 | 0.003  | -0.000 | 0.000  | $\langle 203 T^1, b^0, s^2\rangle$ | 54.62% | -0.001 | 0.000  | -0.000 |
|        |     |        |        |        | $\langle 203 T^0, b^0, s^1\rangle$ | 0.02%  | -0.009 | 0.000  | -0.000 |
|        |     |        |        |        | $\langle 203 T^0, b^0, s^2\rangle$ | 8.59%  | 0.006  | -0.000 | -0.000 |
|        |     |        |        |        | $\langle 203 T^0, b^2, s^1\rangle$ | 1.69%  | 0.002  | -0.000 | 0.000  |
| 6298.2 | 0.2 | 0.000  | -0.003 | -0.002 | $\langle 204 T^0, b^0, s^2\rangle$ | 63.25% | 0.000  | -0.001 | -0.004 |
|        |     |        |        |        | $\langle 204 T^0, b^0, s^1\rangle$ | 0.01%  | -0.000 | -0.006 | 0.000  |
|        |     |        |        |        | $\langle 204 T^0, b^2, s^1\rangle$ | 7.67%  | 0.000  | 0.004  | -0.000 |
| 6303.2 | 0.4 | -0.000 | -0.005 | 0.001  | $\langle 205 T^0, b^2, s^1\rangle$ | 43.17% | 0.000  | 0.009  | -0.000 |
|        |     |        |        |        | $\langle 205 T^0, b^2, s^1\rangle$ | 12.59% | 0.000  | 0.000  | -0.000 |
|        |     |        |        |        | $\langle 205 T^0, b^2, s^1\rangle$ | 12.03% | 0.000  | 0.000  | 0.000  |
|        |     |        |        |        | $\langle 205 T^0, b^0, s^2\rangle$ | 10.42% | -0.000 | 0.000  | 0.002  |
|        |     |        |        |        | $\langle 205 T^0, b^0, s^1\rangle$ | 0.05%  | -0.000 | -0.012 | 0.000  |
|        |     |        |        |        | $\langle 205 T^0, b^0, s^2\rangle$ | 1.19%  | -0.000 | -0.002 | -0.000 |
| 6306.3 | 0.5 | -0.006 | -0.000 | 0.000  | $\langle 206 T^0, b^2, s^1\rangle$ | 50.29% | 0.010  | -0.000 | 0.000  |
|        |     |        |        |        | $\langle 206 T^0, b^2, s^1\rangle$ | 17.35% | 0.000  | 0.000  | 0.000  |
|        |     |        |        |        | $\langle 206 T^0, b^0, s^1\rangle$ | 0.05%  | -0.013 | 0.000  | -0.000 |
|        |     |        |        |        | $\langle 206 T^0, b^0, s^2\rangle$ | 2.45%  | -0.003 | 0.000  | 0.000  |

| $\omega$ | $I$ | $\mu_x$ | $\mu_y$ | $\mu_z$ | Assignment                                      | $ c_{ijk}^2 $ | $\mu_x^{ijk}$ | $\mu_y^{ijk}$ | $\mu_z^{ijk}$ |
|----------|-----|---------|---------|---------|-------------------------------------------------|---------------|---------------|---------------|---------------|
| 4028.7   | 0.3 | -0.000  | 0.000   | -0.005  | $\langle 29 T^0, b^1, s_{\text{HB}}^1\rangle$   | 34.22%        | 0.000         | 0.000         | -0.002        |
|          |     |         |         |         | $\langle 29 T^2, b^1, s_{\text{HB}}^1\rangle$   | 27.21%        | -0.000        | -0.000        | 0.001         |
|          |     |         |         |         | $\langle 29 T^1, b^1, s_{\text{HB}}^1\rangle$   | 25.99%        | -0.000        | -0.000        | 0.001         |
|          |     |         |         |         | $\langle 29 T^0, b^0, s_{\text{free}}^1\rangle$ | 0.26%         | 0.000         | 0.000         | -0.010        |
|          |     |         |         |         | $\langle 29 T^1, b^0, s_{\text{free}}^1\rangle$ | 1.56%         | 0.000         | 0.000         | 0.008         |
| 4422.5   | 8.4 | 0.002   | 0.027   | -0.000  | $\langle 32 T^0, b^0, s_{\text{HB}}^2\rangle$   | 31.25%        | 0.003         | 0.046         | -0.000        |
|          |     |         |         |         | $\langle 32 T^2, b^0, s_{\text{HB}}^2\rangle$   | 27.53%        | 0.000         | 0.003         | 0.000         |
|          |     |         |         |         | $\langle 32 T^1, b^0, s_{\text{HB}}^2\rangle$   | 23.06%        | -0.001        | -0.010        | 0.000         |
|          |     |         |         |         | $\langle 32 T^0, b^0, s_{\text{HB}}^1\rangle$   | 0.28%         | -0.001        | -0.038        | 0.000         |
|          |     |         |         |         | $\langle 32 T^0, b^1, s_{\text{HB}}^1\rangle$   | 3.48%         | 0.001         | 0.022         | -0.000        |
| 4679.2   | 0.1 | -0.000  | 0.002   | 0.000   | $\langle 34 T^2, b^1, s_{\text{HB}}^1\rangle$   | 55.36%        | -0.000        | -0.017        | -0.000        |
|          |     |         |         |         | $\langle 34 T^1, b^1, s_{\text{HB}}^1\rangle$   | 27.20%        | 0.000         | 0.028         | 0.000         |
|          |     |         |         |         | $\langle 34 T^1, b^0, s_{\text{HB}}^1\rangle$   | 0.95%         | -0.001        | -0.030        | 0.000         |
|          |     |         |         |         | $\langle 34 T^0, b^1, s_{\text{HB}}^1\rangle$   | 2.57%         | -0.000        | -0.019        | 0.000         |
| 4691.5   | 0.2 | 0.000   | -0.004  | -0.000  | $\langle 35 T^0, b^3, s^0\rangle$               | 45.88%        | 0.001         | -0.002        | 0.000         |
|          |     |         |         |         | $\langle 35 T^1, b^3, s^0\rangle$               | 13.20%        | 0.000         | 0.000         | 0.000         |
|          |     |         |         |         | $\langle 35 T^0, b^1, s_{\text{HB}}^1\rangle$   | 2.95%         | 0.001         | 0.020         | -0.000        |
|          |     |         |         |         | $\langle 35 T^1, b^1, s_{\text{HB}}^1\rangle$   | 4.09%         | 0.000         | 0.011         | 0.000         |
|          |     |         |         |         | $\langle 35 T^0, b^2, s_{\text{HB}}^1\rangle$   | 5.56%         | -0.000        | -0.008        | -0.000        |
| 4748.2   | 0.1 | 0.000   | -0.000  | -0.003  | $\langle 36 T^0, b^3, s^0\rangle$               | 41.92%        | 0.000         | -0.000        | 0.002         |
|          |     |         |         |         | $\langle 36 T^1, b^3, s^0\rangle$               | 13.15%        | 0.000         | -0.000        | 0.000         |
|          |     |         |         |         | $\langle 36 T^0, b^0, s_{\text{free}}^1\rangle$ | 0.02%         | 0.000         | 0.000         | -0.003        |
|          |     |         |         |         | $\langle 36 T^0, b^1, s^0\rangle$               | 0.04%         | -0.000        | 0.000         | -0.002        |
| 4904.3   | 0.1 | -0.000  | 0.000   | -0.003  | $\langle 38 T^0, b^3, s^0\rangle$               | 76.17%        | 0.000         | 0.000         | -0.003        |
|          |     |         |         |         | $\langle 38 T^1, b^3, s^0\rangle$               | 15.43%        | -0.000        | -0.000        | -0.001        |
|          |     |         |         |         | $\langle 38 T^0, b^1, s^0\rangle$               | 0.03%         | 0.000         | -0.000        | 0.002         |
|          |     |         |         |         | $\langle 38 T^0, b^0, s_{\text{free}}^1\rangle$ | 0.00%         | 0.000         | 0.000         | -0.001        |
| 4930.6   | 0.2 | -0.001  | 0.004   | -0.000  | $\langle 39 T^0, b^3, s^0\rangle$               | 29.38%        | 0.001         | -0.001        | 0.000         |
|          |     |         |         |         | $\langle 39 T^0, b^2, s_{\text{HB}}^1\rangle$   | 19.61%        | 0.000         | 0.014         | 0.000         |
|          |     |         |         |         | $\langle 39 T^0, b^1, s_{\text{HB}}^1\rangle$   | 2.11%         | -0.000        | -0.017        | 0.000         |
|          |     |         |         |         | $\langle 39 T^0, b^0, s_{\text{HB}}^2\rangle$   | 1.45%         | 0.001         | 0.010         | -0.000        |
| 5022.3   | 0.7 | -0.001  | -0.008  | -0.000  | $\langle 41 T^0, b^2, s_{\text{HB}}^1\rangle$   | 32.34%        | 0.000         | 0.007         | -0.000        |
|          |     |         |         |         | $\langle 41 T^0, b^3, s^0\rangle$               | 30.32%        | 0.000         | 0.000         | 0.000         |
|          |     |         |         |         | $\langle 41 T^1, b^2, s_{\text{HB}}^1\rangle$   | 20.12%        | 0.000         | 0.003         | -0.000        |
|          |     |         |         |         | $\langle 41 T^0, b^0, s_{\text{HB}}^1\rangle$   | 0.02%         | -0.000        | -0.010        | 0.000         |
|          |     |         |         |         | $\langle 41 T^1, b^0, s_{\text{HB}}^1\rangle$   | 0.03%         | -0.000        | -0.005        | 0.000         |
| 5123.6   | 1.4 | -0.002  | -0.010  | -0.000  | $\langle 43 T^0, b^1, s_{\text{free}}^1\rangle$ | 72.09%        | -0.004        | -0.010        | 0.000         |
|          |     |         |         |         | $\langle 43 T^0, b^0, s_{\text{free}}^1\rangle$ | 0.34%         | 0.004         | 0.007         | -0.000        |
|          |     |         |         |         | $\langle 43 T^0, b^1, s_{\text{HB}}^1\rangle$   | 0.19%         | 0.000         | 0.005         | -0.000        |
| 5152.4   | 0.5 | -0.000  | -0.000  | 0.006   | $\langle 44 T^1, b^3, s^0\rangle$               | 43.45%        | -0.000        | 0.000         | -0.001        |

|        |     |        |        |        |                                                                 |        |        |        |        |
|--------|-----|--------|--------|--------|-----------------------------------------------------------------|--------|--------|--------|--------|
|        |     |        |        |        | $\langle 44 T^0, b^3, s^0\rangle$                               | 15.54% | 0.000  | -0.000 | 0.001  |
|        |     |        |        |        | $\langle 44 T^2, b^3, s^0\rangle$                               | 11.67% | 0.000  | 0.000  | 0.000  |
|        |     |        |        |        | $\langle 44 T^0, b^0, s_{\text{free}}^1\rangle$                 | 0.08%  | -0.000 | -0.000 | 0.006  |
|        |     |        |        |        | $\langle 44 T^1, b^0, s_{\text{free}}^1\rangle$                 | 0.08%  | 0.000  | 0.000  | 0.002  |
| 5162.0 | 3.6 | -0.000 | -0.000 | 0.017  | $\langle 45 T^0, b^1, s_{\text{free}}^1\rangle$                 | 67.52% | 0.000  | -0.000 | -0.001 |
|        |     |        |        |        | $\langle 45 T^1, b^3, s^0\rangle$                               | 12.93% | 0.000  | -0.000 | 0.000  |
|        |     |        |        |        | $\langle 45 T^0, b^0, s_{\text{free}}^1\rangle$                 | 0.61%  | -0.000 | -0.000 | 0.016  |
|        |     |        |        |        | $\langle 45 T^1, b^0, s_{\text{free}}^1\rangle$                 | 0.07%  | 0.000  | 0.000  | 0.002  |
| 5183.2 | 0.9 | 0.000  | 0.000  | -0.008 | $\langle 46 T^0, b^1, s_{\text{free}}^1\rangle$                 | 81.75% | 0.000  | 0.000  | -0.006 |
|        |     |        |        |        | $\langle 46 T^0, b^0, s_{\text{free}}^1\rangle$                 | 0.02%  | 0.000  | 0.000  | -0.003 |
|        |     |        |        |        | $\langle 46 T^0, b^1, s^0\rangle$                               | 0.01%  | 0.000  | -0.000 | 0.001  |
| 5206.4 | 0.2 | -0.000 | -0.003 | -0.000 | $\langle 47 T^1, b^3, s^0\rangle$                               | 57.80% | 0.000  | 0.000  | 0.000  |
|        |     |        |        |        | $\langle 47 T^2, b^3, s^0\rangle$                               | 14.30% | 0.000  | 0.000  | 0.000  |
|        |     |        |        |        | $\langle 47 T^0, b^3, s^0\rangle$                               | 13.59% | 0.000  | 0.000  | 0.000  |
|        |     |        |        |        | $\langle 47 T^0, b^0, s_{\text{HB}}^1\rangle$                   | 0.00%  | -0.000 | -0.005 | 0.000  |
|        |     |        |        |        | $\langle 47 T^0, b^2, s_{\text{HB}}^1\rangle$                   | 4.13%  | 0.000  | 0.003  | -0.000 |
|        |     |        |        |        | $\langle 47 T^1, b^0, s_{\text{HB}}^1\rangle$                   | 0.00%  | -0.000 | -0.001 | 0.000  |
| 5250.0 | 2.4 | -0.002 | -0.013 | -0.000 | $\langle 49 T^0, b^1, s_{\text{free}}^1\rangle$                 | 75.69% | -0.001 | -0.010 | 0.000  |
|        |     |        |        |        | $\langle 49 T^0, b^0, s_{\text{HB}}^1\rangle$                   | 0.01%  | -0.000 | -0.007 | 0.000  |
|        |     |        |        |        | $\langle 49 T^1, b^0, s_{\text{HB}}^1\rangle$                   | 0.03%  | 0.000  | 0.005  | -0.000 |
| 5255.9 | 0.3 | -0.001 | -0.005 | -0.000 | $\langle 50 T^2, b^0, s_{\text{HB}}^2\rangle$                   | 47.49% | 0.000  | 0.004  | 0.000  |
|        |     |        |        |        | $\langle 50 T^1, b^0, s_{\text{HB}}^2\rangle$                   | 29.41% | 0.001  | 0.011  | -0.000 |
|        |     |        |        |        | $\langle 50 T^1, b^0, s_{\text{HB}}^1\rangle$                   | 0.23%  | -0.000 | -0.015 | 0.000  |
|        |     |        |        |        | $\langle 50 T^0, b^0, s_{\text{HB}}^2\rangle$                   | 3.07%  | -0.001 | -0.015 | 0.000  |
|        |     |        |        |        | $\langle 50 T^0, b^0, s_{\text{HB}}^1\rangle$                   | 0.03%  | 0.000  | 0.013  | -0.000 |
| 5392.4 | 0.3 | -0.002 | -0.004 | 0.000  | $\langle 52 T^1, b^1, s_{\text{free}}^1\rangle$                 | 44.10% | 0.001  | 0.002  | 0.000  |
|        |     |        |        |        | $\langle 52 T^0, b^1, s_{\text{free}}^1\rangle$                 | 11.36% | -0.002 | -0.004 | 0.000  |
|        |     |        |        |        | $\langle 52 T^0, b^0, s_{\text{HB}}^1 s_{\text{free}}^1\rangle$ | 11.10% | -0.001 | 0.002  | 0.000  |
|        |     |        |        |        | $\langle 52 T^0, b^1, s_{\text{HB}}^1\rangle$                   | 0.39%  | -0.000 | -0.007 | 0.000  |
|        |     |        |        |        | $\langle 52 T^0, b^2, s_{\text{HB}}^1\rangle$                   | 4.46%  | 0.000  | 0.007  | 0.000  |
| 5432.2 | 1.0 | -0.001 | -0.008 | -0.000 | $\langle 53 T^0, b^1, s_{\text{HB}}^2\rangle$                   | 20.73% | 0.000  | -0.003 | -0.000 |
|        |     |        |        |        | $\langle 53 T^1, b^1, s_{\text{HB}}^2\rangle$                   | 11.83% | 0.000  | -0.007 | -0.000 |
|        |     |        |        |        | $\langle 53 T^2, b^3, s^0\rangle$                               | 10.53% | 0.000  | 0.000  | 0.000  |
|        |     |        |        |        | $\langle 53 T^0, b^0, s_{\text{HB}}^2\rangle$                   | 1.95%  | -0.001 | -0.012 | 0.000  |
|        |     |        |        |        | $\langle 53 T^0, b^0, s_{\text{HB}}^1\rangle$                   | 0.01%  | 0.000  | 0.008  | -0.000 |
|        |     |        |        |        | $\langle 53 T^0, b^2, s_{\text{HB}}^1\rangle$                   | 5.46%  | 0.000  | 0.007  | 0.000  |
| 5528.7 | 0.2 | 0.002  | 0.003  | -0.000 | $\langle 59 T^0, b^2, s_{\text{HB}}^1\rangle$                   | 15.90% | 0.000  | 0.013  | 0.000  |
|        |     |        |        |        | $\langle 59 T^0, b^0, s_{\text{HB}}^1 s_{\text{free}}^1\rangle$ | 14.02% | 0.001  | -0.002 | -0.000 |
|        |     |        |        |        | $\langle 59 T^0, b^1, s_{\text{HB}}^1\rangle$                   | 1.47%  | -0.000 | -0.014 | 0.000  |
|        |     |        |        |        | $\langle 59 T^1, b^1, s_{\text{HB}}^1\rangle$                   | 0.69%  | 0.000  | 0.004  | 0.000  |
| 5560.5 | 0.1 | 0.003  | -0.001 | -0.000 | $\langle 61 T^0, b^0, s_{\text{HB}}^1 s_{\text{free}}^1\rangle$ | 18.09% | 0.001  | -0.003 | -0.000 |
|        |     |        |        |        | $\langle 61 T^1, b^1, s_{\text{free}}^1\rangle$                 | 12.37% | 0.000  | 0.000  | 0.000  |
|        |     |        |        |        | $\langle 61 T^1, b^2, s_{\text{HB}}^1\rangle$                   | 12.26% | -0.000 | 0.007  | -0.000 |
|        |     |        |        |        | $\langle 61 T^0, b^0, s_{\text{HB}}^1\rangle$                   | 0.03%  | 0.000  | 0.012  | -0.000 |
|        |     |        |        |        | $\langle 61 T^0, b^0, s_{\text{HB}}^2\rangle$                   | 1.43%  | -0.001 | -0.010 | 0.000  |

|        |     |        |        |        |                                                                  |        |        |        |        |
|--------|-----|--------|--------|--------|------------------------------------------------------------------|--------|--------|--------|--------|
| 6225.3 | 3.2 | 0.001  | 0.014  | -0.000 | $\langle 74 T^0, b^0, s_{\text{free}}^2\rangle$                  | 48.23% | 0.001  | 0.005  | -0.000 |
|        |     |        |        |        | $\langle 74 T^1, b^0, s_{\text{free}}^2\rangle$                  | 31.96% | 0.001  | 0.011  | -0.000 |
|        |     |        |        |        | $\langle 74 T^1, b^0, s^0\rangle$                                | 0.01%  | 0.000  | 0.004  | 0.000  |
| 6330.9 | 0.1 | 0.000  | 0.002  | -0.000 | $\langle 80 T^0, b^4, s^0\rangle$                                | 20.48% | 0.000  | 0.000  | 0.000  |
|        |     |        |        |        | $\langle 80 T^0, b^3, s_{\text{HB}}^1\rangle$                    | 15.44% | 0.000  | 0.000  | 0.000  |
|        |     |        |        |        | $\langle 80 T^1, b^3, s_{\text{HB}}^1\rangle$                    | 11.30% | 0.000  | 0.000  | 0.000  |
|        |     |        |        |        | $\langle 80 T^0, b^0, s_{\text{HB}}^1\rangle$                    | 0.00%  | 0.000  | 0.002  | -0.000 |
|        |     |        |        |        | $\langle 80 T^0, b^2, s_{\text{HB}}^1\rangle$                    | 3.06%  | -0.000 | -0.002 | 0.000  |
|        |     |        |        |        | $\langle 80 T^0, b^1, s_{\text{HB}}^1\rangle$                    | 0.03%  | -0.000 | -0.002 | 0.000  |
| 6698.3 | 0.1 | -0.000 | -0.000 | -0.002 | $\langle 91 T^0, b^2, s_{\text{free}}^1\rangle$                  | 61.17% | 0.000  | -0.000 | -0.003 |
|        |     |        |        |        | $\langle 91 T^1, b^2, s_{\text{free}}^1\rangle$                  | 12.07% | 0.000  | -0.000 | -0.001 |
|        |     |        |        |        | $\langle 91 T^0, b^0, s_{\text{free}}^1\rangle$                  | 0.04%  | -0.000 | -0.000 | 0.004  |
|        |     |        |        |        | $\langle 91 T^0, b^0, s_{\text{free}}^2\rangle$                  | 1.37%  | -0.000 | -0.000 | -0.002 |
| 6891.4 | 0.1 | 0.000  | 0.002  | -0.000 | $\langle 103 T^0, b^2, s_{\text{HB}}^2\rangle$                   | 18.50% | 0.000  | 0.000  | 0.000  |
|        |     |        |        |        | $\langle 103 T^1, b^4, s^0\rangle$                               | 17.33% | 0.000  | 0.000  | 0.000  |
|        |     |        |        |        | $\langle 103 T^1, b^2, s_{\text{HB}}^2\rangle$                   | 11.23% | 0.000  | 0.001  | -0.000 |
|        |     |        |        |        | $\langle 103 T^0, b^3, s_{\text{HB}}^1\rangle$                   | 11.16% | 0.000  | 0.000  | 0.000  |
|        |     |        |        |        | $\langle 103 T^0, b^0, s_{\text{HB}}^2\rangle$                   | 0.04%  | 0.000  | 0.002  | -0.000 |
|        |     |        |        |        | $\langle 103 T^1, b^0, s_{\text{free}}^2\rangle$                 | 0.50%  | -0.000 | -0.001 | 0.000  |
| 6912.5 | 0.3 | 0.001  | 0.004  | -0.000 | $\langle 104 T^0, b^1, s_{\text{HB}}^1 s_{\text{free}}^1\rangle$ | 22.74% | 0.000  | 0.000  | 0.000  |
|        |     |        |        |        | $\langle 104 T^0, b^0, s_{\text{free}}^2\rangle$                 | 12.79% | 0.002  | 0.004  | 0.000  |
|        |     |        |        |        | $\langle 104 T^0, b^0, s_{\text{HB}}^1\rangle$                   | 0.00%  | -0.000 | -0.004 | 0.000  |
|        |     |        |        |        | $\langle 104 T^0, b^1, s_{\text{HB}}^1\rangle$                   | 0.03%  | 0.000  | 0.002  | -0.000 |
| 6933.6 | 0.4 | 0.000  | 0.000  | 0.005  | $\langle 105 T^0, b^1, s_{\text{HB}}^1 s_{\text{free}}^1\rangle$ | 11.17% | 0.000  | 0.000  | 0.000  |
|        |     |        |        |        | $\langle 105 T^0, b^0, s_{\text{free}}^2\rangle$                 | 10.37% | 0.000  | 0.000  | 0.005  |
|        |     |        |        |        | $\langle 105 T^0, b^0, s_{\text{free}}^1\rangle$                 | 0.00%  | 0.000  | 0.000  | -0.001 |
|        |     |        |        |        | $\langle 105 T^0, b^2, s_{\text{free}}^1\rangle$                 | 3.44%  | -0.000 | 0.000  | 0.001  |
| 6975.8 | 0.2 | 0.000  | 0.000  | -0.003 | $\langle 106 T^1, b^2, s_{\text{free}}^1\rangle$                 | 19.31% | -0.000 | 0.000  | 0.001  |
|        |     |        |        |        | $\langle 106 T^0, b^0, s_{\text{free}}^2\rangle$                 | 8.58%  | -0.000 | -0.000 | -0.004 |
|        |     |        |        |        | $\langle 106 T^0, b^2, s_{\text{free}}^1\rangle$                 | 9.79%  | 0.000  | -0.000 | -0.001 |
|        |     |        |        |        | $\langle 106 T^0, b^0, s_{\text{free}}^1\rangle$                 | 0.00%  | -0.000 | -0.000 | 0.001  |
| 6986.1 | 1.6 | 0.003  | 0.009  | -0.000 | $\langle 107 T^0, b^0, s_{\text{free}}^2\rangle$                 | 66.57% | 0.004  | 0.009  | 0.000  |
|        |     |        |        |        | $\langle 107 T^1, b^0, s_{\text{free}}^2\rangle$                 | 7.50%  | 0.001  | 0.002  | 0.000  |
|        |     |        |        |        | $\langle 107 T^0, b^0, s_{\text{HB}}^1\rangle$                   | 0.00%  | 0.000  | 0.002  | -0.000 |
| 6996.8 | 1.7 | 0.000  | 0.000  | 0.010  | $\langle 108 T^0, b^0, s_{\text{free}}^2\rangle$                 | 46.30% | 0.000  | 0.000  | 0.010  |
|        |     |        |        |        | $\langle 108 T^0, b^2, s_{\text{free}}^1\rangle$                 | 7.37%  | 0.000  | -0.000 | -0.001 |
|        |     |        |        |        | $\langle 108 T^1, b^0, s_{\text{free}}^2\rangle$                 | 3.07%  | 0.000  | 0.000  | 0.001  |
| 6999.9 | 0.1 | -0.001 | -0.002 | -0.000 | $\langle 109 T^1, b^2, s_{\text{free}}^1\rangle$                 | 29.94% | 0.000  | 0.003  | -0.000 |
|        |     |        |        |        | $\langle 109 T^0, b^2, s_{\text{HB}}^2\rangle$                   | 9.15%  | -0.000 | 0.003  | -0.000 |
|        |     |        |        |        | $\langle 109 T^0, b^0, s_{\text{free}}^2\rangle$                 | 6.62%  | -0.001 | -0.003 | -0.000 |

| $\omega$ | $I$ | $\mu_x$ | $\mu_y$ | $\mu_z$ | Assignment                                      | $ c_{ijk}^2 $ | $\mu_x^{ijk}$ | $\mu_y^{ijk}$ | $\mu_z^{ijk}$ |
|----------|-----|---------|---------|---------|-------------------------------------------------|---------------|---------------|---------------|---------------|
| 4094.8   | 0.5 | -0.000  | -0.000  | -0.007  | $\langle 51 T^0, b^1, s_{\text{HB}}^1\rangle$   | 76.07%        | 0.000         | -0.000        | 0.045         |
|          |     |         |         |         | $\langle 51 T^0, b^0, s_{\text{HB}}^1\rangle$   | 0.32%         | -0.000        | -0.000        | -0.043        |
|          |     |         |         |         | $\langle 51 T^0, b^0, s_{\text{HB}}^2\rangle$   | 0.71%         | 0.000         | 0.000         | -0.005        |
| 4098.2   | 0.6 | 0.006   | 0.004   | -0.000  | $\langle 52 T^0, b^1, s_{\text{HB}}^1\rangle$   | 74.20%        | 0.001         | -0.017        | -0.000        |
|          |     |         |         |         | $\langle 52 T^1, b^1, s_{\text{HB}}^1\rangle$   | 10.83%        | -0.000        | -0.001        | -0.000        |
|          |     |         |         |         | $\langle 52 T^0, b^0, s_{\text{HB}}^1\rangle$   | 0.37%         | 0.001         | 0.023         | 0.000         |
|          |     |         |         |         | $\langle 52 T^0, b^0, s_{\text{free}}^1\rangle$ | 0.18%         | 0.004         | -0.007        | -0.000        |
| 4168.6   | 4.8 | 0.000   | -0.000  | -0.021  | $\langle 54 T^0, b^1, s_{\text{HB}}^1\rangle$   | 49.50%        | 0.000         | 0.000         | 0.025         |
|          |     |         |         |         | $\langle 54 T^1, b^1, s_{\text{HB}}^1\rangle$   | 32.30%        | -0.000        | 0.000         | 0.003         |
|          |     |         |         |         | $\langle 54 T^0, b^0, s_{\text{HB}}^1\rangle$   | 0.26%         | -0.000        | -0.000        | -0.039        |
|          |     |         |         |         | $\langle 54 T^0, b^0, s_{\text{HB}}^2\rangle$   | 2.12%         | 0.000         | 0.000         | -0.008        |
| 4177.2   | 2.8 | -0.001  | 0.016   | -0.000  | $\langle 55 T^0, b^1, s_{\text{HB}}^1\rangle$   | 49.10%        | -0.000        | -0.012        | 0.000         |
|          |     |         |         |         | $\langle 55 T^1, b^1, s_{\text{HB}}^1\rangle$   | 35.02%        | -0.000        | -0.002        | -0.000        |
|          |     |         |         |         | $\langle 55 T^0, b^0, s_{\text{HB}}^1\rangle$   | 0.35%         | 0.001         | 0.022         | 0.000         |
|          |     |         |         |         | $\langle 55 T^0, b^0, s_{\text{HB}}^2\rangle$   | 1.31%         | -0.000        | 0.004         | -0.000        |
| 4182.2   | 0.2 | 0.000   | 0.000   | -0.004  | $\langle 56 T^2, b^0, s_{\text{free}}^1\rangle$ | 94.89%        | -0.000        | 0.000         | 0.001         |
|          |     |         |         |         | $\langle 56 T^0, b^0, s_{\text{HB}}^1\rangle$   | 0.01%         | -0.000        | -0.000        | -0.006        |
|          |     |         |         |         | $\langle 56 T^0, b^1, s_{\text{HB}}^1\rangle$   | 1.40%         | 0.000         | 0.000         | 0.004         |
|          |     |         |         |         | $\langle 56 T^0, b^0, s_{\text{HB}}^2\rangle$   | 0.06%         | 0.000         | 0.000         | -0.001        |
| 4413.8   | 0.5 | -0.001  | 0.006   | -0.000  | $\langle 58 T^1, b^1, s_{\text{HB}}^1\rangle$   | 45.75%        | -0.000        | 0.001         | 0.000         |
|          |     |         |         |         | $\langle 58 T^1, b^1, s_{\text{HB}}^1\rangle$   | 23.24%        | -0.000        | -0.001        | -0.000        |
|          |     |         |         |         | $\langle 58 T^2, b^1, s_{\text{HB}}^1\rangle$   | 13.30%        | 0.000         | 0.000         | 0.000         |
|          |     |         |         |         | $\langle 58 T^0, b^0, s_{\text{HB}}^1\rangle$   | 0.01%         | 0.000         | 0.004         | 0.000         |
|          |     |         |         |         | $\langle 58 T^0, b^1, s_{\text{HB}}^1\rangle$   | 1.45%         | -0.000        | 0.002         | 0.000         |
|          |     |         |         |         | $\langle 58 T^0, b^0, s_{\text{HB}}^2\rangle$   | 0.31%         | -0.000        | 0.002         | -0.000        |
| 4449.5   | 0.3 | -0.001  | 0.005   | 0.000   | $\langle 61 T^1, b^1, s_{\text{HB}}^1\rangle$   | 38.49%        | 0.000         | 0.002         | 0.000         |
|          |     |         |         |         | $\langle 61 T^0, b^1, s_{\text{HB}}^1\rangle$   | 31.29%        | -0.000        | -0.010        | 0.000         |
|          |     |         |         |         | $\langle 61 T^1, b^1, s_{\text{HB}}^1\rangle$   | 10.32%        | 0.000         | -0.001        | 0.000         |
|          |     |         |         |         | $\langle 61 T^0, b^0, s_{\text{HB}}^1\rangle$   | 0.13%         | 0.000         | 0.014         | 0.000         |
|          |     |         |         |         | $\langle 61 T^1, b^0, s_{\text{HB}}^1\rangle$   | 0.21%         | -0.000        | 0.002         | 0.000         |
| 4483.8   | 1.4 | -0.002  | 0.011   | 0.000   | $\langle 62 T^1, b^1, s_{\text{HB}}^1\rangle$   | 27.68%        | 0.000         | -0.001        | -0.000        |
|          |     |         |         |         | $\langle 62 T^1, b^1, s_{\text{HB}}^1\rangle$   | 19.27%        | -0.000        | -0.001        | -0.000        |
|          |     |         |         |         | $\langle 62 T^0, b^1, s_{\text{HB}}^1\rangle$   | 17.38%        | -0.001        | 0.008         | 0.000         |
|          |     |         |         |         | $\langle 62 T^2, b^1, s_{\text{HB}}^1\rangle$   | 13.42%        | 0.000         | 0.000         | 0.000         |
|          |     |         |         |         | $\langle 62 T^0, b^0, s_{\text{HB}}^1\rangle$   | 0.03%         | -0.000        | -0.006        | -0.000        |
|          |     |         |         |         | $\langle 62 T^0, b^0, s_{\text{HB}}^2\rangle$   | 2.64%         | -0.000        | 0.005         | -0.000        |
| 4491.5   | 4.8 | 0.000   | -0.000  | 0.021   | $\langle 63 T^1, b^1, s_{\text{HB}}^1\rangle$   | 25.41%        | -0.000        | -0.000        | -0.002        |
|          |     |         |         |         | $\langle 63 T^2, b^1, s_{\text{HB}}^1\rangle$   | 18.68%        | -0.000        | -0.000        | -0.002        |
|          |     |         |         |         | $\langle 63 T^0, b^1, s_{\text{HB}}^1\rangle$   | 18.54%        | 0.000         | -0.000        | 0.022         |
|          |     |         |         |         | $\langle 63 T^1, b^1, s_{\text{HB}}^1\rangle$   | 16.62%        | -0.000        | 0.000         | -0.005        |

|        |      |        |        |        |                                               |        |        |        |        |
|--------|------|--------|--------|--------|-----------------------------------------------|--------|--------|--------|--------|
|        |      |        |        |        | $\langle 63 T^0, b^0, s_{\text{HB}}^1\rangle$ | 0.02%  | -0.000 | -0.000 | -0.010 |
|        |      |        |        |        | $\langle 63 T^0, b^0, s_{\text{HB}}^2\rangle$ | 2.50%  | -0.000 | -0.000 | 0.009  |
| 4548.2 | 2.2  | -0.000 | 0.000  | 0.014  | $\langle 64 T^1, b^1, s_{\text{HB}}^1\rangle$ | 51.11% | 0.000  | -0.000 | -0.003 |
|        |      |        |        |        | $\langle 64 T^2, b^1, s_{\text{HB}}^1\rangle$ | 24.30% | 0.000  | 0.000  | 0.000  |
|        |      |        |        |        | $\langle 64 T^0, b^1, s_{\text{HB}}^1\rangle$ | 11.52% | 0.000  | 0.000  | 0.012  |
|        |      |        |        |        | $\langle 64 T^0, b^0, s_{\text{HB}}^1\rangle$ | 0.02%  | -0.000 | -0.000 | -0.009 |
|        |      |        |        |        | $\langle 64 T^0, b^0, s_{\text{HB}}^2\rangle$ | 1.13%  | -0.000 | -0.000 | 0.006  |
| 4553.1 | 1.8  | -0.000 | 0.013  | -0.000 | $\langle 65 T^1, b^1, s_{\text{HB}}^1\rangle$ | 42.13% | 0.000  | -0.002 | 0.000  |
|        |      |        |        |        | $\langle 65 T^2, b^1, s_{\text{HB}}^1\rangle$ | 21.89% | 0.000  | 0.000  | 0.000  |
|        |      |        |        |        | $\langle 65 T^0, b^1, s_{\text{HB}}^1\rangle$ | 12.27% | 0.000  | 0.006  | -0.000 |
|        |      |        |        |        | $\langle 65 T^0, b^0, s_{\text{HB}}^2\rangle$ | 8.24%  | -0.001 | 0.009  | -0.000 |
|        |      |        |        |        | $\langle 65 T^0, b^0, s_{\text{HB}}^1\rangle$ | 0.01%  | -0.000 | -0.003 | -0.000 |
| 4603.9 | 10.6 | 0.001  | -0.030 | -0.000 | $\langle 66 T^0, b^0, s_{\text{HB}}^2\rangle$ | 39.96% | 0.001  | -0.020 | 0.000  |
|        |      |        |        |        | $\langle 66 T^1, b^0, s_{\text{HB}}^2\rangle$ | 19.91% | 0.000  | 0.003  | 0.000  |
|        |      |        |        |        | $\langle 66 T^0, b^0, s_{\text{HB}}^1\rangle$ | 0.07%  | -0.000 | -0.010 | -0.000 |
| 4605.4 | 39.9 | -0.000 | 0.000  | -0.059 | $\langle 67 T^0, b^0, s_{\text{HB}}^2\rangle$ | 41.61% | 0.000  | 0.000  | -0.038 |
|        |      |        |        |        | $\langle 67 T^1, b^0, s_{\text{HB}}^2\rangle$ | 27.90% | 0.000  | -0.000 | 0.008  |
|        |      |        |        |        | $\langle 67 T^0, b^0, s_{\text{HB}}^1\rangle$ | 0.06%  | -0.000 | -0.000 | -0.018 |
| 4814.3 | 0.2  | -0.000 | 0.000  | 0.004  | $\langle 70 T^2, b^1, s_{\text{HB}}^1\rangle$ | 35.57% | 0.000  | 0.000  | 0.000  |
|        |      |        |        |        | $\langle 70 T^1, b^1, s_{\text{HB}}^1\rangle$ | 13.06% | -0.000 | 0.000  | 0.001  |
|        |      |        |        |        | $\langle 70 T^2, b^1, s_{\text{HB}}^1\rangle$ | 12.33% | 0.000  | 0.000  | 0.002  |
|        |      |        |        |        | $\langle 70 T^0, b^0, s_{\text{HB}}^2\rangle$ | 0.22%  | -0.000 | -0.000 | 0.003  |
|        |      |        |        |        | $\langle 70 T^0, b^1, s_{\text{HB}}^1\rangle$ | 0.18%  | 0.000  | -0.000 | 0.002  |
|        |      |        |        |        | $\langle 70 T^1, b^0, s_{\text{HB}}^1\rangle$ | 0.02%  | 0.000  | -0.000 | -0.002 |
| 4851.3 | 0.1  | -0.000 | 0.000  | -0.003 | $\langle 73 T^2, b^1, s_{\text{HB}}^1\rangle$ | 56.71% | 0.000  | -0.000 | 0.003  |
|        |      |        |        |        | $\langle 73 T^2, b^1, s_{\text{HB}}^1\rangle$ | 16.48% | -0.000 | -0.000 | -0.002 |
|        |      |        |        |        | $\langle 73 T^1, b^1, s_{\text{HB}}^1\rangle$ | 11.02% | 0.000  | 0.000  | 0.001  |
|        |      |        |        |        | $\langle 73 T^1, b^1, s_{\text{HB}}^1\rangle$ | 3.90%  | -0.000 | 0.000  | -0.003 |
|        |      |        |        |        | $\langle 73 T^0, b^0, s_{\text{HB}}^1\rangle$ | 0.00%  | 0.000  | 0.000  | 0.002  |
| 4912.3 | 2.7  | 0.000  | -0.000 | -0.015 | $\langle 75 T^2, b^1, s_{\text{HB}}^1\rangle$ | 45.42% | -0.000 | -0.000 | -0.002 |
|        |      |        |        |        | $\langle 75 T^1, b^1, s_{\text{HB}}^1\rangle$ | 12.60% | -0.000 | 0.000  | 0.002  |
|        |      |        |        |        | $\langle 75 T^2, b^1, s_{\text{HB}}^1\rangle$ | 10.07% | 0.000  | 0.000  | 0.000  |
|        |      |        |        |        | $\langle 75 T^0, b^0, s_{\text{HB}}^2\rangle$ | 2.97%  | 0.000  | 0.000  | -0.010 |
|        |      |        |        |        | $\langle 75 T^0, b^0, s_{\text{HB}}^1\rangle$ | 0.00%  | 0.000  | 0.000  | 0.003  |
|        |      |        |        |        | $\langle 75 T^0, b^1, s_{\text{HB}}^1\rangle$ | 0.45%  | -0.000 | -0.000 | -0.002 |
| 4917.3 | 0.8  | -0.000 | 0.008  | -0.000 | $\langle 76 T^1, b^0, s_{\text{HB}}^2\rangle$ | 29.84% | 0.000  | 0.001  | -0.000 |
|        |      |        |        |        | $\langle 76 T^2, b^1, s_{\text{HB}}^1\rangle$ | 12.53% | 0.000  | 0.000  | 0.000  |
|        |      |        |        |        | $\langle 76 T^1, b^0, s_{\text{HB}}^2\rangle$ | 10.15% | 0.000  | 0.002  | 0.000  |
|        |      |        |        |        | $\langle 76 T^0, b^0, s_{\text{HB}}^2\rangle$ | 4.75%  | -0.000 | 0.007  | -0.000 |
|        |      |        |        |        | $\langle 76 T^0, b^0, s_{\text{HB}}^1\rangle$ | 0.01%  | -0.000 | -0.003 | -0.000 |
| 4926.5 | 0.1  | 0.001  | -0.002 | -0.000 | $\langle 77 T^0, b^3, s^0\rangle$             | 89.76% | 0.002  | -0.002 | 0.000  |
|        |      |        |        |        | $\langle 77 T^0, b^1, s_{\text{HB}}^1\rangle$ | 0.59%  | 0.000  | -0.001 | -0.000 |
|        |      |        |        |        | $\langle 77 T^0, b^1, s^0\rangle$             | 0.05%  | -0.001 | 0.001  | -0.000 |
| 4944.8 | 0.1  | 0.000  | -0.003 | -0.000 | $\langle 78 T^2, b^1, s_{\text{HB}}^1\rangle$ | 49.59% | 0.000  | 0.000  | 0.000  |
|        |      |        |        |        | $\langle 78 T^1, b^0, s_{\text{HB}}^2\rangle$ | 14.72% | -0.000 | -0.001 | 0.000  |

|        |     |        |        |        |                                                 |        |        |        |        |
|--------|-----|--------|--------|--------|-------------------------------------------------|--------|--------|--------|--------|
|        |     |        |        |        | $\langle 78 T^0, b^0, s_{\text{HB}}^2\rangle$   | 0.23%  | 0.000  | -0.002 | 0.000  |
|        |     |        |        |        | $\langle 78 T^1, b^0, s_{\text{HB}}^2\rangle$   | 2.23%  | -0.000 | -0.001 | -0.000 |
|        |     |        |        |        | $\langle 78 T^1, b^0, s_{\text{HB}}^1\rangle$   | 0.05%  | 0.000  | 0.001  | 0.000  |
| 4956.8 | 0.6 | 0.000  | -0.000 | 0.007  | $\langle 79 T^0, b^3, s^0\rangle$               | 72.46% | -0.000 | 0.000  | -0.001 |
|        |     |        |        |        | $\langle 79 T^0, b^0, s_{\text{HB}}^2\rangle$   | 0.91%  | -0.000 | -0.000 | 0.006  |
|        |     |        |        |        | $\langle 79 T^0, b^1, s_{\text{HB}}^1\rangle$   | 0.49%  | -0.000 | 0.000  | -0.004 |
|        |     |        |        |        | $\langle 79 T^1, b^0, s_{\text{HB}}^2\rangle$   | 2.31%  | 0.000  | -0.000 | 0.002  |
| 4959.8 | 3.5 | 0.000  | -0.000 | 0.017  | $\langle 80 T^1, b^0, s_{\text{HB}}^2\rangle$   | 30.34% | 0.000  | -0.000 | 0.004  |
|        |     |        |        |        | $\langle 80 T^0, b^3, s^0\rangle$               | 20.75% | 0.000  | 0.000  | 0.000  |
|        |     |        |        |        | $\langle 80 T^2, b^1, s_{\text{HB}}^1\rangle$   | 12.32% | -0.000 | -0.000 | -0.001 |
|        |     |        |        |        | $\langle 80 T^0, b^0, s_{\text{HB}}^2\rangle$   | 2.98%  | -0.000 | -0.000 | 0.010  |
|        |     |        |        |        | $\langle 80 T^0, b^0, s_{\text{HB}}^1\rangle$   | 0.00%  | -0.000 | -0.000 | -0.005 |
|        |     |        |        |        | $\langle 80 T^1, b^0, s_{\text{HB}}^2\rangle$   | 7.93%  | 0.000  | -0.000 | 0.004  |
| 4977.7 | 0.2 | -0.001 | 0.004  | -0.000 | $\langle 82 T^2, b^1, s_{\text{HB}}^1\rangle$   | 52.90% | 0.000  | 0.000  | 0.000  |
|        |     |        |        |        | $\langle 82 T^0, b^0, s_{\text{HB}}^2\rangle$   | 1.74%  | -0.000 | 0.004  | -0.000 |
|        |     |        |        |        | $\langle 82 T^0, b^0, s_{\text{HB}}^1\rangle$   | 0.00%  | -0.000 | -0.002 | -0.000 |
|        |     |        |        |        | $\langle 82 T^0, b^1, s_{\text{HB}}^1\rangle$   | 0.48%  | -0.000 | 0.001  | 0.000  |
| 4993.8 | 0.3 | -0.000 | 0.000  | -0.005 | $\langle 83 T^2, b^1, s_{\text{HB}}^1\rangle$   | 40.48% | -0.000 | -0.000 | -0.001 |
|        |     |        |        |        | $\langle 83 T^2, b^1, s_{\text{HB}}^1\rangle$   | 33.64% | 0.000  | 0.000  | 0.000  |
|        |     |        |        |        | $\langle 83 T^0, b^0, s_{\text{HB}}^2\rangle$   | 0.62%  | 0.000  | 0.000  | -0.005 |
|        |     |        |        |        | $\langle 83 T^1, b^1, s_{\text{HB}}^1\rangle$   | 5.07%  | 0.000  | -0.000 | 0.003  |
|        |     |        |        |        | $\langle 83 T^0, b^0, s_{\text{HB}}^1\rangle$   | 0.00%  | 0.000  | 0.000  | 0.003  |
| 5019.4 | 1.1 | 0.000  | -0.000 | 0.010  | $\langle 84 T^2, b^1, s_{\text{HB}}^1\rangle$   | 42.82% | 0.000  | 0.000  | 0.000  |
|        |     |        |        |        | $\langle 84 T^2, b^1, s_{\text{HB}}^1\rangle$   | 20.81% | 0.000  | 0.000  | 0.001  |
|        |     |        |        |        | $\langle 84 T^0, b^0, s_{\text{HB}}^2\rangle$   | 2.34%  | -0.000 | -0.000 | 0.009  |
|        |     |        |        |        | $\langle 84 T^0, b^0, s_{\text{HB}}^1\rangle$   | 0.01%  | -0.000 | -0.000 | -0.006 |
|        |     |        |        |        | $\langle 84 T^1, b^1, s_{\text{HB}}^1\rangle$   | 4.00%  | -0.000 | 0.000  | -0.003 |
| 5037.8 | 0.3 | 0.000  | -0.005 | -0.000 | $\langle 85 T^2, b^1, s_{\text{HB}}^1\rangle$   | 64.58% | 0.000  | -0.001 | 0.000  |
|        |     |        |        |        | $\langle 85 T^1, b^1, s_{\text{HB}}^1\rangle$   | 12.07% | -0.000 | 0.001  | -0.000 |
|        |     |        |        |        | $\langle 85 T^0, b^0, s_{\text{HB}}^2\rangle$   | 3.34%  | 0.000  | -0.006 | 0.000  |
|        |     |        |        |        | $\langle 85 T^0, b^0, s_{\text{HB}}^1\rangle$   | 0.01%  | 0.000  | 0.004  | 0.000  |
| 5096.4 | 1.7 | 0.001  | -0.012 | 0.000  | $\langle 86 T^0, b^0, s_{\text{HB}}^2\rangle$   | 28.47% | 0.001  | -0.017 | 0.000  |
|        |     |        |        |        | $\langle 86 T^1, b^0, s_{\text{HB}}^2\rangle$   | 19.50% | 0.000  | 0.001  | -0.000 |
|        |     |        |        |        | $\langle 86 T^2, b^0, s_{\text{HB}}^2\rangle$   | 13.12% | -0.000 | -0.000 | -0.000 |
|        |     |        |        |        | $\langle 86 T^1, b^0, s_{\text{HB}}^2\rangle$   | 11.56% | -0.000 | -0.002 | -0.000 |
|        |     |        |        |        | $\langle 86 T^0, b^0, s_{\text{HB}}^1\rangle$   | 0.03%  | 0.000  | 0.006  | 0.000  |
| 5115.7 | 9.2 | 0.000  | -0.000 | -0.027 | $\langle 87 T^0, b^0, s_{\text{HB}}^2\rangle$   | 33.99% | 0.000  | 0.000  | -0.034 |
|        |     |        |        |        | $\langle 87 T^1, b^0, s_{\text{HB}}^2\rangle$   | 16.07% | 0.000  | -0.000 | 0.003  |
|        |     |        |        |        | $\langle 87 T^1, b^0, s_{\text{HB}}^2\rangle$   | 13.67% | -0.000 | 0.000  | -0.006 |
|        |     |        |        |        | $\langle 87 T^2, b^0, s_{\text{HB}}^2\rangle$   | 13.44% | -0.000 | 0.000  | -0.003 |
|        |     |        |        |        | $\langle 87 T^2, b^0, s_{\text{HB}}^2\rangle$   | 11.65% | -0.000 | -0.000 | -0.004 |
|        |     |        |        |        | $\langle 87 T^0, b^0, s_{\text{HB}}^1\rangle$   | 0.05%  | 0.000  | 0.000  | 0.017  |
| 5214.6 | 1.4 | 0.000  | -0.000 | 0.010  | $\langle 92 T^1, b^3, s^0\rangle$               | 51.49% | 0.000  | 0.000  | 0.000  |
|        |     |        |        |        | $\langle 92 T^0, b^1, s_{\text{free}}^1\rangle$ | 40.58% | 0.000  | -0.000 | 0.004  |
|        |     |        |        |        | $\langle 92 T^0, b^0, s_{\text{HB}}^1\rangle$   | 0.00%  | 0.000  | 0.000  | 0.004  |

|        |     |        |        |        |                                                 |        |        |        |        |
|--------|-----|--------|--------|--------|-------------------------------------------------|--------|--------|--------|--------|
|        |     |        |        |        | $\langle 92 T^0, b^2, s_{\text{HB}}^1\rangle$   | 0.60%  | 0.000  | 0.000  | 0.001  |
| 5218.2 | 2.2 | -0.000 | 0.000  | -0.013 | $\langle 93 T^0, b^1, s_{\text{free}}^1\rangle$ | 52.11% | -0.000 | 0.000  | -0.005 |
|        |     |        |        |        | $\langle 93 T^1, b^3, s^0\rangle$               | 38.12% | 0.000  | 0.000  | 0.000  |
|        |     |        |        |        | $\langle 93 T^0, b^0, s_{\text{HB}}^1\rangle$   | 0.01%  | -0.000 | -0.000 | -0.006 |
|        |     |        |        |        | $\langle 93 T^0, b^0, s_{\text{HB}}^2\rangle$   | 0.10%  | 0.000  | 0.000  | -0.002 |
| 5258.5 | 2.3 | -0.004 | 0.013  | 0.000  | $\langle 95 T^0, b^1, s_{\text{free}}^1\rangle$ | 93.75% | -0.000 | 0.005  | 0.000  |
|        |     |        |        |        | $\langle 95 T^0, b^0, s_{\text{free}}^1\rangle$ | 0.16%  | -0.004 | 0.006  | 0.000  |
|        |     |        |        |        | $\langle 95 T^0, b^0, s_{\text{HB}}^1\rangle$   | 0.00%  | 0.000  | 0.002  | 0.000  |
| 5371.8 | 0.2 | 0.001  | 0.003  | 0.000  | $\langle 98 T^0, b^0, s_{\text{HB}}^2\rangle$   | 43.85% | 0.001  | 0.005  | 0.000  |
|        |     |        |        |        | $\langle 98 T^2, b^0, s_{\text{HB}}^2\rangle$   | 17.64% | -0.000 | -0.000 | -0.000 |
|        |     |        |        |        | $\langle 98 T^2, b^0, s_{\text{HB}}^2\rangle$   | 14.75% | 0.000  | -0.001 | 0.000  |
|        |     |        |        |        | $\langle 98 T^0, b^0, s_{\text{HB}}^1\rangle$   | 0.00%  | 0.000  | 0.001  | 0.000  |
| 5412.5 | 0.1 | 0.000  | 0.000  | -0.002 | $\langle 100 T^2, b^0, s_{\text{HB}}^2\rangle$  | 37.85% | -0.000 | -0.000 | -0.002 |
|        |     |        |        |        | $\langle 100 T^2, b^0, s_{\text{HB}}^2\rangle$  | 34.32% | -0.000 | 0.000  | -0.005 |
|        |     |        |        |        | $\langle 100 T^2, b^0, s_{\text{HB}}^2\rangle$  | 10.31% | 0.000  | 0.000  | 0.004  |
|        |     |        |        |        | $\langle 100 T^0, b^0, s_{\text{HB}}^1\rangle$  | 0.01%  | 0.000  | 0.000  | 0.006  |
| 5424.4 | 0.3 | -0.001 | -0.005 | 0.000  | $\langle 101 T^0, b^0, s_{\text{HB}}^2\rangle$  | 40.44% | -0.001 | -0.005 | -0.000 |
|        |     |        |        |        | $\langle 101 T^2, b^0, s_{\text{HB}}^2\rangle$  | 33.72% | -0.000 | -0.000 | -0.000 |
|        |     |        |        |        | $\langle 101 T^2, b^0, s_{\text{HB}}^2\rangle$  | 18.46% | 0.000  | -0.001 | 0.000  |
|        |     |        |        |        | $\langle 101 T^0, b^0, s_{\text{HB}}^1\rangle$  | 0.01%  | 0.000  | 0.003  | 0.000  |
| 5605.2 | 0.1 | 0.000  | 0.003  | -0.000 | $\langle 116 T^2, b^0, s_{\text{HB}}^2\rangle$  | 30.60% | -0.000 | -0.001 | -0.000 |
|        |     |        |        |        | $\langle 116 T^2, b^0, s_{\text{HB}}^2\rangle$  | 25.68% | 0.000  | 0.000  | 0.000  |
|        |     |        |        |        | $\langle 116 T^1, b^0, s_{\text{HB}}^2\rangle$  | 16.13% | 0.000  | 0.003  | 0.000  |
|        |     |        |        |        | $\langle 116 T^0, b^0, s_{\text{HB}}^1\rangle$  | 0.01%  | -0.000 | -0.004 | -0.000 |
|        |     |        |        |        | $\langle 116 T^0, b^0, s_{\text{HB}}^2\rangle$  | 0.75%  | -0.000 | 0.003  | -0.000 |
| 5668.8 | 0.2 | 0.000  | -0.000 | 0.004  | $\langle 119 T^0, b^2, s_{\text{HB}}^1\rangle$  | 33.49% | -0.000 | -0.000 | -0.009 |
|        |     |        |        |        | $\langle 119 T^0, b^2, s_{\text{HB}}^1\rangle$  | 32.10% | -0.000 | -0.000 | -0.010 |
|        |     |        |        |        | $\langle 119 T^0, b^0, s_{\text{HB}}^1\rangle$  | 0.08%  | 0.000  | 0.000  | 0.021  |
| 5684.9 | 0.1 | 0.000  | -0.000 | -0.003 | $\langle 120 T^0, b^2, s_{\text{HB}}^1\rangle$  | 35.08% | -0.000 | -0.000 | -0.011 |
|        |     |        |        |        | $\langle 120 T^0, b^2, s_{\text{HB}}^1\rangle$  | 24.81% | 0.000  | 0.000  | 0.008  |
|        |     |        |        |        | $\langle 120 T^0, b^0, s_{\text{HB}}^1\rangle$  | 0.00%  | 0.000  | 0.000  | 0.005  |
| 5686.9 | 0.1 | -0.000 | 0.002  | -0.000 | $\langle 121 T^0, b^2, s_{\text{HB}}^1\rangle$  | 67.54% | 0.000  | 0.001  | -0.000 |
|        |     |        |        |        | $\langle 121 T^0, b^0, s_{\text{HB}}^1\rangle$  | 0.01%  | 0.000  | 0.004  | 0.000  |
|        |     |        |        |        | $\langle 121 T^0, b^0, s_{\text{HB}}^2\rangle$  | 0.14%  | -0.000 | 0.001  | -0.000 |
|        |     |        |        |        | $\langle 121 T^0, b^2, s_{\text{HB}}^1\rangle$  | 1.87%  | 0.000  | -0.001 | -0.000 |
| 5792.5 | 0.3 | 0.000  | -0.000 | -0.005 | $\langle 130 T^2, b^0, s_{\text{HB}}^2\rangle$  | 25.68% | 0.000  | 0.000  | 0.006  |
|        |     |        |        |        | $\langle 130 T^1, b^0, s_{\text{HB}}^2\rangle$  | 16.26% | 0.000  | 0.000  | 0.000  |
|        |     |        |        |        | $\langle 130 T^1, b^0, s_{\text{HB}}^2\rangle$  | 13.51% | -0.000 | 0.000  | -0.006 |
|        |     |        |        |        | $\langle 130 T^2, b^0, s_{\text{HB}}^2\rangle$  | 13.29% | 0.000  | -0.000 | 0.003  |
|        |     |        |        |        | $\langle 130 T^0, b^0, s_{\text{HB}}^2\rangle$  | 3.19%  | 0.000  | 0.000  | -0.010 |
|        |     |        |        |        | $\langle 130 T^0, b^0, s_{\text{HB}}^1\rangle$  | 0.02%  | 0.000  | 0.000  | 0.010  |
| 6039.5 | 0.1 | 0.000  | -0.000 | -0.002 | $\langle 140 T^1, b^2, s_{\text{HB}}^1\rangle$  | 23.29% | -0.000 | -0.000 | 0.002  |
|        |     |        |        |        | $\langle 140 T^2, b^0, s_{\text{HB}}^2\rangle$  | 18.42% | 0.000  | 0.000  | -0.001 |
|        |     |        |        |        | $\langle 140 T^0, b^2, s_{\text{HB}}^1\rangle$  | 18.12% | 0.000  | 0.000  | 0.000  |
|        |     |        |        |        | $\langle 140 T^0, b^0, s_{\text{HB}}^2\rangle$  | 0.22%  | 0.000  | 0.000  | -0.003 |



|        |     |        |        |        |                                                                  |        |        |        |        |
|--------|-----|--------|--------|--------|------------------------------------------------------------------|--------|--------|--------|--------|
|        |     |        |        |        | $\langle 140 T^1, b^0, s^0\rangle$                               | 0.00%  | -0.000 | -0.000 | -0.003 |
| 6164.4 | 0.1 | 0.001  | -0.002 | -0.000 | $\langle 151 T^1, b^2, s_{\text{HB}}^1\rangle$                   | 20.51% | -0.000 | -0.001 | -0.000 |
|        |     |        |        |        | $\langle 151 T^2, b^2, s_{\text{HB}}^1\rangle$                   | 14.01% | 0.000  | 0.000  | 0.000  |
|        |     |        |        |        | $\langle 151 T^0, b^1, s_{\text{HB}}^2\rangle$                   | 10.40% | -0.000 | -0.001 | -0.000 |
|        |     |        |        |        | $\langle 151 T^0, b^0, s_{\text{HB}}^2\rangle$                   | 0.37%  | 0.000  | -0.002 | 0.000  |
|        |     |        |        |        | $\langle 151 T^0, b^2, s_{\text{HB}}^1\rangle$                   | 8.52%  | -0.000 | 0.001  | 0.000  |
|        |     |        |        |        | $\langle 151 T^0, b^0, s_{\text{HB}}^1 s_{\text{free}}^1\rangle$ | 5.42%  | 0.001  | -0.000 | 0.000  |
| 6194.5 | 0.2 | 0.002  | -0.003 | -0.000 | $\langle 153 T^0, b^1, s_{\text{HB}}^2\rangle$                   | 16.75% | -0.000 | -0.001 | -0.000 |
|        |     |        |        |        | $\langle 153 T^1, b^2, s_{\text{HB}}^1\rangle$                   | 11.67% | 0.000  | 0.000  | 0.000  |
|        |     |        |        |        | $\langle 153 T^2, b^2, s_{\text{HB}}^1\rangle$                   | 10.88% | 0.000  | 0.000  | 0.000  |
|        |     |        |        |        | $\langle 153 T^0, b^0, s_{\text{HB}}^2\rangle$                   | 0.54%  | 0.000  | -0.002 | 0.000  |
|        |     |        |        |        | $\langle 153 T^0, b^0, s_{\text{HB}}^1\rangle$                   | 0.00%  | 0.000  | 0.002  | 0.000  |
|        |     |        |        |        | $\langle 153 T^0, b^0, s_{\text{HB}}^1 s_{\text{free}}^1\rangle$ | 7.44%  | 0.001  | -0.001 | 0.000  |
| 6214.9 | 0.3 | 0.003  | -0.003 | -0.000 | $\langle 155 T^0, b^0, s_{\text{HB}}^1 s_{\text{free}}^1\rangle$ | 42.85% | 0.003  | -0.001 | 0.000  |
|        |     |        |        |        | $\langle 155 T^1, b^0, s_{\text{HB}}^1 s_{\text{free}}^1\rangle$ | 20.71% | -0.000 | 0.001  | 0.000  |
|        |     |        |        |        | $\langle 155 T^0, b^0, s_{\text{HB}}^1\rangle$                   | 0.01%  | -0.000 | -0.004 | -0.000 |
|        |     |        |        |        | $\langle 155 T^0, b^0, s_{\text{HB}}^2\rangle$                   | 0.35%  | -0.000 | 0.002  | -0.000 |
| 6444.9 | 0.1 | 0.001  | -0.001 | -0.000 | $\langle 165 T^1, b^0, s_{\text{HB}}^1 s_{\text{free}}^1\rangle$ | 23.84% | 0.000  | -0.001 | -0.000 |
|        |     |        |        |        | $\langle 165 T^2, b^2, s_{\text{HB}}^1\rangle$                   | 17.67% | 0.000  | 0.000  | 0.000  |
|        |     |        |        |        | $\langle 165 T^0, b^0, s_{\text{HB}}^1 s_{\text{free}}^1\rangle$ | 13.09% | 0.002  | -0.001 | 0.000  |
|        |     |        |        |        | $\langle 165 T^0, b^0, s_{\text{free}}^1\rangle$                 | 0.01%  | -0.001 | 0.001  | 0.000  |
| 6473.7 | 0.1 | -0.002 | 0.002  | 0.000  | $\langle 167 T^1, b^1, s_{\text{HB}}^2\rangle$                   | 25.29% | 0.000  | 0.001  | -0.000 |
|        |     |        |        |        | $\langle 167 T^1, b^0, s_{\text{HB}}^1 s_{\text{free}}^1\rangle$ | 12.52% | -0.000 | 0.000  | 0.000  |
|        |     |        |        |        | $\langle 167 T^0, b^0, s_{\text{HB}}^1 s_{\text{free}}^1\rangle$ | 8.60%  | -0.002 | 0.001  | -0.000 |
|        |     |        |        |        | $\langle 167 T^0, b^0, s_{\text{free}}^1\rangle$                 | 0.00%  | 0.001  | -0.001 | -0.000 |
|        |     |        |        |        | $\langle 167 T^0, b^0, s_{\text{HB}}^2\rangle$                   | 0.07%  | -0.000 | 0.001  | -0.000 |
| 6649.2 | 0.1 | 0.000  | -0.000 | 0.002  | $\langle 186 T^2, b^2, s_{\text{HB}}^1\rangle$                   | 30.64% | 0.000  | 0.000  | 0.000  |
|        |     |        |        |        | $\langle 186 T^2, b^2, s_{\text{HB}}^1\rangle$                   | 14.64% | 0.000  | 0.000  | 0.000  |
|        |     |        |        |        | $\langle 186 T^0, b^0, s_{\text{HB}}^2\rangle$                   | 0.15%  | 0.000  | 0.000  | -0.002 |
|        |     |        |        |        | $\langle 186 T^0, b^0, s_{\text{HB}}^1\rangle$                   | 0.00%  | 0.000  | 0.000  | 0.001  |
|        |     |        |        |        | $\langle 186 [1, 0, 10]\rangle$                                  | 1.88%  | -0.000 | -0.000 | 0.001  |
| 6679.9 | 0.7 | 0.000  | -0.000 | -0.006 | $\langle 189 T^0, b^0, s_{\text{free}}^2\rangle$                 | 27.35% | 0.000  | -0.000 | -0.005 |
|        |     |        |        |        | $\langle 189 [1, 0, 10]\rangle$                                  | 24.03% | 0.000  | 0.000  | -0.005 |
|        |     |        |        |        | $\langle 189 T^1, b^0, s^0\rangle$                               | 0.01%  | -0.000 | -0.000 | -0.005 |
| 6686.4 | 0.1 | 0.001  | -0.003 | 0.000  | $\langle 190 T^1, b^0, s_{\text{free}}^2\rangle$                 | 25.63% | 0.000  | -0.002 | 0.000  |
|        |     |        |        |        | $\langle 190 [0, 0, 10]\rangle$                                  | 24.40% | 0.001  | -0.002 | -0.000 |
|        |     |        |        |        | $\langle 190 T^0, b^1, s_{\text{HB}}^2\rangle$                   | 18.39% | 0.000  | 0.001  | 0.000  |
|        |     |        |        |        | $\langle 190 T^0, b^0, s^0\rangle$                               | 0.02%  | -0.000 | -0.001 | -0.000 |
| 6719.1 | 0.1 | -0.000 | 0.000  | -0.002 | $\langle 192 T^0, b^0, s_{\text{free}}^2\rangle$                 | 18.47% | 0.000  | -0.000 | -0.004 |
|        |     |        |        |        | $\langle 192 T^0, b^1, s_{\text{HB}}^2\rangle$                   | 10.01% | 0.000  | 0.000  | 0.000  |
|        |     |        |        |        | $\langle 192 T^0, b^0, s_{\text{HB}}^1\rangle$                   | 0.01%  | 0.000  | 0.000  | 0.007  |
|        |     |        |        |        | $\langle 192 T^1, b^0, s^0\rangle$                               | 0.01%  | -0.000 | -0.000 | -0.004 |

| $\omega$ | $I$ | $\mu_x$ | $\mu_y$ | $\mu_z$ | Assignment                         | $ C_{ijk}^2 $ | $\mu_x^{ijk}$ | $\mu_y^{ijk}$ | $\mu_z^{ijk}$ |
|----------|-----|---------|---------|---------|------------------------------------|---------------|---------------|---------------|---------------|
| 4463.8   | 1.7 | 0.000   | -0.012  | -0.000  | $\langle 91 T^0, b^1, s^1\rangle$  | 45.54%        | -0.001        | -0.014        | 0.002         |
|          |     |         |         |         | $\langle 91 T^0, b^1, s^1\rangle$  | 38.81%        | -0.001        | -0.012        | -0.002        |
|          |     |         |         |         | $\langle 91 T^0, b^0, s^1\rangle$  | 0.02%         | -0.000        | 0.009         | -0.000        |
| 4470.8   | 2.0 | -0.013  | -0.000  | -0.000  | $\langle 92 T^0, b^1, s^1\rangle$  | 51.40%        | -0.013        | 0.001         | 0.000         |
|          |     |         |         |         | $\langle 92 T^0, b^1, s^1\rangle$  | 31.54%        | -0.010        | 0.001         | -0.000        |
|          |     |         |         |         | $\langle 92 T^0, b^0, s^1\rangle$  | 0.01%         | 0.006         | 0.000         | -0.000        |
| 4502.4   | 0.1 | 0.000   | 0.001   | -0.003  | $\langle 93 T^0, b^1, s^1\rangle$  | 46.28%        | 0.001         | 0.013         | 0.002         |
|          |     |         |         |         | $\langle 93 T^0, b^1, s^1\rangle$  | 41.07%        | -0.001        | -0.013        | 0.002         |
|          |     |         |         |         | $\langle 93 T^0, b^0, s^1\rangle$  | 0.23%         | -0.000        | -0.002        | -0.007        |
| 4574.0   | 0.1 | 0.000   | -0.002  | -0.000  | $\langle 94 T^0, b^1, s^1\rangle$  | 72.46%        | -0.001        | 0.014         | 0.000         |
|          |     |         |         |         | $\langle 94 T^0, b^0, s^1\rangle$  | 0.09%         | 0.000         | -0.019        | 0.000         |
|          |     |         |         |         | $\langle 94 T^0, b^1, s^1\rangle$  | 3.04%         | 0.000         | 0.003         | 0.000         |
| 4732.1   | 0.4 | 0.000   | -0.006  | -0.000  | $\langle 96 T^1, b^1, s^1\rangle$  | 58.93%        | -0.000        | 0.003         | 0.000         |
|          |     |         |         |         | $\langle 96 T^1, b^1, s^1\rangle$  | 14.39%        | -0.000        | 0.000         | -0.000        |
|          |     |         |         |         | $\langle 96 T^0, b^0, s^1\rangle$  | 0.01%         | 0.000         | -0.007        | 0.000         |
|          |     |         |         |         | $\langle 96 T^0, b^1, s^1\rangle$  | 1.39%         | -0.000        | -0.002        | 0.000         |
| 4735.2   | 0.4 | 0.006   | 0.000   | 0.000   | $\langle 97 T^1, b^1, s^1\rangle$  | 45.13%        | -0.003        | -0.000        | 0.000         |
|          |     |         |         |         | $\langle 97 T^1, b^1, s^1\rangle$  | 24.40%        | -0.000        | -0.000        | -0.000        |
|          |     |         |         |         | $\langle 97 T^0, b^0, s^1\rangle$  | 0.02%         | 0.008         | 0.000         | -0.000        |
|          |     |         |         |         | $\langle 97 T^0, b^1, s^1\rangle$  | 2.92%         | 0.003         | -0.000        | 0.000         |
| 4801.9   | 0.2 | -0.000  | 0.004   | -0.000  | $\langle 103 T^1, b^1, s^1\rangle$ | 37.67%        | -0.000        | -0.002        | 0.000         |
|          |     |         |         |         | $\langle 103 T^1, b^1, s^1\rangle$ | 30.44%        | 0.000         | 0.001         | -0.000        |
|          |     |         |         |         | $\langle 103 T^0, b^0, s^1\rangle$ | 0.01%         | 0.000         | -0.005        | 0.000         |
|          |     |         |         |         | $\langle 103 T^0, b^1, s^1\rangle$ | 6.73%         | -0.000        | 0.004         | 0.000         |
|          |     |         |         |         | $\langle 103 T^0, b^1, s^1\rangle$ | 1.54%         | 0.000         | 0.002         | -0.000        |
| 4804.1   | 0.2 | -0.004  | -0.000  | 0.000   | $\langle 104 T^1, b^1, s^1\rangle$ | 44.31%        | 0.002         | -0.000        | 0.000         |
|          |     |         |         |         | $\langle 104 T^1, b^1, s^1\rangle$ | 28.24%        | -0.001        | 0.000         | -0.000        |
|          |     |         |         |         | $\langle 104 T^0, b^1, s^1\rangle$ | 8.34%         | -0.005        | -0.000        | -0.000        |
|          |     |         |         |         | $\langle 104 T^0, b^0, s^1\rangle$ | 0.01%         | 0.005         | 0.000         | -0.000        |
|          |     |         |         |         | $\langle 104 T^0, b^1, s^1\rangle$ | 0.86%         | -0.002        | 0.000         | 0.000         |
| 4809.1   | 0.1 | 0.000   | -0.003  | 0.000   | $\langle 105 T^1, b^1, s^1\rangle$ | 43.08%        | 0.000         | 0.001         | -0.000        |
|          |     |         |         |         | $\langle 105 T^1, b^1, s^1\rangle$ | 37.52%        | 0.000         | 0.001         | 0.000         |
|          |     |         |         |         | $\langle 105 T^0, b^1, s^1\rangle$ | 0.69%         | -0.000        | -0.002        | 0.000         |
|          |     |         |         |         | $\langle 105 T^0, b^0, s^1\rangle$ | 0.00%         | 0.000         | -0.001        | 0.000         |
| 4869.6   | 0.2 | -0.004  | 0.000   | -0.000  | $\langle 109 T^1, b^1, s^1\rangle$ | 65.69%        | -0.000        | 0.000         | 0.000         |
|          |     |         |         |         | $\langle 109 T^0, b^1, s^1\rangle$ | 1.92%         | -0.003        | 0.000         | 0.000         |
|          |     |         |         |         | $\langle 109 T^0, b^0, s^1\rangle$ | 0.00%         | 0.002         | 0.000         | -0.000        |
|          |     |         |         |         | $\langle 109 T^0, b^1, s^1\rangle$ | 0.34%         | -0.001        | 0.000         | -0.000        |
| 4870.5   | 0.2 | 0.000   | 0.004   | 0.000   | $\langle 110 T^1, b^1, s^1\rangle$ | 47.77%        | 0.000         | -0.000        | -0.000        |
|          |     |         |         |         | $\langle 110 T^1, b^1, s^1\rangle$ | 20.57%        | 0.000         | 0.000         | 0.000         |

|        |      |        |        |        |                                    |        |        |        |        |
|--------|------|--------|--------|--------|------------------------------------|--------|--------|--------|--------|
|        |      |        |        |        | $\langle 110 T^0, b^1, s^1\rangle$ | 1.87%  | 0.000  | 0.003  | 0.000  |
|        |      |        |        |        | $\langle 110 T^0, b^0, s^1\rangle$ | 0.00%  | 0.000  | -0.002 | 0.000  |
|        |      |        |        |        | $\langle 110 T^0, b^1, s^1\rangle$ | 0.44%  | 0.000  | 0.001  | -0.000 |
| 4967.3 | 0.2  | 0.003  | 0.000  | -0.000 | $\langle 114 T^0, b^3, s^0\rangle$ | 94.30% | 0.003  | -0.000 | -0.000 |
|        |      |        |        |        | $\langle 114 T^0, b^1, s^1\rangle$ | 1.08%  | -0.002 | -0.000 | -0.000 |
|        |      |        |        |        | $\langle 114 T^0, b^1, s^1\rangle$ | 0.39%  | 0.001  | -0.000 | -0.000 |
| 4968.1 | 0.2  | 0.000  | -0.003 | 0.000  | $\langle 115 T^0, b^3, s^0\rangle$ | 94.19% | -0.000 | -0.003 | 0.000  |
|        |      |        |        |        | $\langle 115 T^0, b^1, s^1\rangle$ | 1.27%  | -0.000 | 0.002  | 0.000  |
|        |      |        |        |        | $\langle 115 T^0, b^1, s^1\rangle$ | 0.40%  | -0.000 | -0.001 | -0.000 |
| 5339.2 | 1.8  | -0.000 | -0.011 | 0.005  | $\langle 165 T^0, b^0, s^2\rangle$ | 53.47% | -0.000 | -0.007 | 0.003  |
|        |      |        |        |        | $\langle 165 T^1, b^3, s^0\rangle$ | 19.57% | 0.000  | 0.000  | 0.000  |
|        |      |        |        |        | $\langle 165 T^0, b^0, s^1\rangle$ | 0.00%  | 0.000  | -0.002 | 0.000  |
|        |      |        |        |        | $\langle 165 T^1, b^0, s^2\rangle$ | 3.77%  | -0.000 | 0.001  | -0.000 |
| 5340.0 | 0.6  | 0.000  | 0.006  | -0.003 | $\langle 166 T^1, b^3, s^0\rangle$ | 71.60% | 0.000  | 0.000  | 0.000  |
|        |      |        |        |        | $\langle 166 T^0, b^0, s^2\rangle$ | 14.92% | 0.000  | 0.004  | -0.002 |
|        |      |        |        |        | $\langle 166 T^0, b^0, s^1\rangle$ | 0.00%  | -0.000 | 0.001  | -0.000 |
|        |      |        |        |        | $\langle 166 T^1, b^0, s^2\rangle$ | 1.15%  | 0.000  | -0.001 | 0.000  |
| 5357.2 | 15.1 | -0.001 | 0.034  | 0.002  | $\langle 167 T^0, b^0, s^2\rangle$ | 64.63% | -0.000 | 0.026  | 0.001  |
|        |      |        |        |        | $\langle 167 T^1, b^0, s^2\rangle$ | 14.00% | 0.001  | -0.003 | 0.000  |
|        |      |        |        |        | $\langle 167 T^1, b^0, s^2\rangle$ | 11.41% | -0.000 | -0.001 | -0.000 |
|        |      |        |        |        | $\langle 167 T^0, b^0, s^1\rangle$ | 0.01%  | -0.000 | 0.006  | -0.000 |
|        |      |        |        |        | $\langle 167 T^1, b^0, s^0\rangle$ | 0.02%  | -0.001 | 0.003  | -0.000 |
| 5363.7 | 15.9 | -0.034 | -0.001 | -0.000 | $\langle 168 T^0, b^0, s^2\rangle$ | 63.80% | -0.026 | -0.000 | -0.000 |
|        |      |        |        |        | $\langle 168 T^1, b^0, s^2\rangle$ | 11.46% | 0.001  | -0.000 | 0.000  |
|        |      |        |        |        | $\langle 168 T^0, b^0, s^1\rangle$ | 0.01%  | -0.007 | -0.000 | 0.000  |
|        |      |        |        |        | $\langle 168 T^1, b^0, s^0\rangle$ | 0.02%  | -0.004 | -0.001 | 0.000  |
| 5663.0 | 0.1  | -0.003 | -0.000 | -0.000 | $\langle 191 T^1, b^0, s^2\rangle$ | 52.72% | -0.004 | -0.001 | 0.000  |
|        |      |        |        |        | $\langle 191 T^2, b^0, s^2\rangle$ | 13.33% | 0.000  | 0.000  | 0.000  |
|        |      |        |        |        | $\langle 191 T^1, b^0, s^2\rangle$ | 12.88% | 0.002  | -0.000 | 0.000  |
|        |      |        |        |        | $\langle 191 T^1, b^0, s^0\rangle$ | 0.01%  | 0.003  | 0.001  | -0.000 |
|        |      |        |        |        | $\langle 191 T^0, b^0, s^2\rangle$ | 2.02%  | -0.002 | -0.000 | 0.000  |
| 5673.7 | 0.1  | -0.000 | 0.003  | -0.000 | $\langle 192 T^1, b^0, s^2\rangle$ | 30.25% | -0.001 | -0.000 | 0.001  |
|        |      |        |        |        | $\langle 192 T^1, b^0, s^2\rangle$ | 25.39% | -0.001 | 0.004  | -0.000 |
|        |      |        |        |        | $\langle 192 T^1, b^0, s^2\rangle$ | 16.76% | -0.000 | -0.001 | -0.001 |
|        |      |        |        |        | $\langle 192 T^1, b^0, s^0\rangle$ | 0.01%  | 0.001  | -0.003 | 0.000  |
|        |      |        |        |        | $\langle 192 T^0, b^0, s^2\rangle$ | 0.24%  | -0.000 | 0.002  | 0.000  |
| 5703.2 | 0.3  | -0.000 | -0.004 | 0.001  | $\langle 196 T^1, b^0, s^2\rangle$ | 52.06% | -0.000 | -0.000 | 0.001  |
|        |      |        |        |        | $\langle 196 T^1, b^0, s^2\rangle$ | 10.21% | -0.000 | -0.000 | 0.000  |
|        |      |        |        |        | $\langle 196 T^0, b^0, s^1\rangle$ | 0.00%  | -0.000 | 0.004  | -0.000 |
|        |      |        |        |        | $\langle 196 T^0, b^0, s^2\rangle$ | 1.02%  | 0.000  | -0.003 | -0.000 |
|        |      |        |        |        | $\langle 196 T^0, b^0, s^2\rangle$ | 6.58%  | -0.000 | -0.003 | 0.001  |
| 5716.8 | 1.3  | 0.000  | -0.010 | -0.000 | $\langle 197 T^1, b^0, s^2\rangle$ | 24.78% | 0.000  | -0.001 | -0.000 |
|        |      |        |        |        | $\langle 197 T^0, b^0, s^2\rangle$ | 15.64% | 0.000  | -0.013 | -0.000 |
|        |      |        |        |        | $\langle 197 T^1, b^0, s^2\rangle$ | 14.28% | 0.001  | -0.003 | 0.000  |
|        |      |        |        |        | $\langle 197 T^0, b^0, s^1\rangle$ | 0.02%  | -0.000 | 0.009  | -0.000 |

|        |     |        |        |        |                                    |        |        |        |        |
|--------|-----|--------|--------|--------|------------------------------------|--------|--------|--------|--------|
| 5723.5 | 1.4 | 0.010  | 0.000  | 0.000  | $\langle 198 T^1, b^0, s^2\rangle$ | 26.03% | 0.001  | 0.000  | 0.000  |
|        |     |        |        |        | $\langle 198 T^0, b^0, s^2\rangle$ | 18.43% | 0.014  | 0.000  | 0.000  |
|        |     |        |        |        | $\langle 198 T^1, b^0, s^2\rangle$ | 11.35% | 0.001  | -0.000 | 0.000  |
|        |     |        |        |        | $\langle 198 T^0, b^0, s^1\rangle$ | 0.02%  | -0.009 | -0.000 | 0.000  |
|        |     |        |        |        | $\langle 198 T^0, b^0, s^2\rangle$ | 2.85%  | -0.002 | -0.000 | 0.000  |
| 5743.8 | 0.4 | 0.000  | -0.005 | -0.000 | $\langle 200 T^1, b^0, s^2\rangle$ | 41.46% | -0.000 | 0.001  | 0.000  |
|        |     |        |        |        | $\langle 200 T^0, b^0, s^2\rangle$ | 13.66% | 0.000  | -0.012 | -0.000 |
|        |     |        |        |        | $\langle 200 T^1, b^0, s^2\rangle$ | 10.76% | -0.000 | -0.001 | -0.000 |
|        |     |        |        |        | $\langle 200 T^0, b^0, s^1\rangle$ | 0.01%  | -0.000 | 0.006  | -0.000 |
|        |     |        |        |        | $\langle 200 T^1, b^0, s^2\rangle$ | 4.39%  | 0.000  | -0.002 | 0.000  |
| 5749.8 | 0.3 | 0.005  | 0.000  | 0.000  | $\langle 201 T^1, b^0, s^2\rangle$ | 50.61% | -0.002 | -0.000 | -0.000 |
|        |     |        |        |        | $\langle 201 T^0, b^0, s^2\rangle$ | 11.57% | 0.011  | 0.000  | 0.000  |
|        |     |        |        |        | $\langle 201 T^0, b^0, s^1\rangle$ | 0.01%  | -0.007 | -0.000 | 0.000  |
|        |     |        |        |        | $\langle 201 T^0, b^0, s^2\rangle$ | 3.59%  | -0.002 | -0.000 | 0.000  |
| 5811.4 | 1.1 | -0.009 | -0.000 | 0.000  | $\langle 202 T^0, b^0, s^2\rangle$ | 81.35% | -0.010 | -0.000 | 0.000  |
|        |     |        |        |        | $\langle 202 T^0, b^0, s^1\rangle$ | 0.02%  | 0.008  | 0.000  | -0.000 |
|        |     |        |        |        | $\langle 202 T^0, b^0, s^2\rangle$ | 2.00%  | -0.005 | -0.000 | -0.000 |
| 5828.6 | 0.8 | 0.000  | -0.007 | 0.000  | $\langle 203 T^0, b^0, s^2\rangle$ | 85.32% | 0.000  | -0.010 | 0.000  |
|        |     |        |        |        | $\langle 203 T^0, b^0, s^1\rangle$ | 0.01%  | -0.000 | 0.007  | -0.000 |
|        |     |        |        |        | $\langle 203 T^0, b^0, s^2\rangle$ | 0.86%  | 0.000  | -0.003 | -0.000 |
| 5915.9 | 0.2 | -0.000 | -0.001 | -0.003 | $\langle 204 T^0, b^0, s^2\rangle$ | 75.29% | -0.000 | -0.001 | -0.005 |
|        |     |        |        |        | $\langle 204 T^0, b^0, s^1\rangle$ | 0.02%  | 0.000  | 0.001  | 0.002  |
|        |     |        |        |        | $\langle 204 T^0, b^0, s^2\rangle$ | 0.05%  | 0.000  | -0.001 | -0.000 |
| 6028.9 | 0.3 | -0.000 | 0.004  | -0.000 | $\langle 205 T^0, b^2, s^1\rangle$ | 51.87% | 0.000  | -0.013 | 0.000  |
|        |     |        |        |        | $\langle 205 T^0, b^2, s^1\rangle$ | 16.73% | -0.000 | -0.001 | 0.000  |
|        |     |        |        |        | $\langle 205 T^0, b^2, s^1\rangle$ | 13.61% | -0.000 | -0.000 | -0.000 |
|        |     |        |        |        | $\langle 205 T^0, b^0, s^1\rangle$ | 0.08%  | -0.000 | 0.018  | -0.000 |
|        |     |        |        |        | $\langle 205 T^0, b^0, s^2\rangle$ | 0.11%  | -0.000 | 0.001  | 0.000  |
| 6034.0 | 0.3 | -0.004 | -0.000 | 0.000  | $\langle 206 T^0, b^2, s^1\rangle$ | 47.94% | 0.012  | 0.000  | 0.000  |
|        |     |        |        |        | $\langle 206 T^0, b^2, s^1\rangle$ | 24.58% | 0.001  | -0.000 | 0.000  |
|        |     |        |        |        | $\langle 206 T^0, b^0, s^1\rangle$ | 0.08%  | -0.017 | -0.000 | 0.000  |
|        |     |        |        |        | $\langle 206 T^0, b^0, s^2\rangle$ | 0.12%  | -0.001 | -0.000 | -0.000 |
| 6890.9 | 0.1 | -0.002 | -0.000 | -0.000 | $\langle 336 T^0, b^1, s^2\rangle$ | 39.18% | -0.000 | 0.000  | 0.000  |
|        |     |        |        |        | $\langle 336 T^0, b^1, s^2\rangle$ | 17.44% | -0.000 | 0.000  | -0.000 |
|        |     |        |        |        | $\langle 336 T^1, b^1, s^2\rangle$ | 4.05%  | -0.001 | -0.000 | -0.000 |
|        |     |        |        |        | $\langle 336 T^0, b^1, s^0\rangle$ | 0.04%  | -0.001 | -0.000 | 0.000  |
|        |     |        |        |        | $\langle 336 T^0, b^0, s^2\rangle$ | 0.02%  | -0.000 | -0.000 | -0.000 |
| 6892.2 | 0.1 | 0.000  | -0.002 | -0.000 | $\langle 337 T^0, b^1, s^2\rangle$ | 21.36% | 0.000  | 0.000  | 0.000  |
|        |     |        |        |        | $\langle 337 T^0, b^1, s^2\rangle$ | 19.31% | -0.000 | -0.000 | -0.000 |
|        |     |        |        |        | $\langle 337 T^0, b^1, s^2\rangle$ | 16.12% | -0.000 | -0.000 | 0.000  |
|        |     |        |        |        | $\langle 337 T^1, b^1, s^2\rangle$ | 11.12% | 0.000  | 0.000  | 0.000  |
|        |     |        |        |        | $\langle 337 T^0, b^0, s^1\rangle$ | 0.00%  | 0.000  | -0.001 | 0.000  |
|        |     |        |        |        | $\langle 337 T^0, b^1, s^0\rangle$ | 0.04%  | 0.000  | -0.001 | 0.000  |
| 6987.1 | 0.1 | 0.000  | 0.003  | -0.000 | $\langle 361 T^0, b^1, s^2\rangle$ | 37.20% | 0.000  | 0.000  | 0.000  |

|                                    |        |        |        |        |
|------------------------------------|--------|--------|--------|--------|
| $\langle 361 T^0, b^1, s^2\rangle$ | 24.45% | 0.000  | 0.001  | 0.000  |
| $\langle 361 T^1, b^1, s^2\rangle$ | 14.60% | -0.000 | -0.001 | 0.000  |
| $\langle 361 T^0, b^0, s^1\rangle$ | 0.01%  | -0.000 | 0.005  | -0.000 |
| $\langle 361 T^0, b^0, s^2\rangle$ | 0.27%  | 0.000  | -0.002 | -0.000 |
| $\langle 361 T^1, b^1, s^2\rangle$ | 7.02%  | 0.000  | -0.001 | 0.000  |

---
